# Supplementary material for: Arbuscular Mycorrhizal Symbiosis Leads to Differential Regulation of Drought-Responsive Genes in Tissue-Specific Root Cells of Common Bean
Source: Front Microbiol. 2018 Jun 21;9:1339. doi: 10.3389/fmicb.2018.01339 (PMC6036286; doi:10.3389/fmicb.2018.01339)
Supplement: TABLE S5 — Enrichment analysis of ontology terms. Test set: list of DEGs retrieved after the statistical comparisons: Myc+/Ctrl × Myc+/Strss (AMF-inoculated, control vs. water deficit); Myc-/Ctrl × Myc-/Strss (non-inoculated, control vs. water deficit); Myc-/Ctrl vs. Myc+/Ctrl (control, AMF-inoculated vs. non-inoculated) (separated in different spreadsheets). Reference set: total set of Phaseolus vulgaris transcripts. Enriched ontology terms are defined according to Gene Ontology ids. C, cellular component; F, molecular function; P, biological process. Data are organized according to p-value adjusted with a FDR <0.01. [file Table_5.XLSX]

## Sheet: Myc+Ctrl vs. Myc+Strss
GO-ID	Term	Category	FDR	P-Value	#Test	#Ref	#notAnnotTest	#notAnnotRef	Over/Under	TestSeqs	RefSeqs
GO:0043229	intracellular organelle	C	2.11633e-12	2.11633e-14	1644	4421	4774	9407	UNDER	Phvul.008G229700, Phvul.003G208600, Phvul.001G262800, Phvul.002G256400, Phvul.004G092600, Phvul.003G222900, Phvul.002G165500, Phvul.004G031200, Phvul.003G058400, Phvul.001G021800, Phvul.008G285400, Phvul.003G195200, Phvul.008G249300, Phvul.007G262000, Phvul.003G084700, Phvul.009G020700, Phvul.010G116500, Phvul.010G070200, Phvul.005G142000, Phvul.007G188800, Phvul.003G062900, Phvul.003G232700, Phv…	Phvul.011G000600, Phvul.003G107900, Phvul.011G025900, Phvul.005G086200, Phvul.011G071800, CUFF.1825.1, Phvul.001G258300, Phvul.009G032700, Phvul.006G052700, Phvul.005G109400, Phvul.005G054600, Phvul.006G013100, CUFF.238.2, Phvul.010G034100, Phvul.002G0350
GO:0043226	organelle	C	2.11633e-12	2.11633e-14	1644	4421	4774	9407	UNDER	Phvul.008G229700, Phvul.003G208600, Phvul.001G262800, Phvul.002G256400, Phvul.004G092600, Phvul.003G222900, Phvul.002G165500, Phvul.004G031200, Phvul.003G058400, Phvul.001G021800, Phvul.008G285400, Phvul.003G195200, Phvul.008G249300, Phvul.007G262000, Phvul.003G084700, Phvul.009G020700, Phvul.010G116500, Phvul.010G070200, Phvul.005G142000, Phvul.007G188800, Phvul.003G062900, Phvul.003G232700, Phv…	Phvul.011G000600, Phvul.003G107900, Phvul.011G025900, Phvul.005G086200, Phvul.011G071800, CUFF.1825.1, Phvul.001G258300, Phvul.009G032700, Phvul.006G052700, Phvul.005G109400, Phvul.005G054600, Phvul.006G013100, CUFF.238.2, Phvul.010G034100, Phvul.002G0350
GO:0006807	nitrogen compound metabolic process	P	5.27878e-12	1.05576e-13	955	2784	5463	11044	UNDER	Phvul.003G289600, Phvul.008G229700, Phvul.006G208200, Phvul.003G208600, Phvul.002G256400, Phvul.004G122100, Phvul.005G050000, Phvul.003G222900, Phvul.002G165500, Phvul.011G011500, Phvul.003G195200, Phvul.008G249300, Phvul.007G262000, Phvul.009G178300, Phvul.005G045900, Phvul.002G232200, Phvul.009G226700, Phvul.010G070200, Phvul.005G142000, Phvul.007G188800, Phvul.003G012400, Phvul.002G036100, Phv…	Phvul.007G176800, Phvul.003G094500, Phvul.007G092200, Phvul.005G086200, CUFF.5835.1, Phvul.009G032700, Phvul.008G090300, Phvul.007G036500, Phvul.009G168500, CUFF.3776.1, Phvul.010G034100, Phvul.006G143600, Phvul.011G126600, Phvul.009G006400, Phvul.003G159
GO:0034641	cellular nitrogen compound metabolic process	P	5.27878e-12	1.05576e-13	955	2784	5463	11044	UNDER	Phvul.003G289600, Phvul.008G229700, Phvul.006G208200, Phvul.003G208600, Phvul.002G256400, Phvul.004G122100, Phvul.005G050000, Phvul.003G222900, Phvul.002G165500, Phvul.011G011500, Phvul.003G195200, Phvul.008G249300, Phvul.007G262000, Phvul.009G178300, Phvul.005G045900, Phvul.002G232200, Phvul.009G226700, Phvul.010G070200, Phvul.005G142000, Phvul.007G188800, Phvul.003G012400, Phvul.002G036100, Phv…	Phvul.007G176800, Phvul.003G094500, Phvul.007G092200, Phvul.005G086200, CUFF.5835.1, Phvul.009G032700, Phvul.008G090300, Phvul.007G036500, Phvul.009G168500, CUFF.3776.1, Phvul.010G034100, Phvul.006G143600, Phvul.011G126600, Phvul.009G006400, Phvul.003G159
GO:0044424	intracellular part	C	1.16941e-11	2.92352e-13	2029	5268	4389	8560	UNDER	Phvul.003G289600, Phvul.008G229700, Phvul.003G153800, Phvul.003G208600, Phvul.001G262800, Phvul.002G256400, Phvul.004G092600, Phvul.003G222900, Phvul.002G165500, Phvul.004G031200, Phvul.003G058400, Phvul.001G021800, Phvul.006G084300, Phvul.008G285400, Phv	Phvul.011G000600, Phvul.003G107900, Phvul.011G025900, Phvul.005G086200, Phvul.011G071800, CUFF.1825.1, Phvul.001G258300, Phvul.009G032700, Phvul.006G052700, Phvul.005G109400, Phvul.005G054600, Phvul.006G013100, CUFF.238.2, Phvul.010G034100, CUFF.5278.1, P
GO:0005622	intracellular	C	9.4228e-11	2.82684e-13	2334	5922	4084	7906	UNDER	Phvul.003G289600, Phvul.008G229700, Phvul.003G153800, Phvul.003G208600, Phvul.001G262800, Phvul.002G256400, Phvul.004G092600, Phvul.003G222900, Phvul.002G165500, Phvul.004G031200, Phvul.009G107100, Phvul.003G058400, Phvul.002G145900, Phvul.001G021800, Phv	Phvul.011G000600, Phvul.003G107900, Phvul.011G025900, Phvul.005G086200, Phvul.011G071800, Phvul.010G128500, CUFF.1825.1, Phvul.001G258300, Phvul.006G107500, Phvul.009G032700, Phvul.006G052700, Phvul.005G109400, Phvul.006G038400, Phvul.005G054600, Phvul.00
GO:0043231	intracellular membrane-bounded organelle	C	1.49386e-08	5.97543e-11	1494	3963	4924	9865	UNDER	Phvul.011G216400, Phvul.011G186900, Phvul.003G208600, Phvul.001G262800, Phvul.002G256400, Phvul.008G055300, Phvul.004G168100, Phvul.005G050000, Phvul.004G092600, Phvul.003G222900, Phvul.003G073800, Phvul.002G165500, Phvul.004G031200, Phvul.003G058400, Phvul.001G021800, Phvul.009G183900, Phvul.011G011500, Phvul.008G285400, Phvul.008G029000, Phvul.003G195200, Phvul.008G249300, Phvul.007G262000, Phv…	Phvul.011G000600, Phvul.003G107900, Phvul.011G025900, Phvul.005G086200, Phvul.011G071800, CUFF.1825.1, Phvul.001G258300, Phvul.009G032700, Phvul.005G109400, Phvul.005G054600, Phvul.006G013100, CUFF.238.2, Phvul.010G034100, Phvul.002G035000, Phvul.001G0632
GO:0043227	membrane-bounded organelle	C	1.49386e-08	5.97543e-11	1494	3963	4924	9865	UNDER	Phvul.011G216400, Phvul.011G186900, Phvul.003G208600, Phvul.001G262800, Phvul.002G256400, Phvul.008G055300, Phvul.004G168100, Phvul.005G050000, Phvul.004G092600, Phvul.003G222900, Phvul.003G073800, Phvul.002G165500, Phvul.004G031200, Phvul.003G058400, Phvul.001G021800, Phvul.009G183900, Phvul.011G011500, Phvul.008G285400, Phvul.008G029000, Phvul.003G195200, Phvul.008G249300, Phvul.007G262000, Phv…	Phvul.011G000600, Phvul.003G107900, Phvul.011G025900, Phvul.005G086200, Phvul.011G071800, CUFF.1825.1, Phvul.001G258300, Phvul.009G032700, Phvul.005G109400, Phvul.005G054600, Phvul.006G013100, CUFF.238.2, Phvul.010G034100, Phvul.002G035000, Phvul.001G0632
GO:0044271	cellular nitrogen compound biosynthetic process	P	6.01377e-08	6.01377e-09	107	495	6311	13333	UNDER	Phvul.002G289600, Phvul.009G036100, Phvul.003G285400, Phvul.008G229700, Phvul.008G256400, Phvul.011G109300, Phvul.008G036900, Phvul.002G256400, Phvul.009G116900, Phvul.002G256000, Phvul.009G239100, Phvul.011G011500, Phvul.001G201000, Phvul.009G094100, Phvul.004G174900, Phvul.008G249300, Phvul.008G174500, Phvul.007G029400, Phvul.011G086500, Phvul.008G234500, Phvul.005G020700, Phvul.010G164300, Phv…	Phvul.003G025600, CUFF.3173.1, Phvul.003G094500, Phvul.004G065100, Phvul.007G092200, Phvul.003G105600, Phvul.009G032700, CUFF.3730.1, Phvul.011G079400, Phvul.002G050400, CUFF.4662.1, Phvul.011G126600, Phvul.003G159100, Phvul.002G266200, Phvul.004G046700, Phvul.006G063600, Phvul.002G322100, CUFF.2867.1, Phvul.007G278700, Phvul.003G219500, CUFF.1332.1, CUFF.992.2, Phvul.003G276400, Phvul.011G009300…
GO:0043603	cellular amide metabolic process	P	6.01377e-08	6.01377e-09	107	495	6311	13333	UNDER	Phvul.002G289600, Phvul.009G036100, Phvul.003G285400, Phvul.008G229700, Phvul.008G256400, Phvul.011G109300, Phvul.008G036900, Phvul.002G256400, Phvul.009G116900, Phvul.002G256000, Phvul.009G239100, Phvul.011G011500, Phvul.001G201000, Phvul.009G094100, Phvul.004G174900, Phvul.008G249300, Phvul.008G174500, Phvul.007G029400, Phvul.011G086500, Phvul.008G234500, Phvul.005G020700, Phvul.010G164300, Phv…	Phvul.003G025600, CUFF.3173.1, Phvul.003G094500, Phvul.004G065100, Phvul.007G092200, Phvul.003G105600, Phvul.009G032700, CUFF.3730.1, Phvul.011G079400, Phvul.002G050400, CUFF.4662.1, Phvul.011G126600, Phvul.003G159100, Phvul.002G266200, Phvul.004G046700, Phvul.006G063600, Phvul.002G322100, CUFF.2867.1, Phvul.007G278700, Phvul.003G219500, CUFF.1332.1, CUFF.992.2, Phvul.003G276400, Phvul.011G009300…
GO:0044249	cellular biosynthetic process	P	6.01377e-08	6.01377e-09	107	495	6311	13333	UNDER	Phvul.002G289600, Phvul.009G036100, Phvul.003G285400, Phvul.008G229700, Phvul.008G256400, Phvul.011G109300, Phvul.008G036900, Phvul.002G256400, Phvul.009G116900, Phvul.002G256000, Phvul.009G239100, Phvul.011G011500, Phvul.001G201000, Phvul.009G094100, Phvul.004G174900, Phvul.008G249300, Phvul.008G174500, Phvul.007G029400, Phvul.011G086500, Phvul.008G234500, Phvul.005G020700, Phvul.010G164300, Phv…	Phvul.003G025600, CUFF.3173.1, Phvul.003G094500, Phvul.004G065100, Phvul.007G092200, Phvul.003G105600, Phvul.009G032700, CUFF.3730.1, Phvul.011G079400, Phvul.002G050400, CUFF.4662.1, Phvul.011G126600, Phvul.003G159100, Phvul.002G266200, Phvul.004G046700, Phvul.006G063600, Phvul.002G322100, CUFF.2867.1, Phvul.007G278700, Phvul.003G219500, CUFF.1332.1, CUFF.992.2, Phvul.003G276400, Phvul.011G009300…
GO:1901576	organic substance biosynthetic process	P	6.01377e-08	6.01377e-09	107	495	6311	13333	UNDER	Phvul.002G289600, Phvul.009G036100, Phvul.003G285400, Phvul.008G229700, Phvul.008G256400, Phvul.011G109300, Phvul.008G036900, Phvul.002G256400, Phvul.009G116900, Phvul.002G256000, Phvul.009G239100, Phvul.011G011500, Phvul.001G201000, Phvul.009G094100, Phvul.004G174900, Phvul.008G249300, Phvul.008G174500, Phvul.007G029400, Phvul.011G086500, Phvul.008G234500, Phvul.005G020700, Phvul.010G164300, Phv…	Phvul.003G025600, CUFF.3173.1, Phvul.003G094500, Phvul.004G065100, Phvul.007G092200, Phvul.003G105600, Phvul.009G032700, CUFF.3730.1, Phvul.011G079400, Phvul.002G050400, CUFF.4662.1, Phvul.011G126600, Phvul.003G159100, Phvul.002G266200, Phvul.004G046700, Phvul.006G063600, Phvul.002G322100, CUFF.2867.1, Phvul.007G278700, Phvul.003G219500, CUFF.1332.1, CUFF.992.2, Phvul.003G276400, Phvul.011G009300…
GO:0006518	peptide metabolic process	P	6.01377e-08	6.01377e-09	107	495	6311	13333	UNDER	Phvul.002G289600, Phvul.009G036100, Phvul.003G285400, Phvul.008G229700, Phvul.008G256400, Phvul.011G109300, Phvul.008G036900, Phvul.002G256400, Phvul.009G116900, Phvul.002G256000, Phvul.009G239100, Phvul.011G011500, Phvul.001G201000, Phvul.009G094100, Phvul.004G174900, Phvul.008G249300, Phvul.008G174500, Phvul.007G029400, Phvul.011G086500, Phvul.008G234500, Phvul.005G020700, Phvul.010G164300, Phv…	Phvul.003G025600, CUFF.3173.1, Phvul.003G094500, Phvul.004G065100, Phvul.007G092200, Phvul.003G105600, Phvul.009G032700, CUFF.3730.1, Phvul.011G079400, Phvul.002G050400, CUFF.4662.1, Phvul.011G126600, Phvul.003G159100, Phvul.002G266200, Phvul.004G046700, Phvul.006G063600, Phvul.002G322100, CUFF.2867.1, Phvul.007G278700, Phvul.003G219500, CUFF.1332.1, CUFF.992.2, Phvul.003G276400, Phvul.011G009300…
GO:1901566	organonitrogen compound biosynthetic process	P	6.01377e-08	6.01377e-09	107	495	6311	13333	UNDER	Phvul.002G289600, Phvul.009G036100, Phvul.003G285400, Phvul.008G229700, Phvul.008G256400, Phvul.011G109300, Phvul.008G036900, Phvul.002G256400, Phvul.009G116900, Phvul.002G256000, Phvul.009G239100, Phvul.011G011500, Phvul.001G201000, Phvul.009G094100, Phvul.004G174900, Phvul.008G249300, Phvul.008G174500, Phvul.007G029400, Phvul.011G086500, Phvul.008G234500, Phvul.005G020700, Phvul.010G164300, Phv…	Phvul.003G025600, CUFF.3173.1, Phvul.003G094500, Phvul.004G065100, Phvul.007G092200, Phvul.003G105600, Phvul.009G032700, CUFF.3730.1, Phvul.011G079400, Phvul.002G050400, CUFF.4662.1, Phvul.011G126600, Phvul.003G159100, Phvul.002G266200, Phvul.004G046700, Phvul.006G063600, Phvul.002G322100, CUFF.2867.1, Phvul.007G278700, Phvul.003G219500, CUFF.1332.1, CUFF.992.2, Phvul.003G276400, Phvul.011G009300…
GO:0043043	peptide biosynthetic process	P	6.01377e-08	6.01377e-09	107	495	6311	13333	UNDER	Phvul.002G289600, Phvul.009G036100, Phvul.003G285400, Phvul.008G229700, Phvul.008G256400, Phvul.011G109300, Phvul.008G036900, Phvul.002G256400, Phvul.009G116900, Phvul.002G256000, Phvul.009G239100, Phvul.011G011500, Phvul.001G201000, Phvul.009G094100, Phvul.004G174900, Phvul.008G249300, Phvul.008G174500, Phvul.007G029400, Phvul.011G086500, Phvul.008G234500, Phvul.005G020700, Phvul.010G164300, Phv…	Phvul.003G025600, CUFF.3173.1, Phvul.003G094500, Phvul.004G065100, Phvul.007G092200, Phvul.003G105600, Phvul.009G032700, CUFF.3730.1, Phvul.011G079400, Phvul.002G050400, CUFF.4662.1, Phvul.011G126600, Phvul.003G159100, Phvul.002G266200, Phvul.004G046700, Phvul.006G063600, Phvul.002G322100, CUFF.2867.1, Phvul.007G278700, Phvul.003G219500, CUFF.1332.1, CUFF.992.2, Phvul.003G276400, Phvul.011G009300…
GO:0034645	cellular macromolecule biosynthetic process	P	6.01377e-08	6.01377e-09	107	495	6311	13333	UNDER	Phvul.002G289600, Phvul.009G036100, Phvul.003G285400, Phvul.008G229700, Phvul.008G256400, Phvul.011G109300, Phvul.008G036900, Phvul.002G256400, Phvul.009G116900, Phvul.002G256000, Phvul.009G239100, Phvul.011G011500, Phvul.001G201000, Phvul.009G094100, Phvul.004G174900, Phvul.008G249300, Phvul.008G174500, Phvul.007G029400, Phvul.011G086500, Phvul.008G234500, Phvul.005G020700, Phvul.010G164300, Phv…	Phvul.003G025600, CUFF.3173.1, Phvul.003G094500, Phvul.004G065100, Phvul.007G092200, Phvul.003G105600, Phvul.009G032700, CUFF.3730.1, Phvul.011G079400, Phvul.002G050400, CUFF.4662.1, Phvul.011G126600, Phvul.003G159100, Phvul.002G266200, Phvul.004G046700, Phvul.006G063600, Phvul.002G322100, CUFF.2867.1, Phvul.007G278700, Phvul.003G219500, CUFF.1332.1, CUFF.992.2, Phvul.003G276400, Phvul.011G009300…
GO:0009059	macromolecule biosynthetic process	P	6.01377e-08	6.01377e-09	107	495	6311	13333	UNDER	Phvul.002G289600, Phvul.009G036100, Phvul.003G285400, Phvul.008G229700, Phvul.008G256400, Phvul.011G109300, Phvul.008G036900, Phvul.002G256400, Phvul.009G116900, Phvul.002G256000, Phvul.009G239100, Phvul.011G011500, Phvul.001G201000, Phvul.009G094100, Phvul.004G174900, Phvul.008G249300, Phvul.008G174500, Phvul.007G029400, Phvul.011G086500, Phvul.008G234500, Phvul.005G020700, Phvul.010G164300, Phv…	Phvul.003G025600, CUFF.3173.1, Phvul.003G094500, Phvul.004G065100, Phvul.007G092200, Phvul.003G105600, Phvul.009G032700, CUFF.3730.1, Phvul.011G079400, Phvul.002G050400, CUFF.4662.1, Phvul.011G126600, Phvul.003G159100, Phvul.002G266200, Phvul.004G046700, Phvul.006G063600, Phvul.002G322100, CUFF.2867.1, Phvul.007G278700, Phvul.003G219500, CUFF.1332.1, CUFF.992.2, Phvul.003G276400, Phvul.011G009300…
GO:0043604	amide biosynthetic process	P	6.01377e-08	6.01377e-09	107	495	6311	13333	UNDER	Phvul.002G289600, Phvul.009G036100, Phvul.003G285400, Phvul.008G229700, Phvul.008G256400, Phvul.011G109300, Phvul.008G036900, Phvul.002G256400, Phvul.009G116900, Phvul.002G256000, Phvul.009G239100, Phvul.011G011500, Phvul.001G201000, Phvul.009G094100, Phvul.004G174900, Phvul.008G249300, Phvul.008G174500, Phvul.007G029400, Phvul.011G086500, Phvul.008G234500, Phvul.005G020700, Phvul.010G164300, Phv…	Phvul.003G025600, CUFF.3173.1, Phvul.003G094500, Phvul.004G065100, Phvul.007G092200, Phvul.003G105600, Phvul.009G032700, CUFF.3730.1, Phvul.011G079400, Phvul.002G050400, CUFF.4662.1, Phvul.011G126600, Phvul.003G159100, Phvul.002G266200, Phvul.004G046700, Phvul.006G063600, Phvul.002G322100, CUFF.2867.1, Phvul.007G278700, Phvul.003G219500, CUFF.1332.1, CUFF.992.2, Phvul.003G276400, Phvul.011G009300…
GO:1901564	organonitrogen compound metabolic process	P	6.01377e-08	6.01377e-09	107	495	6311	13333	UNDER	Phvul.002G289600, Phvul.009G036100, Phvul.003G285400, Phvul.008G229700, Phvul.008G256400, Phvul.011G109300, Phvul.008G036900, Phvul.002G256400, Phvul.009G116900, Phvul.002G256000, Phvul.009G239100, Phvul.011G011500, Phvul.001G201000, Phvul.009G094100, Phvul.004G174900, Phvul.008G249300, Phvul.008G174500, Phvul.007G029400, Phvul.011G086500, Phvul.008G234500, Phvul.005G020700, Phvul.010G164300, Phv…	Phvul.003G025600, CUFF.3173.1, Phvul.003G094500, Phvul.004G065100, Phvul.007G092200, Phvul.003G105600, Phvul.009G032700, CUFF.3730.1, Phvul.011G079400, Phvul.002G050400, CUFF.4662.1, Phvul.011G126600, Phvul.003G159100, Phvul.002G266200, Phvul.004G046700, Phvul.006G063600, Phvul.002G322100, CUFF.2867.1, Phvul.007G278700, Phvul.003G219500, CUFF.1332.1, CUFF.992.2, Phvul.003G276400, Phvul.011G009300…
GO:0006412	translation	P	6.01377e-08	6.01377e-09	107	495	6311	13333	UNDER	Phvul.002G289600, Phvul.009G036100, Phvul.003G285400, Phvul.008G229700, Phvul.008G256400, Phvul.011G109300, Phvul.008G036900, Phvul.002G256400, Phvul.009G116900, Phvul.002G256000, Phvul.009G239100, Phvul.011G011500, Phvul.001G201000, Phvul.009G094100, Phvul.004G174900, Phvul.008G249300, Phvul.008G174500, Phvul.007G029400, Phvul.011G086500, Phvul.008G234500, Phvul.005G020700, Phvul.010G164300, Phv…	Phvul.003G025600, CUFF.3173.1, Phvul.003G094500, Phvul.004G065100, Phvul.007G092200, Phvul.003G105600, Phvul.009G032700, CUFF.3730.1, Phvul.011G079400, Phvul.002G050400, CUFF.4662.1, Phvul.011G126600, Phvul.003G159100, Phvul.002G266200, Phvul.004G046700, Phvul.006G063600, Phvul.002G322100, CUFF.2867.1, Phvul.007G278700, Phvul.003G219500, CUFF.1332.1, CUFF.992.2, Phvul.003G276400, Phvul.011G009300…
GO:0006259	DNA metabolic process	P	6.98568e-08	7.68425e-09	105	487	6313	13341	UNDER	Phvul.005G101400, Phvul.003G254100, Phvul.004G122100, Phvul.003G015400, Phvul.011G019100, Phvul.002G209800, Phvul.003G195200, Phvul.010G008200, Phvul.007G125600, Phvul.005G045900, Phvul.002G001900, Phvul.010G131400, Phvul.008G196000, Phvul.003G064000, Phvul.007G181700, Phvul.003G030500, Phvul.001G093300, Phvul.002G070300, Phvul.001G070800, Phvul.001G232700, Phvul.007G062500, Phvul.009G118000, Phv…	Phvul.001G096000, Phvul.007G176800, CUFF.5835.1, Phvul.010G161200, Phvul.007G101000, Phvul.010G034100, Phvul.001G178300, Phvul.010G080000, Phvul.009G040200, Phvul.001G099400, CUFF.5388.1, CUFF.6745.1, Phvul.005G148900, Phvul.008G242800, Phvul.009G052300, Phvul.004G070700, Phvul.005G016200, Phvul.001G121400, Phvul.009G076500, Phvul.008G238300, CUFF.4478.1, CUFF.292.1, CUFF.2833.1, Phvul.003G000400…
GO:0090304	nucleic acid metabolic process	P	6.98568e-08	7.68425e-09	105	487	6313	13341	UNDER	Phvul.005G101400, Phvul.003G254100, Phvul.004G122100, Phvul.003G015400, Phvul.011G019100, Phvul.002G209800, Phvul.003G195200, Phvul.010G008200, Phvul.007G125600, Phvul.005G045900, Phvul.002G001900, Phvul.010G131400, Phvul.008G196000, Phvul.003G064000, Phvul.007G181700, Phvul.003G030500, Phvul.001G093300, Phvul.002G070300, Phvul.001G070800, Phvul.001G232700, Phvul.007G062500, Phvul.009G118000, Phv…	Phvul.001G096000, Phvul.007G176800, CUFF.5835.1, Phvul.010G161200, Phvul.007G101000, Phvul.010G034100, Phvul.001G178300, Phvul.010G080000, Phvul.009G040200, Phvul.001G099400, CUFF.5388.1, CUFF.6745.1, Phvul.005G148900, Phvul.008G242800, Phvul.009G052300, Phvul.004G070700, Phvul.005G016200, Phvul.001G121400, Phvul.009G076500, Phvul.008G238300, CUFF.4478.1, CUFF.292.1, CUFF.2833.1, Phvul.003G000400…
GO:0003824	catalytic activity	F	2.16597e-07	2.49086e-08	3323	6363	3095	7465	OVER	Phvul.006G208200, Phvul.007G050800, Phvul.003G033100, Phvul.004G011600, Phvul.003G058400, Phvul.005G130000, Phvul.008G249300, Phvul.001G112700, Phvul.011G020200, Phvul.005G074200, Phvul.004G169200, Phvul.003G127500, Phvul.007G188800, Phvul.006G185000, Phv	Phvul.007G151500, Phvul.005G015000, Phvul.011G025900, Phvul.006G107500, Phvul.009G032700, CUFF.1366.1, CUFF.3523.1, Phvul.007G036500, Phvul.005G054600, Phvul.010G034100, Phvul.009G006400, Phvul.009G121400, Phvul.006G018800, Phvul.009G222100, Phvul.010G148
GO:0043228	non-membrane-bounded organelle	C	3.67216e-07	4.5902e-08	224	821	6194	13007	UNDER	Phvul.001G130000, Phvul.008G229700, Phvul.008G256400, Phvul.008G036900, Phvul.002G256400, Phvul.004G168100, Phvul.007G124000, Phvul.009G017300, Phvul.007G159100, Phvul.003G145500, Phvul.006G160500, Phvul.011G011500, Phvul.007G273700, Phvul.009G004100, Phvul.002G111200, Phvul.011G044300, Phvul.011G086500, Phvul.008G169200, Phvul.005G020700, Phvul.004G162100, Phvul.003G204100, Phvul.001G111700, Phv…	Phvul.003G094500, Phvul.007G092200, Phvul.006G132700, Phvul.006G052700, Phvul.002G050400, Phvul.005G090700, Phvul.005G054600, Phvul.011G206600, Phvul.011G172500, Phvul.006G143600, Phvul.011G126600, Phvul.003G159100, Phvul.002G155700, Phvul.002G266200, Phvul.004G046700, Phvul.006G063600, Phvul.007G207400, CUFF.2867.1, Phvul.003G154900, CUFF.6831.1, Phvul.001G200300, CUFF.992.2, Phvul.011G033300, C…
GO:0043232	intracellular non-membrane-bounded organelle	C	3.67216e-07	4.5902e-08	224	821	6194	13007	UNDER	Phvul.001G130000, Phvul.008G229700, Phvul.008G256400, Phvul.008G036900, Phvul.002G256400, Phvul.004G168100, Phvul.007G124000, Phvul.009G017300, Phvul.007G159100, Phvul.003G145500, Phvul.006G160500, Phvul.011G011500, Phvul.007G273700, Phvul.009G004100, Phvul.002G111200, Phvul.011G044300, Phvul.011G086500, Phvul.008G169200, Phvul.005G020700, Phvul.004G162100, Phvul.003G204100, Phvul.001G111700, Phv…	Phvul.003G094500, Phvul.007G092200, Phvul.006G132700, Phvul.006G052700, Phvul.002G050400, Phvul.005G090700, Phvul.005G054600, Phvul.011G206600, Phvul.011G172500, Phvul.006G143600, Phvul.011G126600, Phvul.003G159100, Phvul.002G155700, Phvul.002G266200, Phvul.004G046700, Phvul.006G063600, Phvul.007G207400, CUFF.2867.1, Phvul.003G154900, CUFF.6831.1, Phvul.001G200300, CUFF.992.2, Phvul.011G033300, C…
GO:0003723	RNA binding	F	8.73794e-07	1.13593e-07	147	599	6271	13229	UNDER	Phvul.001G130000, Phvul.009G229700, Phvul.009G036100, Phvul.007G279800, Phvul.008G036900, Phvul.009G116900, Phvul.004G168100, Phvul.008G204800, Phvul.003G050400, Phvul.003G120600, Phvul.009G216500, Phvul.003G145500, Phvul.003G205600, Phvul.011G011500, Phvul.005G058000, Phvul.004G080900, Phvul.008G249300, Phvul.006G080900, Phvul.003G046700, Phvul.002G325900, Phvul.011G086500, Phvul.006G175600, Phv…	Phvul.005G086200, Phvul.010G130700, CUFF.6153.1, Phvul.011G079400, Phvul.002G050400, Phvul.005G054600, Phvul.009G134600, Phvul.011G013800, Phvul.004G077200, Phvul.006G143600, CUFF.4467.1, Phvul.003G159100, Phvul.002G155700, Phvul.004G046700, Phvul.001G191400, Phvul.002G302500, CUFF.3282.2, Phvul.009G142000, Phvul.003G049700, Phvul.007G207400, Phvul.011G181200, Phvul.001G032800, CUFF.532.2, Phvul.…
GO:0010467	gene expression	P	1.00567e-06	1.35765e-07	124	530	6294	13298	UNDER	Phvul.002G289600, Phvul.009G036100, Phvul.003G285400, Phvul.005G090300, Phvul.008G229700, Phvul.008G256400, Phvul.011G109300, Phvul.008G036900, Phvul.002G256400, Phvul.009G116900, Phvul.002G256000, Phvul.009G239100, Phvul.011G011500, Phvul.001G201000, Phvul.009G094100, Phvul.004G174900, Phvul.001G155700, Phvul.008G249300, Phvul.005G004500, Phvul.003G046700, Phvul.008G174500, Phvul.007G029400, Phv…	Phvul.003G025600, CUFF.3173.1, Phvul.003G094500, Phvul.004G065100, Phvul.007G092200, Phvul.003G105600, Phvul.009G032700, CUFF.3730.1, Phvul.011G079400, Phvul.002G050400, CUFF.4662.1, Phvul.011G126600, Phvul.003G159100, Phvul.002G266200, Phvul.004G046700, Phvul.006G063600, Phvul.002G322100, CUFF.2867.1, Phvul.007G278700, Phvul.003G219500, CUFF.1332.1, Phvul.009G052300, CUFF.992.2, Phvul.003G276400…
GO:0032991	macromolecular complex	C	2.12277e-05	3.2903e-06	135	543	6283	13285	UNDER	Phvul.001G130000, Phvul.002G289600, Phvul.003G285400, Phvul.008G229700, Phvul.008G256400, Phvul.011G109300, Phvul.008G036900, Phvul.002G256400, Phvul.004G168100, Phvul.002G203700, Phvul.008G204800, Phvul.002G256000, Phvul.003G205600, Phvul.011G011500, Phvul.005G058000, Phvul.001G201000, Phvul.009G094100, Phvul.004G080900, Phvul.003G046700, Phvul.008G174500, Phvul.008G136100, Phvul.011G086500, Phv…	Phvul.001G079900, Phvul.003G094500, Phvul.004G065100, Phvul.007G092200, Phvul.010G130700, Phvul.011G079400, Phvul.002G050400, CUFF.4662.1, Phvul.005G054600, Phvul.011G206600, Phvul.009G134600, Phvul.006G143600, Phvul.006G145900, Phvul.011G126600, Phvul.003G159100, Phvul.002G155700, Phvul.003G262000, Phvul.002G266200, Phvul.004G046700, Phvul.006G063600, Phvul.007G207400, CUFF.2867.1, Phvul.007G278…
GO:0030529	intracellular ribonucleoprotein complex	C	2.12277e-05	3.2903e-06	135	543	6283	13285	UNDER	Phvul.001G130000, Phvul.002G289600, Phvul.003G285400, Phvul.008G229700, Phvul.008G256400, Phvul.011G109300, Phvul.008G036900, Phvul.002G256400, Phvul.004G168100, Phvul.002G203700, Phvul.008G204800, Phvul.002G256000, Phvul.003G205600, Phvul.011G011500, Phvul.005G058000, Phvul.001G201000, Phvul.009G094100, Phvul.004G080900, Phvul.003G046700, Phvul.008G174500, Phvul.008G136100, Phvul.011G086500, Phv…	Phvul.001G079900, Phvul.003G094500, Phvul.004G065100, Phvul.007G092200, Phvul.010G130700, Phvul.011G079400, Phvul.002G050400, CUFF.4662.1, Phvul.005G054600, Phvul.011G206600, Phvul.009G134600, Phvul.006G143600, Phvul.006G145900, Phvul.011G126600, Phvul.003G159100, Phvul.002G155700, Phvul.003G262000, Phvul.002G266200, Phvul.004G046700, Phvul.006G063600, Phvul.007G207400, CUFF.2867.1, Phvul.007G278…
GO:0005840	ribosome	C	2.12277e-05	3.2903e-06	135	543	6283	13285	UNDER	Phvul.001G130000, Phvul.002G289600, Phvul.003G285400, Phvul.008G229700, Phvul.008G256400, Phvul.011G109300, Phvul.008G036900, Phvul.002G256400, Phvul.004G168100, Phvul.002G203700, Phvul.008G204800, Phvul.002G256000, Phvul.003G205600, Phvul.011G011500, Phvul.005G058000, Phvul.001G201000, Phvul.009G094100, Phvul.004G080900, Phvul.003G046700, Phvul.008G174500, Phvul.008G136100, Phvul.011G086500, Phv…	Phvul.001G079900, Phvul.003G094500, Phvul.004G065100, Phvul.007G092200, Phvul.010G130700, Phvul.011G079400, Phvul.002G050400, CUFF.4662.1, Phvul.005G054600, Phvul.011G206600, Phvul.009G134600, Phvul.006G143600, Phvul.006G145900, Phvul.011G126600, Phvul.003G159100, Phvul.002G155700, Phvul.003G262000, Phvul.002G266200, Phvul.004G046700, Phvul.006G063600, Phvul.007G207400, CUFF.2867.1, Phvul.007G278…
GO:1990904	ribonucleoprotein complex	C	2.12277e-05	3.2903e-06	135	543	6283	13285	UNDER	Phvul.001G130000, Phvul.002G289600, Phvul.003G285400, Phvul.008G229700, Phvul.008G256400, Phvul.011G109300, Phvul.008G036900, Phvul.002G256400, Phvul.004G168100, Phvul.002G203700, Phvul.008G204800, Phvul.002G256000, Phvul.003G205600, Phvul.011G011500, Phvul.005G058000, Phvul.001G201000, Phvul.009G094100, Phvul.004G080900, Phvul.003G046700, Phvul.008G174500, Phvul.008G136100, Phvul.011G086500, Phv…	Phvul.001G079900, Phvul.003G094500, Phvul.004G065100, Phvul.007G092200, Phvul.010G130700, Phvul.011G079400, Phvul.002G050400, CUFF.4662.1, Phvul.005G054600, Phvul.011G206600, Phvul.009G134600, Phvul.006G143600, Phvul.006G145900, Phvul.011G126600, Phvul.003G159100, Phvul.002G155700, Phvul.003G262000, Phvul.002G266200, Phvul.004G046700, Phvul.006G063600, Phvul.007G207400, CUFF.2867.1, Phvul.007G278…
GO:0046483	heterocycle metabolic process	P	2.5001e-05	4.37518e-06	869	2399	5549	11429	UNDER	Phvul.003G289600, Phvul.006G208200, Phvul.003G208600, Phvul.004G122100, Phvul.005G050000, Phvul.003G222900, Phvul.002G165500, Phvul.011G011500, Phvul.003G195200, Phvul.008G249300, Phvul.007G262000, Phvul.009G178300, Phvul.005G045900, Phvul.002G232200, Phvul.009G226700, Phvul.010G070200, Phvul.005G142000, Phvul.007G188800, Phvul.003G012400, Phvul.002G036100, Phvul.003G232700, Phvul.002G003400, Phv…	Phvul.007G176800, Phvul.003G094500, Phvul.005G086200, CUFF.5835.1, Phvul.009G032700, Phvul.008G090300, Phvul.007G036500, Phvul.009G168500, CUFF.3776.1, Phvul.010G034100, Phvul.006G143600, Phvul.009G006400, Phvul.002G155700, Phvul.010G080000, Phvul.001G157
GO:1901360	organic cyclic compound metabolic process	P	2.5001e-05	4.37518e-06	869	2399	5549	11429	UNDER	Phvul.003G289600, Phvul.006G208200, Phvul.003G208600, Phvul.004G122100, Phvul.005G050000, Phvul.003G222900, Phvul.002G165500, Phvul.011G011500, Phvul.003G195200, Phvul.008G249300, Phvul.007G262000, Phvul.009G178300, Phvul.005G045900, Phvul.002G232200, Phvul.009G226700, Phvul.010G070200, Phvul.005G142000, Phvul.007G188800, Phvul.003G012400, Phvul.002G036100, Phvul.003G232700, Phvul.002G003400, Phv…	Phvul.007G176800, Phvul.003G094500, Phvul.005G086200, CUFF.5835.1, Phvul.009G032700, Phvul.008G090300, Phvul.007G036500, Phvul.009G168500, CUFF.3776.1, Phvul.010G034100, Phvul.006G143600, Phvul.009G006400, Phvul.002G155700, Phvul.010G080000, Phvul.001G157
GO:0006139	nucleobase-containing compound metabolic process	P	2.5001e-05	4.37518e-06	869	2399	5549	11429	UNDER	Phvul.003G289600, Phvul.006G208200, Phvul.003G208600, Phvul.004G122100, Phvul.005G050000, Phvul.003G222900, Phvul.002G165500, Phvul.011G011500, Phvul.003G195200, Phvul.008G249300, Phvul.007G262000, Phvul.009G178300, Phvul.005G045900, Phvul.002G232200, Phvul.009G226700, Phvul.010G070200, Phvul.005G142000, Phvul.007G188800, Phvul.003G012400, Phvul.002G036100, Phvul.003G232700, Phvul.002G003400, Phv…	Phvul.007G176800, Phvul.003G094500, Phvul.005G086200, CUFF.5835.1, Phvul.009G032700, Phvul.008G090300, Phvul.007G036500, Phvul.009G168500, CUFF.3776.1, Phvul.010G034100, Phvul.006G143600, Phvul.009G006400, Phvul.002G155700, Phvul.010G080000, Phvul.001G157
GO:0006725	cellular aromatic compound metabolic process	P	2.5001e-05	4.37518e-06	869	2399	5549	11429	UNDER	Phvul.003G289600, Phvul.006G208200, Phvul.003G208600, Phvul.004G122100, Phvul.005G050000, Phvul.003G222900, Phvul.002G165500, Phvul.011G011500, Phvul.003G195200, Phvul.008G249300, Phvul.007G262000, Phvul.009G178300, Phvul.005G045900, Phvul.002G232200, Phvul.009G226700, Phvul.010G070200, Phvul.005G142000, Phvul.007G188800, Phvul.003G012400, Phvul.002G036100, Phvul.003G232700, Phvul.002G003400, Phv…	Phvul.007G176800, Phvul.003G094500, Phvul.005G086200, CUFF.5835.1, Phvul.009G032700, Phvul.008G090300, Phvul.007G036500, Phvul.009G168500, CUFF.3776.1, Phvul.010G034100, Phvul.006G143600, Phvul.009G006400, Phvul.002G155700, Phvul.010G080000, Phvul.001G157
GO:0071944	cell periphery	C	2.53621e-05	4.56518e-06	676	1046	5742	12782	OVER	Phvul.001G134600, Phvul.010G073700, Phvul.011G046600, Phvul.007G128600, Phvul.006G208200, Phvul.008G019200, Phvul.011G151800, Phvul.007G222900, Phvul.006G220200, Phvul.007G187700, Phvul.003G279800, Phvul.003G080100, Phvul.008G285400, Phvul.008G029000, Phvul.008G287700, Phvul.003G023300, Phvul.009G123700, Phvul.008G150800, Phvul.006G207100, Phvul.002G049400, Phvul.002G005700, Phvul.007G253300, Phv…	Phvul.001G098300, Phvul.005G015000, Phvul.008G149700, Phvul.010G128500, Phvul.002G220200, Phvul.008G271000, Phvul.010G117600, Phvul.009G227800, CUFF.1366.1, CUFF.4116.1, CUFF.6526.1, Phvul.008G094900, Phvul.001G188100, CUFF.6877.1, Phvul.002G210400, Phvul.009G193700, Phvul.009G216900, Phvul.011G193200, Phvul.002G176400, Phvul.007G172200, Phvul.009G148900, Phvul.002G053900, Phvul.001G076500, Phvul…
GO:0044444	cytoplasmic part	C	0.00013287	2.45809e-05	1105	2934	5313	10894	UNDER	Phvul.003G289600, Phvul.011G216400, Phvul.008G229700, Phvul.002G256400, Phvul.008G055300, Phvul.004G168100, Phvul.004G092600, Phvul.004G031200, Phvul.003G058400, Phvul.001G021800, Phvul.009G183900, Phvul.011G011500, Phvul.008G285400, Phvul.008G029000, Phvul.008G249300, Phvul.007G262000, Phvul.005G065500, Phvul.010G074800, Phvul.010G116500, Phvul.005G074200, Phvul.002G255300, Phvul.005G169700, Phv…	Phvul.002G071100, Phvul.003G264300, Phvul.011G000600, Phvul.003G094500, Phvul.007G092200, Phvul.011G025900, Phvul.011G071800, Phvul.001G199000, CUFF.1825.1, Phvul.001G258300, Phvul.009G032700, Phvul.005G109400, CUFF.4116.1, Phvul.001G142100, Phvul.005G054
GO:0044428	nuclear part	C	0.000133286	2.66571e-05	72	344	6346	13484	UNDER	Phvul.009G122700, Phvul.009G229700, Phvul.007G193100, Phvul.009G036100, Phvul.009G013500, Phvul.011G157300, Phvul.006G208000, Phvul.001G262800, Phvul.007G057400, Phvul.009G168900, Phvul.008G019000, Phvul.007G164500, Phvul.009G183300, Phvul.002G226300, Phvul.003G145500, Phvul.007G273700, Phvul.008G209100, Phvul.011G044300, Phvul.003G195400, Phvul.008G169200, Phvul.001G242300, Phvul.007G255400, Phv…	CUFF.3196.1, Phvul.003G214600, CUFF.3922.1, Phvul.002G237200, CUFF.5063.1, Phvul.010G130700, Phvul.009G015000, Phvul.001G256000, Phvul.001G054600, Phvul.006G136500, Phvul.009G080900, Phvul.011G172500, Phvul.001G260500, Phvul.002G155700, Phvul.011G159400, Phvul.005G048600, Phvul.009G191400, Phvul.007G268100, Phvul.007G172200, CUFF.3957.1, Phvul.001G110400, Phvul.010G131000, Phvul.009G100600, Phvul…
GO:0044446	intracellular organelle part	C	0.000133286	2.66571e-05	72	344	6346	13484	UNDER	Phvul.009G122700, Phvul.009G229700, Phvul.007G193100, Phvul.009G036100, Phvul.009G013500, Phvul.011G157300, Phvul.006G208000, Phvul.001G262800, Phvul.007G057400, Phvul.009G168900, Phvul.008G019000, Phvul.007G164500, Phvul.009G183300, Phvul.002G226300, Phvul.003G145500, Phvul.007G273700, Phvul.008G209100, Phvul.011G044300, Phvul.003G195400, Phvul.008G169200, Phvul.001G242300, Phvul.007G255400, Phv…	CUFF.3196.1, Phvul.003G214600, CUFF.3922.1, Phvul.002G237200, CUFF.5063.1, Phvul.010G130700, Phvul.009G015000, Phvul.001G256000, Phvul.001G054600, Phvul.006G136500, Phvul.009G080900, Phvul.011G172500, Phvul.001G260500, Phvul.002G155700, Phvul.011G159400, Phvul.005G048600, Phvul.009G191400, Phvul.007G268100, Phvul.007G172200, CUFF.3957.1, Phvul.001G110400, Phvul.010G131000, Phvul.009G100600, Phvul…
GO:0044422	organelle part	C	0.000133286	2.66571e-05	72	344	6346	13484	UNDER	Phvul.009G122700, Phvul.009G229700, Phvul.007G193100, Phvul.009G036100, Phvul.009G013500, Phvul.011G157300, Phvul.006G208000, Phvul.001G262800, Phvul.007G057400, Phvul.009G168900, Phvul.008G019000, Phvul.007G164500, Phvul.009G183300, Phvul.002G226300, Phvul.003G145500, Phvul.007G273700, Phvul.008G209100, Phvul.011G044300, Phvul.003G195400, Phvul.008G169200, Phvul.001G242300, Phvul.007G255400, Phv…	CUFF.3196.1, Phvul.003G214600, CUFF.3922.1, Phvul.002G237200, CUFF.5063.1, Phvul.010G130700, Phvul.009G015000, Phvul.001G256000, Phvul.001G054600, Phvul.006G136500, Phvul.009G080900, Phvul.011G172500, Phvul.001G260500, Phvul.002G155700, Phvul.011G159400, Phvul.005G048600, Phvul.009G191400, Phvul.007G268100, Phvul.007G172200, CUFF.3957.1, Phvul.001G110400, Phvul.010G131000, Phvul.009G100600, Phvul…
GO:0016020	membrane	C	0.000159101	3.26158e-05	2561	4847	3857	8981	OVER	Phvul.010G073700, Phvul.008G229700, Phvul.006G208200, Phvul.003G153800, Phvul.007G105600, Phvul.003G188900, Phvul.002G256400, Phvul.011G077100, Phvul.007G147000, Phvul.004G092600, Phvul.008G059900, Phvul.003G149300, Phvul.011G168000, Phvul.004G031200, Phv	Phvul.008G174900, Phvul.005G015000, Phvul.011G000600, Phvul.010G128500, Phvul.004G151900, Phvul.008G275600, Phvul.005G109400, CUFF.1366.1, Phvul.001G031600, Phvul.003G038800, CUFF.5278.1, Phvul.007G220600, Phvul.007G245900, Phvul.005G008700, Phvul.008G079
GO:0003676	nucleic acid binding	F	0.000210988	4.43075e-05	821	2258	5597	11570	UNDER	Phvul.003G208600, Phvul.004G122100, Phvul.004G168100, Phvul.003G222900, Phvul.003G073800, Phvul.002G165500, Phvul.004G011600, Phvul.011G011500, Phvul.003G195200, Phvul.008G249300, Phvul.007G262000, Phvul.009G063200, Phvul.009G178300, Phvul.007G211900, Phvul.009G020700, Phvul.002G232200, Phvul.010G070200, Phvul.005G142000, Phvul.001G062100, Phvul.003G012400, Phvul.003G232700, Phvul.009G190200, Phv…	Phvul.007G176800, Phvul.005G086200, CUFF.5835.1, CUFF.2275.1, Phvul.008G090300, Phvul.005G054600, Phvul.010G034100, Phvul.003G254500, Phvul.006G143600, CUFF.4467.1, Phvul.003G159100, Phvul.002G155700, Phvul.010G080000, Phvul.001G157600, CUFF.6032.1, Phvul
GO:0031974	membrane-enclosed lumen	C	0.000285667	6.57033e-05	61	305	6357	13523	UNDER	Phvul.009G229700, Phvul.007G193100, Phvul.009G036100, Phvul.009G013500, Phvul.011G157300, Phvul.007G057400, Phvul.009G168900, Phvul.008G019000, Phvul.007G164500, Phvul.009G183300, Phvul.002G226300, Phvul.003G145500, Phvul.007G273700, Phvul.008G209100, Phvul.011G044300, Phvul.008G169200, Phvul.007G255400, Phvul.005G020700, Phvul.004G001700, Phvul.006G104500, Phvul.009G087100, Phvul.008G263800, Phv…	CUFF.3196.1, Phvul.003G214600, CUFF.3922.1, CUFF.5063.1, Phvul.010G130700, Phvul.009G015000, Phvul.001G054600, Phvul.006G136500, Phvul.009G080900, Phvul.011G172500, Phvul.002G155700, Phvul.011G159400, Phvul.005G048600, Phvul.009G191400, Phvul.007G268100, CUFF.3957.1, Phvul.001G110400, Phvul.010G131000, Phvul.011G076800, CUFF.807.2, Phvul.010G009800, CUFF.6831.1, CUFF.3995.1, Phvul.001G125200, Phv…
GO:0043233	organelle lumen	C	0.000285667	6.57033e-05	61	305	6357	13523	UNDER	Phvul.009G229700, Phvul.007G193100, Phvul.009G036100, Phvul.009G013500, Phvul.011G157300, Phvul.007G057400, Phvul.009G168900, Phvul.008G019000, Phvul.007G164500, Phvul.009G183300, Phvul.002G226300, Phvul.003G145500, Phvul.007G273700, Phvul.008G209100, Phvul.011G044300, Phvul.008G169200, Phvul.007G255400, Phvul.005G020700, Phvul.004G001700, Phvul.006G104500, Phvul.009G087100, Phvul.008G263800, Phv…	CUFF.3196.1, Phvul.003G214600, CUFF.3922.1, CUFF.5063.1, Phvul.010G130700, Phvul.009G015000, Phvul.001G054600, Phvul.006G136500, Phvul.009G080900, Phvul.011G172500, Phvul.002G155700, Phvul.011G159400, Phvul.005G048600, Phvul.009G191400, Phvul.007G268100, CUFF.3957.1, Phvul.001G110400, Phvul.010G131000, Phvul.011G076800, CUFF.807.2, Phvul.010G009800, CUFF.6831.1, CUFF.3995.1, Phvul.001G125200, Phv…
GO:0070013	intracellular organelle lumen	C	0.000285667	6.57033e-05	61	305	6357	13523	UNDER	Phvul.009G229700, Phvul.007G193100, Phvul.009G036100, Phvul.009G013500, Phvul.011G157300, Phvul.007G057400, Phvul.009G168900, Phvul.008G019000, Phvul.007G164500, Phvul.009G183300, Phvul.002G226300, Phvul.003G145500, Phvul.007G273700, Phvul.008G209100, Phvul.011G044300, Phvul.008G169200, Phvul.007G255400, Phvul.005G020700, Phvul.004G001700, Phvul.006G104500, Phvul.009G087100, Phvul.008G263800, Phv…	CUFF.3196.1, Phvul.003G214600, CUFF.3922.1, CUFF.5063.1, Phvul.010G130700, Phvul.009G015000, Phvul.001G054600, Phvul.006G136500, Phvul.009G080900, Phvul.011G172500, Phvul.002G155700, Phvul.011G159400, Phvul.005G048600, Phvul.009G191400, Phvul.007G268100, CUFF.3957.1, Phvul.001G110400, Phvul.010G131000, Phvul.011G076800, CUFF.807.2, Phvul.010G009800, CUFF.6831.1, CUFF.3995.1, Phvul.001G125200, Phv…
GO:0031981	nuclear lumen	C	0.000285667	6.57033e-05	61	305	6357	13523	UNDER	Phvul.009G229700, Phvul.007G193100, Phvul.009G036100, Phvul.009G013500, Phvul.011G157300, Phvul.007G057400, Phvul.009G168900, Phvul.008G019000, Phvul.007G164500, Phvul.009G183300, Phvul.002G226300, Phvul.003G145500, Phvul.007G273700, Phvul.008G209100, Phvul.011G044300, Phvul.008G169200, Phvul.007G255400, Phvul.005G020700, Phvul.004G001700, Phvul.006G104500, Phvul.009G087100, Phvul.008G263800, Phv…	CUFF.3196.1, Phvul.003G214600, CUFF.3922.1, CUFF.5063.1, Phvul.010G130700, Phvul.009G015000, Phvul.001G054600, Phvul.006G136500, Phvul.009G080900, Phvul.011G172500, Phvul.002G155700, Phvul.011G159400, Phvul.005G048600, Phvul.009G191400, Phvul.007G268100, CUFF.3957.1, Phvul.001G110400, Phvul.010G131000, Phvul.011G076800, CUFF.807.2, Phvul.010G009800, CUFF.6831.1, CUFF.3995.1, Phvul.001G125200, Phv…
GO:0005737	cytoplasm	C	0.000636438	1.49563e-05	1485	3784	4933	10044	UNDER	Phvul.003G289600, Phvul.009G088500, Phvul.011G216400, Phvul.008G229700, Phvul.003G153800, Phvul.011G186900, Phvul.008G019200, Phvul.001G262800, Phvul.002G256400, Phvul.008G055300, Phvul.004G168100, Phvul.005G050000, Phvul.004G092600, Phvul.004G031200, Phvul.009G017300, Phvul.003G058400, Phvul.001G021800, Phvul.009G183900, Phvul.011G011500, Phvul.008G285400, Phvul.008G029000, Phvul.008G249300, Phv…	Phvul.011G000600, Phvul.011G025900, Phvul.011G071800, CUFF.1825.1, Phvul.001G258300, Phvul.009G032700, Phvul.005G109400, Phvul.005G054600, Phvul.006G013100, CUFF.238.2, Phvul.010G034100, CUFF.5278.1, Phvul.002G035000, Phvul.001G063200, Phvul.007G220600, P
GO:0005198	structural molecule activity	F	0.000738217	0.000177172	105	433	6313	13395	UNDER	Phvul.006G069700, Phvul.002G289600, Phvul.003G285400, Phvul.008G229700, Phvul.008G256400, Phvul.011G109300, Phvul.008G036900, Phvul.002G256400, Phvul.002G256000, Phvul.009G017300, Phvul.001G201000, Phvul.009G094100, Phvul.008G021000, Phvul.008G174500, Phvul.011G086500, Phvul.007G070800, Phvul.005G020700, Phvul.010G164300, Phvul.005G167800, Phvul.004G171800, Phvul.003G204100, Phvul.006G110500, Phv…	Phvul.001G079900, Phvul.003G094500, Phvul.004G065100, Phvul.007G092200, Phvul.011G079400, Phvul.002G050400, CUFF.4662.1, Phvul.011G206600, Phvul.009G134600, Phvul.003G231500, Phvul.007G141700, Phvul.006G145900, Phvul.011G126600, Phvul.003G159100, Phvul.002G266200, Phvul.004G046700, Phvul.006G063600, CUFF.2867.1, Phvul.007G278700, CUFF.1332.1, CUFF.992.2, Phvul.003G276400, CUFF.1320.1, Phvul.005G1…
GO:0009536	plastid	C	0.000924307	0.000226455	306	976	6112	12852	UNDER	Phvul.002G180100, Phvul.008G231100, Phvul.003G235300, Phvul.010G165800, Phvul.002G256400, Phvul.007G227800, Phvul.005G184300, Phvul.004G092600, Phvul.007G279000, Phvul.009G025600, Phvul.007G075300, Phvul.002G275600, Phvul.008G285400, Phvul.010G008600, Phvul.004G025200, Phvul.008G249300, Phvul.009G197500, Phvul.009G082400, Phvul.006G170300, Phvul.005G065500, Phvul.007G029400, Phvul.011G086500, Phv…	Phvul.010G048500, Phvul.011G000600, Phvul.007G092200, Phvul.011G071800, CUFF.1825.1, Phvul.001G258300, CUFF.87.2, Phvul.009G032700, CUFF.3730.1, Phvul.005G109400, CUFF.2068.1, Phvul.007G096800, Phvul.002G050400, Phvul.005G054600, CUFF.238.2, Phvul.010G034100, Phvul.009G157600, Phvul.007G000300, CUFF.3414.1, Phvul.003G113100, Phvul.002G266200, Phvul.007G172200, Phvul.009G062100, Phvul.004G068500, …
GO:0016772	transferase activity, transferring phosphorus-containing groups	F	0.00620845	0.00158315	661	1067	5757	12761	OVER	Phvul.003G289600, Phvul.011G216400, Phvul.001G134600, Phvul.011G186900, Phvul.007G050800, Phvul.009G260500, Phvul.008G019200, Phvul.011G151800, Phvul.001G165100, Phvul.011G180000, Phvul.006G191800, Phvul.007G241300, Phvul.009G239900, Phvul.011G042000, Phvul.005G178300, Phvul.011G069600, Phvul.008G205600, Phvul.002G049400, Phvul.007G253300, Phvul.005G074200, Phvul.003G164700, Phvul.004G055400, Phv…	Phvul.008G174900, Phvul.011G182300, Phvul.002G220200, Phvul.008G030000, Phvul.010G117600, Phvul.009G038000, Phvul.005G166200, Phvul.008G159500, Phvul.003G038800, CUFF.5726.1, Phvul.001G188100, CUFF.193.2, CUFF.6877.1, Phvul.004G111200, Phvul.004G136500, Phvul.006G174100, Phvul.011G193200, Phvul.004G068500, Phvul.011G070700, Phvul.007G051900, Phvul.006G106400, CUFF.5036.1, Phvul.001G204900, Phvul.…
GO:0016301	kinase activity	F	0.00620845	0.00158315	661	1067	5757	12761	OVER	Phvul.003G289600, Phvul.011G216400, Phvul.001G134600, Phvul.011G186900, Phvul.007G050800, Phvul.009G260500, Phvul.008G019200, Phvul.011G151800, Phvul.001G165100, Phvul.011G180000, Phvul.006G191800, Phvul.007G241300, Phvul.009G239900, Phvul.011G042000, Phvul.005G178300, Phvul.011G069600, Phvul.008G205600, Phvul.002G049400, Phvul.007G253300, Phvul.005G074200, Phvul.003G164700, Phvul.004G055400, Phv…	Phvul.008G174900, Phvul.011G182300, Phvul.002G220200, Phvul.008G030000, Phvul.010G117600, Phvul.009G038000, Phvul.005G166200, Phvul.008G159500, Phvul.003G038800, CUFF.5726.1, Phvul.001G188100, CUFF.193.2, CUFF.6877.1, Phvul.004G111200, Phvul.004G136500, Phvul.006G174100, Phvul.011G193200, Phvul.004G068500, Phvul.011G070700, Phvul.007G051900, Phvul.006G106400, CUFF.5036.1, Phvul.001G204900, Phvul.…
GO:0030312	external encapsulating structure	C	0.017214	4.5617e-05	168	194	6250	13634	OVER	Phvul.004G096800, Phvul.008G147800, Phvul.011G107000, Phvul.006G208200, Phvul.011G004400, Phvul.003G247800, Phvul.009G053000, Phvul.003G258300, Phvul.009G019200, Phvul.006G077200, Phvul.007G187700, Phvul.003G080100, Phvul.005G122900, Phvul.011G117600, Phvul.001G209400, Phvul.008G285400, Phvul.008G151100, Phvul.009G197100, Phvul.005G174500, Phvul.008G021000, Phvul.006G170300, Phvul.002G170300, Phv…	Phvul.006G088100, Phvul.001G098300, Phvul.005G015000, Phvul.007G088500, Phvul.002G237200, Phvul.001G140600, Phvul.009G227800, Phvul.005G059500, CUFF.6115.1, Phvul.002G201800, Phvul.009G191400, Phvul.009G148900, Phvul.001G217200, Phvul.010G129600, Phvul.009G222100, Phvul.006G108700, Phvul.008G232200, Phvul.009G127500, Phvul.009G018500, Phvul.010G118800, CUFF.3535.1, Phvul.009G142800, Phvul.004G062…
GO:0005618	cell wall	C	0.017214	4.5617e-05	168	194	6250	13634	OVER	Phvul.004G096800, Phvul.008G147800, Phvul.011G107000, Phvul.006G208200, Phvul.011G004400, Phvul.003G247800, Phvul.009G053000, Phvul.003G258300, Phvul.009G019200, Phvul.006G077200, Phvul.007G187700, Phvul.003G080100, Phvul.005G122900, Phvul.011G117600, Phvul.001G209400, Phvul.008G285400, Phvul.008G151100, Phvul.009G197100, Phvul.005G174500, Phvul.008G021000, Phvul.006G170300, Phvul.002G170300, Phv…	Phvul.006G088100, Phvul.001G098300, Phvul.005G015000, Phvul.007G088500, Phvul.002G237200, Phvul.001G140600, Phvul.009G227800, Phvul.005G059500, CUFF.6115.1, Phvul.002G201800, Phvul.009G191400, Phvul.009G148900, Phvul.001G217200, Phvul.010G129600, Phvul.009G222100, Phvul.006G108700, Phvul.008G232200, Phvul.009G127500, Phvul.009G018500, Phvul.010G118800, CUFF.3535.1, Phvul.009G142800, Phvul.004G062…
GO:0005634	nucleus	C	0.179025	0.0483366	700	1886	5718	11942	UNDER	Phvul.005G136900, Phvul.010G000200, Phvul.011G186900, Phvul.003G208600, Phvul.001G262800, Phvul.006G105200, Phvul.005G050000, Phvul.006G162000, Phvul.010G056000, Phvul.003G222900, Phvul.003G073800, Phvul.002G165500, Phvul.011G019100, Phvul.003G252200, Phvul.008G283100, Phvul.003G176800, Phvul.003G195200, Phvul.011G044300, Phvul.003G084700, Phvul.008G169200, Phvul.009G119200, Phvul.008G104900, Phv…	Phvul.002G071100, Phvul.003G264300, Phvul.003G107900, Phvul.005G086200, CUFF.5835.1, Phvul.001G063200, Phvul.003G254500, Phvul.011G172500, Phvul.006G143600, Phvul.009G006400, Phvul.007G082400, Phvul.006G048200, Phvul.002G155700, Phvul.001G157600, CUFF.3282.2, Phvul.011G047700, Phvul.003G068200, Phvul.010G125000, Phvul.008G236000, Phvul.009G052300, Phvul.001G053400, Phvul.005G018500, Phvul.002G278…
GO:0005739	mitochondrion	C	0.221176	0.0608234	162	554	6256	13274	UNDER	Phvul.004G176000, Phvul.009G013500, Phvul.009G151900, Phvul.011G109300, Phvul.002G256400, Phvul.009G116900, Phvul.011G015300, Phvul.004G168100, Phvul.008G202900, Phvul.007G222900, Phvul.003G168500, Phvul.003G205600, Phvul.002G275600, Phvul.008G271400, Phvul.011G011500, Phvul.001G201000, Phvul.008G285400, Phvul.005G088500, Phvul.008G249300, Phvul.003G067400, Phvul.007G029400, Phvul.006G199800, Phv…	Phvul.002G071100, Phvul.007G174500, Phvul.001G079900, Phvul.010G048500, Phvul.001G033900, Phvul.003G069300, Phvul.001G199000, Phvul.003G105600, Phvul.009G032700, CUFF.4662.1, Phvul.011G206600, CUFF.2539.1, CUFF.1900.2, Phvul.008G218800, Phvul.006G145900, Phvul.002G199400, Phvul.003G159100, Phvul.009G191400, Phvul.002G029800, Phvul.006G063600, Phvul.L001300, Phvul.009G142000, Phvul.002G322100, Phv…
GO:0044464	cell part	C	0.0382677	0.10715	2817	6623	3601	7205	UNDER	Phvul.003G289600, Phvul.010G073700, Phvul.008G229700, Phvul.006G208200, Phvul.003G153800, Phvul.003G208600, Phvul.001G262800, Phvul.002G256400, Phvul.004G092600, Phvul.003G222900, Phvul.002G165500, Phvul.004G031200, Phvul.009G107100, Phvul.003G279800, Phv	Phvul.005G015000, Phvul.011G000600, Phvul.003G107900, Phvul.011G025900, Phvul.006G107500, Phvul.009G032700, CUFF.1366.1, Phvul.005G054600, Phvul.010G034100, CUFF.5278.1, Phvul.001G063200, Phvul.008G079500, Phvul.011G126600, Phvul.009G006400, Phvul.009G247
GO:0005730	nucleolus	C	0.653027	0.186113	33	176	6385	13652	UNDER	Phvul.003G096500, Phvul.003G235600, Phvul.007G057400, Phvul.002G279500, Phvul.011G206900, Phvul.009G159600, Phvul.003G145500, Phvul.003G080200, Phvul.007G178000, Phvul.007G273700, Phvul.008G209100, Phvul.004G138700, Phvul.011G044300, Phvul.008G169200, Phvul.001G137800, Phvul.007G255400, Phvul.005G020700, Phvul.010G082900, Phvul.006G104500, Phvul.009G087100, Phvul.008G263800, Phvul.003G123400, Phv…	Phvul.007G126700, Phvul.003G214600, CUFF.3922.1, CUFF.5063.1, Phvul.008G101000, Phvul.007G264700, Phvul.009G015000, Phvul.004G166200, Phvul.011G201300, Phvul.006G136500, Phvul.009G080900, Phvul.011G172500, CUFF.1675.1, CUFF.4448.1, Phvul.011G164600, Phvul.011G159400, Phvul.005G048600, Phvul.009G191400, Phvul.009G247000, Phvul.002G172200, Phvul.007G080500, Phvul.007G268100, Phvul.001G110400, Phvul…
GO:0005886	plasma membrane	C	0.978772	0.283844	530	866	5888	12962	OVER	Phvul.001G134600, Phvul.010G073700, Phvul.011G046600, Phvul.007G128600, Phvul.008G019200, Phvul.011G151800, Phvul.007G222900, Phvul.006G220200, Phvul.003G279800, Phvul.008G029000, Phvul.008G287700, Phvul.003G023300, Phvul.009G123700, Phvul.002G049400, Phvul.002G005700, Phvul.007G253300, Phvul.005G020700, Phvul.002G156900, Phvul.004G144000, Phvul.006G167700, Phvul.008G144000, Phvul.009G236500, Phv…	Phvul.008G149700, Phvul.010G128500, Phvul.002G220200, Phvul.008G271000, Phvul.010G117600, CUFF.1366.1, CUFF.4116.1, CUFF.6526.1, Phvul.008G094900, Phvul.001G188100, CUFF.6877.1, Phvul.002G210400, Phvul.009G193700, Phvul.009G216900, Phvul.011G193200, Phvul.002G176400, Phvul.007G172200, Phvul.002G053900, Phvul.001G076500, Phvul.002G095300, Phvul.010G162400, Phvul.005G078800, CUFF.6187.1, Phvul.004G…
GO:0005576	extracellular region	C	2.08555	0.615237	200	270	6218	13558	OVER	Phvul.009G252200, Phvul.006G208200, Phvul.001G218400, Phvul.006G075700, Phvul.006G077200, Phvul.007G187700, Phvul.002G058000, Phvul.011G134100, Phvul.009G210800, Phvul.002G170300, Phvul.008G150800, Phvul.006G207100, Phvul.003G213400, Phvul.001G003700, Phvul.011G127000, Phvul.011G024800, Phvul.005G154900, Phvul.003G236500, Phvul.005G076500, Phvul.001G143300, Phvul.004G051600, Phvul.002G311100, Phv…	Phvul.001G098300, Phvul.006G197100, Phvul.005G015000, CUFF.5100.1, Phvul.007G235300, Phvul.009G227800, Phvul.005G059500, Phvul.002G201800, Phvul.006G011600, Phvul.010G115300, Phvul.003G273700, Phvul.008G199400, Phvul.001G217200, Phvul.004G087000, CUFF.532.2, Phvul.009G222100, Phvul.008G232200, Phvul.009G127500, Phvul.003G055700, CUFF.3535.1, Phvul.005G072700, Phvul.007G076500, Phvul.009G142800, P…
GO:0019748	secondary metabolic process	P	0.021536	0.0064608	142	173	6276	13655	OVER	Phvul.008G277500, Phvul.004G021800, Phvul.001G145500, Phvul.006G054200, Phvul.005G054200, Phvul.010G063500, Phvul.008G032700, Phvul.001G120600, Phvul.002G080100, Phvul.010G063900, Phvul.008G247400, Phvul.009G029000, Phvul.002G025200, Phvul.004G159500, Phvul.007G257500, Phvul.003G213400, Phvul.010G022400, Phvul.005G039100, Phvul.011G020200, Phvul.005G183600, Phvul.007G106300, Phvul.007G102100, Phv…	CUFF.359.1, Phvul.004G021400, Phvul.003G153000, Phvul.002G025600, Phvul.001G216100, Phvul.004G159900, Phvul.007G086200, Phvul.010G077100, Phvul.011G092500, CUFF.1343.1, Phvul.003G147000, Phvul.002G094500, Phvul.010G013000, Phvul.001G122100, Phvul.006G054600, Phvul.001G145100, Phvul.008G107100, Phvul.001G124400, Phvul.006G079100, Phvul.001G145900, Phvul.010G115300, Phvul.002G268500, Phvul.004G1192…
GO:0044237	cellular metabolic process	P	2.77661	0.856024	1741	4218	4677	9610	UNDER	Phvul.003G289600, Phvul.008G229700, Phvul.006G208200, Phvul.003G153800, Phvul.003G208600, Phvul.002G256400, Phvul.004G122100, Phvul.004G092600, Phvul.003G222900, Phvul.002G165500, Phvul.006G084300, Phvul.003G195200, Phvul.008G249300, Phvul.007G262000, Phvul.011G042000, Phvul.009G178300, Phvul.005G074200, Phvul.004G169200, Phvul.010G070200, Phvul.005G142000, Phvul.007G188800, Phvul.006G185000, Phv…	Phvul.008G174900, Phvul.007G176800, Phvul.005G086200, Phvul.009G032700, Phvul.009G038000, Phvul.005G109400, CUFF.1366.1, Phvul.007G036500, CUFF.3776.1, Phvul.010G034100, Phvul.003G038800, Phvul.001G063200, Phvul.011G126600, CUFF.6877.1, Phvul.009G006400,
GO:0005654	nucleoplasm	C	2.77661	0.860749	30	159	6388	13669	UNDER	Phvul.009G229700, Phvul.007G193100, Phvul.009G036100, Phvul.009G170600, Phvul.009G013500, Phvul.011G157300, Phvul.001G224500, Phvul.009G168900, Phvul.008G019000, Phvul.007G164500, Phvul.009G183300, Phvul.011G206900, Phvul.002G226300, Phvul.001G224300, Phvul.009G228100, Phvul.004G001700, Phvul.005G146700, Phvul.006G185800, Phvul.002G078600, Phvul.006G187600, Phvul.005G185100, Phvul.010G125600, Phv…	CUFF.3196.1, CUFF.3922.1, CUFF.2851.1, Phvul.008G101000, Phvul.010G130700, Phvul.001G056500, Phvul.004G166200, CUFF.3192.1, Phvul.001G054600, Phvul.009G004500, CUFF.4448.1, Phvul.002G304400, Phvul.010G044300, Phvul.005G040600, Phvul.002G155700, CUFF.3957.1, Phvul.003G104000, Phvul.001G156000, Phvul.002G104500, Phvul.010G099000, CUFF.3995.1, Phvul.002G227900, Phvul.004G074500, Phvul.005G016200, Ph…
GO:0005623	cell	C	2.82975	0.89137	2906	6775	3512	7053	UNDER	Phvul.003G289600, Phvul.010G073700, Phvul.008G229700, Phvul.006G208200, Phvul.003G153800, Phvul.003G208600, Phvul.001G262800, Phvul.002G256400, Phvul.004G092600, Phvul.003G222900, Phvul.002G165500, Phvul.004G031200, Phvul.009G107100, Phvul.003G279800, Phv	Phvul.005G015000, Phvul.011G000600, Phvul.003G107900, Phvul.011G025900, Phvul.006G107500, Phvul.009G032700, CUFF.1366.1, Phvul.005G054600, Phvul.010G034100, CUFF.5278.1, Phvul.001G063200, Phvul.008G079500, Phvul.011G126600, Phvul.009G006400, Phvul.009G247
GO:0016043	cellular component organization	P	6.801	2.21032	424	1178	5994	12650	UNDER	Phvul.001G159900, Phvul.003G153800, Phvul.004G168100, Phvul.011G019100, Phvul.008G029000, Phvul.008G171400, Phvul.006G207100, Phvul.009G188000, Phvul.011G020200, Phvul.009G020700, Phvul.003G274100, Phvul.005G142000, Phvul.002G060100, Phvul.002G311100, Phvul.006G144800, Phvul.002G213900, Phvul.007G114200, Phvul.007G263100, Phvul.001G192500, Phvul.007G151600, Phvul.001G098200, Phvul.002G291500, Phv…	Phvul.001G098300, Phvul.005G015000, Phvul.003G264300, Phvul.006G042900, CUFF.5835.1, Phvul.006G132700, CUFF.6526.1, Phvul.002G050400, Phvul.008G218800, Phvul.009G247400, Phvul.007G082400, CUFF.3414.1, Phvul.002G300200, Phvul.009G148900, Phvul.007G207400, CUFF.6141.1, Phvul.009G062100, Phvul.002G324400, Phvul.001G026000, Phvul.009G222100, Phvul.010G125000, Phvul.008G236000, Phvul.009G052300, Phvul…
GO:0071840	cellular component organization or biogenesis	P	6.801	2.21032	424	1178	5994	12650	UNDER	Phvul.001G159900, Phvul.003G153800, Phvul.004G168100, Phvul.011G019100, Phvul.008G029000, Phvul.008G171400, Phvul.006G207100, Phvul.009G188000, Phvul.011G020200, Phvul.009G020700, Phvul.003G274100, Phvul.005G142000, Phvul.002G060100, Phvul.002G311100, Phvul.006G144800, Phvul.002G213900, Phvul.007G114200, Phvul.007G263100, Phvul.001G192500, Phvul.007G151600, Phvul.001G098200, Phvul.002G291500, Phv…	Phvul.001G098300, Phvul.005G015000, Phvul.003G264300, Phvul.006G042900, CUFF.5835.1, Phvul.006G132700, CUFF.6526.1, Phvul.002G050400, Phvul.008G218800, Phvul.009G247400, Phvul.007G082400, CUFF.3414.1, Phvul.002G300200, Phvul.009G148900, Phvul.007G207400, CUFF.6141.1, Phvul.009G062100, Phvul.002G324400, Phvul.001G026000, Phvul.009G222100, Phvul.010G125000, Phvul.008G236000, Phvul.009G052300, Phvul…
GO:0004518	nuclease activity	F	16.279	5.45346	38	175	6380	13653	UNDER	Phvul.009G036100, Phvul.002G130600, Phvul.010G004400, Phvul.007G231200, Phvul.011G109000, Phvul.007G057400, Phvul.004G122100, Phvul.002G279500, Phvul.008G183100, Phvul.009G159600, Phvul.001G012000, Phvul.002G084500, Phvul.002G170800, Phvul.011G103500, Phvul.002G103800, Phvul.002G084600, Phvul.005G170100, Phvul.011G097400, Phvul.007G261800, Phvul.008G234500, Phvul.002G001900, Phvul.010G110200, Phv…	Phvul.007G092600, Phvul.009G231500, CUFF.5063.1, Phvul.007G088100, Phvul.007G105200, CUFF.4432.1, Phvul.001G128600, CUFF.6153.1, Phvul.001G147400, Phvul.010G034100, Phvul.008G111600, Phvul.004G117300, Phvul.002G228200, Phvul.004G077200, Phvul.007G243600, Phvul.008G111200, Phvul.008G245500, Phvul.007G249300, Phvul.002G191800, CUFF.4968.1, Phvul.002G178700, Phvul.001G032800, Phvul.003G261600, Phvul…
GO:0016788	hydrolase activity, acting on ester bonds	F	16.279	5.45346	38	175	6380	13653	UNDER	Phvul.009G036100, Phvul.002G130600, Phvul.010G004400, Phvul.007G231200, Phvul.011G109000, Phvul.007G057400, Phvul.004G122100, Phvul.002G279500, Phvul.008G183100, Phvul.009G159600, Phvul.001G012000, Phvul.002G084500, Phvul.002G170800, Phvul.011G103500, Phvul.002G103800, Phvul.002G084600, Phvul.005G170100, Phvul.011G097400, Phvul.007G261800, Phvul.008G234500, Phvul.002G001900, Phvul.010G110200, Phv…	Phvul.007G092600, Phvul.009G231500, CUFF.5063.1, Phvul.007G088100, Phvul.007G105200, CUFF.4432.1, Phvul.001G128600, CUFF.6153.1, Phvul.001G147400, Phvul.010G034100, Phvul.008G111600, Phvul.004G117300, Phvul.002G228200, Phvul.004G077200, Phvul.007G243600, Phvul.008G111200, Phvul.008G245500, Phvul.007G249300, Phvul.002G191800, CUFF.4968.1, Phvul.002G178700, Phvul.001G032800, Phvul.003G261600, Phvul…
GO:0044710	single-organism metabolic process	P	21.5001	7.31002	409	667	6009	13161	OVER	Phvul.009G200200, Phvul.003G188900, Phvul.006G050400, Phvul.001G145500, Phvul.010G063900, Phvul.002G153400, Phvul.002G025200, Phvul.004G159500, Phvul.005G039100, Phvul.011G020200, Phvul.004G089300, Phvul.005G135800, Phvul.011G022500, Phvul.007G102100, Phvul.009G226700, Phvul.007G010100, Phvul.003G114200, Phvul.006G144800, Phvul.003G206400, Phvul.004G135300, Phvul.003G232700, Phvul.009G244000, Phv…	CUFF.359.1, Phvul.004G021400, Phvul.008G191000, Phvul.003G243600, Phvul.006G130400, Phvul.011G161600, CUFF.1825.1, Phvul.011G092500, Phvul.003G184300, CUFF.1343.1, Phvul.003G147000, CUFF.6756.1, Phvul.003G239100, Phvul.001G142100, Phvul.009G113900, Phvul.009G199000, Phvul.010G115300, Phvul.007G117700, Phvul.001G222100, Phvul.005G101800, Phvul.006G122900, Phvul.002G268500, Phvul.007G205100, Phvul.…
GO:0016740	transferase activity	F	60.2745	2.07947	1423	2705	4995	11123	OVER	Phvul.003G289600, Phvul.011G216400, Phvul.011G186900, Phvul.007G050800, Phvul.008G019200, Phvul.003G188900, Phvul.011G151800, Phvul.003G275200, Phvul.003G058400, Phvul.002G145900, Phvul.001G021800, Phvul.009G183900, Phvul.007G241300, Phvul.010G143900, Phvul.006G117300, Phvul.003G233800, Phvul.011G042000, Phvul.002G115000, Phvul.008G195600, Phvul.002G072200, Phvul.002G049400, Phvul.007G253300, Phv…	Phvul.001G098300, Phvul.006G212700, Phvul.008G174900, Phvul.011G182300, CUFF.4828.1, Phvul.011G025900, CUFF.1825.1, Phvul.011G136400, CUFF.6779.1, Phvul.009G038000, CUFF.1366.1, Phvul.003G163600, CUFF.3523.1, Phvul.010G034100, Phvul.003G038800, CUFF.193.2
GO:0005215	transporter activity	F	65.4046	22.8916	480	814	5938	13014	OVER	Phvul.010G073700, Phvul.011G046600, Phvul.007G128600, Phvul.007G153800, Phvul.010G126200, Phvul.010G119900, Phvul.007G013500, Phvul.006G164300, Phvul.003G279800, Phvul.009G210000, Phvul.002G283900, Phvul.007G079100, Phvul.005G155300, Phvul.003G023300, Phvul.009G123700, Phvul.004G001900, Phvul.001G108200, Phvul.002G005700, Phvul.005G020700, Phvul.002G156900, Phvul.004G144000, Phvul.003G183200, Phv…	Phvul.008G149700, Phvul.003G069300, Phvul.001G237600, Phvul.001G073000, Phvul.002G277100, Phvul.008G094900, Phvul.007G220600, Phvul.008G079500, Phvul.002G210400, Phvul.003G228200, Phvul.002G176400, Phvul.001G131200, Phvul.001G076500, CUFF.6372.1, Phvul.002G095300, Phvul.001G030500, Phvul.004G012700, CUFF.5681.1, CUFF.5221.1, Phvul.007G047400, Phvul.002G154600, Phvul.002G301300, Phvul.009G194800, …
GO:0044421	extracellular region part	C	100.255	35.5907	30	19	6388	13809	OVER	Phvul.003G155400, Phvul.009G013600, Phvul.011G132100, Phvul.011G132000, Phvul.006G208200, Phvul.003G130600, Phvul.008G273000, Phvul.011G132800, Phvul.011G130800, Phvul.011G130900, Phvul.011G008700, Phvul.011G134000, Phvul.011G134100, Phvul.011G126700, Phvul.009G067300, Phvul.006G176500, Phvul.005G080600, Phvul.009G062300, Phvul.011G131400, Phvul.003G240800, Phvul.011G127000, Phvul.011G133200, Phv…	Phvul.011G133600, Phvul.011G127100, Phvul.009G227100, Phvul.002G239300, Phvul.011G127300, Phvul.009G013000, Phvul.011G132900, Phvul.003G051500, Phvul.011G131700, Phvul.005G072700, CUFF.580.1, Phvul.011G009200, Phvul.009G010800, Phvul.001G009900, Phvul.009G008200, Phvul.001G024500, Phvul.009G008100, Phvul.011G081100, Phvul.006G048700
GO:0005615	extracellular space	C	135.405	48.7457	28	18	6390	13810	OVER	Phvul.003G155400, Phvul.009G013600, Phvul.011G132100, Phvul.011G132000, Phvul.003G130600, Phvul.008G273000, Phvul.011G132800, Phvul.011G130800, Phvul.011G130900, Phvul.011G008700, Phvul.011G134000, Phvul.011G134100, Phvul.011G126700, Phvul.009G067300, Phvul.006G176500, Phvul.005G080600, Phvul.009G062300, Phvul.011G131400, Phvul.003G240800, Phvul.011G127000, Phvul.011G133200, Phvul.011G131200, Phv…	Phvul.011G133600, Phvul.011G127100, Phvul.009G227100, Phvul.002G239300, Phvul.011G127300, Phvul.009G013000, Phvul.011G132900, Phvul.011G131700, Phvul.005G072700, CUFF.580.1, Phvul.011G009200, Phvul.009G010800, Phvul.001G009900, Phvul.009G008200, Phvul.001G024500, Phvul.009G008100, Phvul.011G081100, Phvul.006G048700
GO:0044260	cellular macromolecule metabolic process	P	278.538	101.666	964	2378	5454	11450	UNDER	Phvul.011G216400, Phvul.008G229700, Phvul.003G153800, Phvul.011G186900, Phvul.008G019200, Phvul.002G256400, Phvul.011G151800, Phvul.004G122100, Phvul.004G092600, Phvul.009G183900, Phvul.011G011500, Phvul.007G241300, Phvul.006G088900, Phvul.003G195200, Phvul.003G233800, Phvul.008G249300, Phvul.011G042000, Phvul.002G049400, Phvul.005G045900, Phvul.007G253300, Phvul.005G074200, Phvul.004G169200, Phv…	Phvul.008G174900, Phvul.007G176800, Phvul.011G182300, Phvul.003G094500, Phvul.007G092200, CUFF.5835.1, Phvul.009G032700, Phvul.009G038000, CUFF.1366.1, Phvul.003G163600, CUFF.6526.1, Phvul.010G034100, Phvul.003G038800, Phvul.001G063200, Phvul.011G126600,
GO:0009579	thylakoid	C	294.397	108.927	63	230	6355	13598	UNDER	Phvul.002G180100, Phvul.003G132500, Phvul.011G025300, Phvul.010G002100, Phvul.009G092400, Phvul.008G141300, Phvul.005G184300, Phvul.004G092600, Phvul.003G011200, Phvul.003G275400, Phvul.011G061600, Phvul.011G086700, Phvul.007G055900, Phvul.009G241100, Phvul.006G084300, Phvul.004G025200, Phvul.008G193700, Phvul.011G086300, Phvul.010G097300, Phvul.010G133500, Phvul.007G209300, Phvul.002G137800, Phv…	Phvul.003G000300, Phvul.002G262400, Phvul.009G225500, Phvul.001G094500, Phvul.001G258300, Phvul.002G035800, Phvul.005G109400, Phvul.004G075700, Phvul.004G128200, Phvul.003G256800, Phvul.001G039200, Phvul.006G143600, CUFF.6552.1, Phvul.010G120100, Phvul.005G025600, Phvul.001G151500, Phvul.009G062100, Phvul.004G093000, Phvul.003G211100, Phvul.001G257100, Phvul.006G146300, Phvul.004G127000, Phvul.00…
GO:0007049	cell cycle	P	925.199	346.95	39	156	6379	13672	UNDER	Phvul.007G067700, Phvul.003G235000, Phvul.011G023800, Phvul.005G132500, Phvul.007G019100, Phvul.010G056000, Phvul.011G019100, Phvul.008G128100, Phvul.006G220200, Phvul.005G113500, Phvul.006G160500, Phvul.006G122800, Phvul.006G048500, Phvul.003G155000, Phvul.009G174500, Phvul.003G002000, Phvul.003G177100, Phvul.008G144200, Phvul.004G106800, Phvul.010G020000, Phvul.009G175800, Phvul.009G228500, Phv…	CUFF.5835.1, Phvul.001G235300, CUFF.4620.1, Phvul.003G170700, Phvul.008G157200, Phvul.004G034600, Phvul.008G243600, Phvul.007G247800, Phvul.001G144000, Phvul.011G086900, Phvul.006G073000, Phvul.008G268900, Phvul.009G105600, Phvul.001G245100, Phvul.007G084300, Phvul.006G044000, Phvul.007G044000, Phvul.002G082400, CUFF.5650.2, Phvul.011G088400, Phvul.001G151100, Phvul.007G172200, Phvul.009G040200, …
GO:0065007	biological regulation	P	100.344	381.307	384	661	6034	13167	OVER	Phvul.011G048900, Phvul.007G153800, Phvul.005G136900, Phvul.011G186900, Phvul.001G201400, Phvul.009G160100, Phvul.006G220200, Phvul.008G160500, Phvul.007G032700, Phvul.005G027100, Phvul.007G160900, Phvul.007G079100, Phvul.006G153400, Phvul.005G178300, Phvul.010G065400, Phvul.010G022000, Phvul.010G160900, Phvul.008G234500, Phvul.007G253300, Phvul.010G116500, Phvul.005G074200, Phvul.005G076500, Phv…	CUFF.2580.1, Phvul.008G088100, Phvul.010G130700, Phvul.001G235300, Phvul.006G107500, Phvul.010G117600, CUFF.4116.1, CUFF.4892.1, Phvul.002G038400, Phvul.006G038400, Phvul.001G063200, Phvul.001G188100, Phvul.009G237600, Phvul.011G036800, Phvul.001G247400, CUFF.1584.1, Phvul.007G107900, Phvul.005G101800, Phvul.010G086900, Phvul.003G068200, Phvul.011G070700, CUFF.2821.2, Phvul.008G265900, Phvul.002G…
GO:0044699	single-organism process	P	1109.39	427.115	1010	1916	5408	11912	OVER	Phvul.003G285000, Phvul.011G186900, Phvul.008G019200, Phvul.003G188900, Phvul.011G151800, Phvul.001G201400, Phvul.010G058300, Phvul.008G160500, Phvul.010G063900, Phvul.008G029000, Phvul.006G153400, Phvul.002G025200, Phvul.007G210800, Phvul.007G253300, Phvul.011G020200, Phvul.009G020700, Phvul.010G116500, Phvul.005G074200, Phvul.007G102100, Phvul.009G226700, Phvul.007G010100, Phvul.003G114200, Phv…	Phvul.004G021400, Phvul.008G191000, CUFF.5835.1, CUFF.1825.1, Phvul.006G107500, Phvul.009G032700, CUFF.4116.1, Phvul.006G038400, Phvul.001G142100, Phvul.001G063200, Phvul.009G237600, CUFF.6877.1, CUFF.4214.1, CUFF.1584.1, Phvul.006G018800, Phvul.007G257900, Phvul.003G068200, Phvul.011G148400, Phvul.010G125000, Phvul.002G278200, Phvul.005G031500, Phvul.003G140500, Phvul.001G171900, Phvul.007G24020…
GO:0005829	cytosol	C	1822.85	710.912	262	715	6156	13113	UNDER	Phvul.003G289600, Phvul.007G281200, Phvul.001G266600, Phvul.009G200200, Phvul.008G036900, Phvul.003G126300, Phvul.007G222900, Phvul.006G220200, Phvul.004G143600, Phvul.003G145500, Phvul.001G252200, Phvul.011G011500, Phvul.008G249300, Phvul.006G151100, Phvul.005G065500, Phvul.007G029400, Phvul.011G210300, Phvul.002G213100, Phvul.003G213400, Phvul.002G288800, Phvul.007G091000, Phvul.008G259900, Phv…	Phvul.003G025600, Phvul.002G107500, Phvul.003G264300, Phvul.003G094500, Phvul.009G086200, Phvul.003G105600, CUFF.1825.1, CUFF.3730.1, Phvul.011G079400, Phvul.002G050400, Phvul.001G054600, Phvul.008G046700, Phvul.004G111200, CUFF.6624.1, Phvul.003G159100, Phvul.007G084700, Phvul.008G193300, Phvul.004G046700, CUFF.4565.2, Phvul.011G047700, CUFF.807.2, CUFF.1332.1, Phvul.001G200300, CUFF.992.2, Phvu…
GO:0004872	receptor activity	F	1996.98	798.793	43	45	6375	13783	OVER	Phvul.009G252300, Phvul.008G036200, Phvul.011G216400, Phvul.003G285500, Phvul.008G285800, Phvul.003G270900, Phvul.011G153600, Phvul.007G153800, Phvul.001G165500, Phvul.007G273300, Phvul.010G165200, Phvul.003G015500, Phvul.007G206800, Phvul.002G063900, Phvul.002G117500, Phvul.002G224200, Phvul.004G086300, Phvul.008G000600, Phvul.009G252900, Phvul.002G207000, Phvul.010G065400, Phvul.003G287100, Phv…	Phvul.002G046300, Phvul.008G206700, Phvul.008G122200, Phvul.006G208100, Phvul.003G109700, Phvul.009G153900, Phvul.009G252400, Phvul.003G270600, Phvul.007G168600, CUFF.5438.1, CUFF.4891.1, CUFF.4892.1, Phvul.008G292200, Phvul.002G052600, Phvul.007G166200, Phvul.002G063700, Phvul.007G271700, Phvul.009G239400, CUFF.1903.1, Phvul.008G220600, Phvul.001G063200, Phvul.011G119200, CUFF.1906.1, Phvul.005G…
GO:0060089	molecular transducer activity	F	1996.98	798.793	43	45	6375	13783	OVER	Phvul.009G252300, Phvul.008G036200, Phvul.011G216400, Phvul.003G285500, Phvul.008G285800, Phvul.003G270900, Phvul.011G153600, Phvul.007G153800, Phvul.001G165500, Phvul.007G273300, Phvul.010G165200, Phvul.003G015500, Phvul.007G206800, Phvul.002G063900, Phvul.002G117500, Phvul.002G224200, Phvul.004G086300, Phvul.008G000600, Phvul.009G252900, Phvul.002G207000, Phvul.010G065400, Phvul.003G287100, Phv…	Phvul.002G046300, Phvul.008G206700, Phvul.008G122200, Phvul.006G208100, Phvul.003G109700, Phvul.009G153900, Phvul.009G252400, Phvul.003G270600, Phvul.007G168600, CUFF.5438.1, CUFF.4891.1, CUFF.4892.1, Phvul.008G292200, Phvul.002G052600, Phvul.007G166200, Phvul.002G063700, Phvul.007G271700, Phvul.009G239400, CUFF.1903.1, Phvul.008G220600, Phvul.001G063200, Phvul.011G119200, CUFF.1906.1, Phvul.005G…
GO:0065008	regulation of biological quality	P	3378.3	1401.99	113	164	6305	13664	OVER	Phvul.007G153800, Phvul.005G182400, Phvul.001G165500, Phvul.009G030000, Phvul.001G169300, Phvul.003G273300, Phvul.007G079100, Phvul.002G205200, Phvul.008G044000, Phvul.006G153400, Phvul.001G179100, Phvul.003G219900, Phvul.L008200, Phvul.002G068100, Phvul.002G292900, Phvul.001G143700, Phvul.009G031500, Phvul.003G034700, Phvul.008G221800, Phvul.007G177200, Phvul.002G322900, Phvul.005G028700, Phvul.…	CUFF.2580.1, Phvul.007G038000, Phvul.007G088500, Phvul.010G159400, Phvul.002G113500, Phvul.007G227400, Phvul.005G067000, Phvul.004G161300, Phvul.004G052700, Phvul.001G203300, Phvul.008G080900, Phvul.001G250300, CUFF.3033.1, Phvul.001G090300, Phvul.001G197100, Phvul.003G201000, Phvul.001G247400, Phvul.005G170300, CUFF.6289.1, Phvul.005G025600, Phvul.010G086900, Phvul.011G061200, Phvul.007G155300, …
GO:0042592	homeostatic process	P	3378.3	1401.99	113	164	6305	13664	OVER	Phvul.007G153800, Phvul.005G182400, Phvul.001G165500, Phvul.009G030000, Phvul.001G169300, Phvul.003G273300, Phvul.007G079100, Phvul.002G205200, Phvul.008G044000, Phvul.006G153400, Phvul.001G179100, Phvul.003G219900, Phvul.L008200, Phvul.002G068100, Phvul.002G292900, Phvul.001G143700, Phvul.009G031500, Phvul.003G034700, Phvul.008G221800, Phvul.007G177200, Phvul.002G322900, Phvul.005G028700, Phvul.…	CUFF.2580.1, Phvul.007G038000, Phvul.007G088500, Phvul.010G159400, Phvul.002G113500, Phvul.007G227400, Phvul.005G067000, Phvul.004G161300, Phvul.004G052700, Phvul.001G203300, Phvul.008G080900, Phvul.001G250300, CUFF.3033.1, Phvul.001G090300, Phvul.001G197100, Phvul.003G201000, Phvul.001G247400, Phvul.005G170300, CUFF.6289.1, Phvul.005G025600, Phvul.010G086900, Phvul.011G061200, Phvul.007G155300, …
GO:0019725	cellular homeostasis	P	3378.3	1401.99	113	164	6305	13664	OVER	Phvul.007G153800, Phvul.005G182400, Phvul.001G165500, Phvul.009G030000, Phvul.001G169300, Phvul.003G273300, Phvul.007G079100, Phvul.002G205200, Phvul.008G044000, Phvul.006G153400, Phvul.001G179100, Phvul.003G219900, Phvul.L008200, Phvul.002G068100, Phvul.002G292900, Phvul.001G143700, Phvul.009G031500, Phvul.003G034700, Phvul.008G221800, Phvul.007G177200, Phvul.002G322900, Phvul.005G028700, Phvul.…	CUFF.2580.1, Phvul.007G038000, Phvul.007G088500, Phvul.010G159400, Phvul.002G113500, Phvul.007G227400, Phvul.005G067000, Phvul.004G161300, Phvul.004G052700, Phvul.001G203300, Phvul.008G080900, Phvul.001G250300, CUFF.3033.1, Phvul.001G090300, Phvul.001G197100, Phvul.003G201000, Phvul.001G247400, Phvul.005G170300, CUFF.6289.1, Phvul.005G025600, Phvul.010G086900, Phvul.011G061200, Phvul.007G155300, …
GO:0050896	response to stimulus	P	3517.78	1528.97	769	1448	5649	12380	OVER	Phvul.009G088500, Phvul.011G216400, Phvul.011G186900, Phvul.011G151800, Phvul.001G201400, Phvul.004G092600, Phvul.003G222900, Phvul.002G165500, Phvul.007G187700, Phvul.008G160500, Phvul.003G279800, Phvul.004G036900, Phvul.008G285400, Phvul.002G209400, Phvul.003G195200, Phvul.007G210800, Phvul.006G207100, Phvul.002G049400, Phvul.005G045900, Phvul.007G253300, Phvul.006G133800, Phvul.010G116500, Phv…	Phvul.001G132300, Phvul.003G107900, CUFF.5835.1, Phvul.002G220200, Phvul.006G107500, Phvul.010G117600, Phvul.007G101000, CUFF.1366.1, CUFF.4116.1, CUFF.4892.1, Phvul.006G038400, Phvul.005G166200, Phvul.001G063200, Phvul.001G188100, CUFF.698.1, Phvul.009G237600, Phvul.011G036800, CUFF.6877.1, CUFF.4214.1, Phvul.009G006400, CUFF.1584.1, Phvul.011G193200, Phvul.001G099400, Phvul.003G068200, Phvul.01…
GO:1901265	nucleoside phosphate binding	F	3517.78	1530.24	1091	2107	5327	11721	OVER	Phvul.003G289600, Phvul.009G088500, Phvul.003G268900, Phvul.011G186900, Phvul.004G147400, Phvul.008G019200, Phvul.011G151800, Phvul.009G017300, Phvul.004G011600, Phvul.004G036900, Phvul.007G241300, Phvul.008G285400, Phvul.008G249300, Phvul.008G080500, Phvul.007G262000, Phvul.009G063200, Phvul.011G042000, Phvul.002G049400, Phvul.007G253300, Phvul.011G020200, Phvul.003G183200, Phvul.002G200600, Phv…	Phvul.008G174900, Phvul.001G132300, Phvul.011G182300, Phvul.001G199000, Phvul.001G226700, Phvul.009G032700, Phvul.006G052700, Phvul.009G038000, CUFF.4116.1, CUFF.2275.1, Phvul.006G038400, Phvul.005G090700, Phvul.005G054600, Phvul.009G136900, CUFF.5692.1,
GO:0036094	small molecule binding	F	3517.78	1530.24	1091	2107	5327	11721	OVER	Phvul.003G289600, Phvul.009G088500, Phvul.003G268900, Phvul.011G186900, Phvul.004G147400, Phvul.008G019200, Phvul.011G151800, Phvul.009G017300, Phvul.004G011600, Phvul.004G036900, Phvul.007G241300, Phvul.008G285400, Phvul.008G249300, Phvul.008G080500, Phvul.007G262000, Phvul.009G063200, Phvul.011G042000, Phvul.002G049400, Phvul.007G253300, Phvul.011G020200, Phvul.003G183200, Phvul.002G200600, Phv…	Phvul.008G174900, Phvul.001G132300, Phvul.011G182300, Phvul.001G199000, Phvul.001G226700, Phvul.009G032700, Phvul.006G052700, Phvul.009G038000, CUFF.4116.1, CUFF.2275.1, Phvul.006G038400, Phvul.005G090700, Phvul.005G054600, Phvul.009G136900, CUFF.5692.1,
GO:0000166	nucleotide binding	F	3517.78	1530.24	1091	2107	5327	11721	OVER	Phvul.003G289600, Phvul.009G088500, Phvul.003G268900, Phvul.011G186900, Phvul.004G147400, Phvul.008G019200, Phvul.011G151800, Phvul.009G017300, Phvul.004G011600, Phvul.004G036900, Phvul.007G241300, Phvul.008G285400, Phvul.008G249300, Phvul.008G080500, Phvul.007G262000, Phvul.009G063200, Phvul.011G042000, Phvul.002G049400, Phvul.007G253300, Phvul.011G020200, Phvul.003G183200, Phvul.002G200600, Phv…	Phvul.008G174900, Phvul.001G132300, Phvul.011G182300, Phvul.001G199000, Phvul.001G226700, Phvul.009G032700, Phvul.006G052700, Phvul.009G038000, CUFF.4116.1, CUFF.2275.1, Phvul.006G038400, Phvul.005G090700, Phvul.005G054600, Phvul.009G136900, CUFF.5692.1,
GO:0006464	cellular protein modification process	P	4505.27	2027.37	759	1434	5659	12394	OVER	Phvul.011G216400, Phvul.001G134600, Phvul.003G153800, Phvul.011G186900, Phvul.009G260500, Phvul.008G019200, Phvul.011G151800, Phvul.001G165100, Phvul.006G162000, Phvul.004G092600, Phvul.002G084300, Phvul.009G183900, Phvul.007G241300, Phvul.006G088900, Phvul.009G239900, Phvul.003G233800, Phvul.011G042000, Phvul.011G069600, Phvul.009G119200, Phvul.008G205600, Phvul.002G049400, Phvul.007G253300, Phv…	Phvul.008G174900, CUFF.5583.2, Phvul.011G182300, Phvul.003G103300, Phvul.009G248500, Phvul.002G220200, Phvul.008G030000, Phvul.010G117600, Phvul.009G038000, CUFF.1366.1, Phvul.003G163600, CUFF.4892.1, CUFF.6526.1, Phvul.008G159500, Phvul.003G038800, Phvul.001G063200, Phvul.001G188100, CUFF.698.1, Phvul.005G119200, CUFF.6877.1, Phvul.009G006400, Phvul.002G235700, Phvul.007G082400, Phvul.004G136500…
GO:0036211	protein modification process	P	4505.27	2027.37	759	1434	5659	12394	OVER	Phvul.011G216400, Phvul.001G134600, Phvul.003G153800, Phvul.011G186900, Phvul.009G260500, Phvul.008G019200, Phvul.011G151800, Phvul.001G165100, Phvul.006G162000, Phvul.004G092600, Phvul.002G084300, Phvul.009G183900, Phvul.007G241300, Phvul.006G088900, Phvul.009G239900, Phvul.003G233800, Phvul.011G042000, Phvul.011G069600, Phvul.009G119200, Phvul.008G205600, Phvul.002G049400, Phvul.007G253300, Phv…	Phvul.008G174900, CUFF.5583.2, Phvul.011G182300, Phvul.003G103300, Phvul.009G248500, Phvul.002G220200, Phvul.008G030000, Phvul.010G117600, Phvul.009G038000, CUFF.1366.1, Phvul.003G163600, CUFF.4892.1, CUFF.6526.1, Phvul.008G159500, Phvul.003G038800, Phvul.001G063200, Phvul.001G188100, CUFF.698.1, Phvul.005G119200, CUFF.6877.1, Phvul.009G006400, Phvul.002G235700, Phvul.007G082400, Phvul.004G136500…
GO:0043412	macromolecule modification	P	4505.27	2027.37	759	1434	5659	12394	OVER	Phvul.011G216400, Phvul.001G134600, Phvul.003G153800, Phvul.011G186900, Phvul.009G260500, Phvul.008G019200, Phvul.011G151800, Phvul.001G165100, Phvul.006G162000, Phvul.004G092600, Phvul.002G084300, Phvul.009G183900, Phvul.007G241300, Phvul.006G088900, Phvul.009G239900, Phvul.003G233800, Phvul.011G042000, Phvul.011G069600, Phvul.009G119200, Phvul.008G205600, Phvul.002G049400, Phvul.007G253300, Phv…	Phvul.008G174900, CUFF.5583.2, Phvul.011G182300, Phvul.003G103300, Phvul.009G248500, Phvul.002G220200, Phvul.008G030000, Phvul.010G117600, Phvul.009G038000, CUFF.1366.1, Phvul.003G163600, CUFF.4892.1, CUFF.6526.1, Phvul.008G159500, Phvul.003G038800, Phvul.001G063200, Phvul.001G188100, CUFF.698.1, Phvul.005G119200, CUFF.6877.1, Phvul.009G006400, Phvul.002G235700, Phvul.007G082400, Phvul.004G136500…
GO:0005975	carbohydrate metabolic process	P	5193.49	2363.04	368	652	6050	13176	OVER	Phvul.003G289600, Phvul.009G252200, Phvul.008G015400, Phvul.011G077900, Phvul.003G241300, Phvul.006G208200, Phvul.009G116500, Phvul.001G218400, Phvul.006G109800, Phvul.003G188900, Phvul.003G258300, Phvul.003G079900, Phvul.002G033500, Phvul.007G222900, Phvul.006G050400, Phvul.010G058300, Phvul.006G109000, Phvul.004G143600, Phvul.001G021800, Phvul.009G103300, Phvul.007G218400, Phvul.005G002600, Phv…	Phvul.001G098300, Phvul.001G109400, CUFF.2580.1, Phvul.005G015000, CUFF.5353.1, Phvul.008G271000, Phvul.003G184300, CUFF.2045.1, Phvul.009G168500, Phvul.003G035400, Phvul.004G079500, Phvul.008G023700, Phvul.001G239900, Phvul.004G111200, Phvul.001G209000, Phvul.006G122900, CUFF.2177.1, Phvul.010G082300, CUFF.1004.1, Phvul.003G290700, Phvul.009G148900, Phvul.004G022500, Phvul.004G018000, CUFF.4565.…
GO:0043170	macromolecule metabolic process	P	7122.91	3276.54	1190	2809	5228	11019	UNDER	Phvul.009G088500, Phvul.011G216400, Phvul.002G105200, Phvul.008G229700, Phvul.003G153800, Phvul.010G163500, Phvul.011G186900, Phvul.008G019200, Phvul.002G256400, Phvul.011G151800, Phvul.004G122100, Phvul.004G092600, Phvul.009G183900, Phvul.011G011500, Phvul.007G241300, Phvul.006G088900, Phvul.003G195200, Phvul.003G233800, Phvul.008G249300, Phvul.011G042000, Phvul.002G049400, Phvul.005G045900, Phv…	Phvul.002G071100, Phvul.008G174900, Phvul.003G264300, Phvul.007G176800, Phvul.011G182300, Phvul.003G094500, Phvul.007G092200, CUFF.5835.1, Phvul.001G258300, Phvul.009G032700, Phvul.009G038000, CUFF.1366.1, Phvul.002G224800, Phvul.003G163600, CUFF.6526.1,
GO:0017111	nucleoside-triphosphatase activity	F	8412.49	4080.06	26	25	6392	13803	OVER	Phvul.008G281800, Phvul.008G101900, Phvul.003G260200, Phvul.002G289700, Phvul.009G248600, Phvul.006G059300, Phvul.007G124000, Phvul.007G159100, Phvul.002G120200, Phvul.009G067100, Phvul.002G151700, Phvul.009G004100, Phvul.002G111200, Phvul.001G210500, Phvul.001G191500, Phvul.009G014400, Phvul.003G179100, Phvul.007G261400, Phvul.003G127400, Phvul.001G038000, Phvul.008G274700, Phvul.007G217400, Phv…	CUFF.5582.1, Phvul.001G264500, Phvul.006G094300, Phvul.003G241500, Phvul.003G279200, Phvul.006G052700, Phvul.002G218100, Phvul.006G059400, Phvul.005G090700, Phvul.011G038800, CUFF.196.1, Phvul.008G075500, Phvul.004G113500, Phvul.011G040700, Phvul.010G149700, Phvul.003G002200, Phvul.007G195700, Phvul.011G070000, Phvul.001G024200, Phvul.009G201300, Phvul.007G014600, Phvul.009G135700, Phvul.005G1679…
GO:0016817	hydrolase activity, acting on acid anhydrides	F	8412.49	4080.06	26	25	6392	13803	OVER	Phvul.008G281800, Phvul.008G101900, Phvul.003G260200, Phvul.002G289700, Phvul.009G248600, Phvul.006G059300, Phvul.007G124000, Phvul.007G159100, Phvul.002G120200, Phvul.009G067100, Phvul.002G151700, Phvul.009G004100, Phvul.002G111200, Phvul.001G210500, Phvul.001G191500, Phvul.009G014400, Phvul.003G179100, Phvul.007G261400, Phvul.003G127400, Phvul.001G038000, Phvul.008G274700, Phvul.007G217400, Phv…	CUFF.5582.1, Phvul.001G264500, Phvul.006G094300, Phvul.003G241500, Phvul.003G279200, Phvul.006G052700, Phvul.002G218100, Phvul.006G059400, Phvul.005G090700, Phvul.011G038800, CUFF.196.1, Phvul.008G075500, Phvul.004G113500, Phvul.011G040700, Phvul.010G149700, Phvul.003G002200, Phvul.007G195700, Phvul.011G070000, Phvul.001G024200, Phvul.009G201300, Phvul.007G014600, Phvul.009G135700, Phvul.005G1679…
GO:0003774	motor activity	F	8412.49	4080.06	26	25	6392	13803	OVER	Phvul.008G281800, Phvul.008G101900, Phvul.003G260200, Phvul.002G289700, Phvul.009G248600, Phvul.006G059300, Phvul.007G124000, Phvul.007G159100, Phvul.002G120200, Phvul.009G067100, Phvul.002G151700, Phvul.009G004100, Phvul.002G111200, Phvul.001G210500, Phvul.001G191500, Phvul.009G014400, Phvul.003G179100, Phvul.007G261400, Phvul.003G127400, Phvul.001G038000, Phvul.008G274700, Phvul.007G217400, Phv…	CUFF.5582.1, Phvul.001G264500, Phvul.006G094300, Phvul.003G241500, Phvul.003G279200, Phvul.006G052700, Phvul.002G218100, Phvul.006G059400, Phvul.005G090700, Phvul.011G038800, CUFF.196.1, Phvul.008G075500, Phvul.004G113500, Phvul.011G040700, Phvul.010G149700, Phvul.003G002200, Phvul.007G195700, Phvul.011G070000, Phvul.001G024200, Phvul.009G201300, Phvul.007G014600, Phvul.009G135700, Phvul.005G1679…
GO:0016462	pyrophosphatase activity	F	8412.49	4080.06	26	25	6392	13803	OVER	Phvul.008G281800, Phvul.008G101900, Phvul.003G260200, Phvul.002G289700, Phvul.009G248600, Phvul.006G059300, Phvul.007G124000, Phvul.007G159100, Phvul.002G120200, Phvul.009G067100, Phvul.002G151700, Phvul.009G004100, Phvul.002G111200, Phvul.001G210500, Phvul.001G191500, Phvul.009G014400, Phvul.003G179100, Phvul.007G261400, Phvul.003G127400, Phvul.001G038000, Phvul.008G274700, Phvul.007G217400, Phv…	CUFF.5582.1, Phvul.001G264500, Phvul.006G094300, Phvul.003G241500, Phvul.003G279200, Phvul.006G052700, Phvul.002G218100, Phvul.006G059400, Phvul.005G090700, Phvul.011G038800, CUFF.196.1, Phvul.008G075500, Phvul.004G113500, Phvul.011G040700, Phvul.010G149700, Phvul.003G002200, Phvul.007G195700, Phvul.011G070000, Phvul.001G024200, Phvul.009G201300, Phvul.007G014600, Phvul.009G135700, Phvul.005G1679…
GO:0016818	hydrolase activity, acting on acid anhydrides, in phosphorus-containing anhydrides	F	8412.49	4080.06	26	25	6392	13803	OVER	Phvul.008G281800, Phvul.008G101900, Phvul.003G260200, Phvul.002G289700, Phvul.009G248600, Phvul.006G059300, Phvul.007G124000, Phvul.007G159100, Phvul.002G120200, Phvul.009G067100, Phvul.002G151700, Phvul.009G004100, Phvul.002G111200, Phvul.001G210500, Phvul.001G191500, Phvul.009G014400, Phvul.003G179100, Phvul.007G261400, Phvul.003G127400, Phvul.001G038000, Phvul.008G274700, Phvul.007G217400, Phv…	CUFF.5582.1, Phvul.001G264500, Phvul.006G094300, Phvul.003G241500, Phvul.003G279200, Phvul.006G052700, Phvul.002G218100, Phvul.006G059400, Phvul.005G090700, Phvul.011G038800, CUFF.196.1, Phvul.008G075500, Phvul.004G113500, Phvul.011G040700, Phvul.010G149700, Phvul.003G002200, Phvul.007G195700, Phvul.011G070000, Phvul.001G024200, Phvul.009G201300, Phvul.007G014600, Phvul.009G135700, Phvul.005G1679…
GO:0006950	response to stress	P	906.041	4439.6	446	815	5972	13013	OVER	Phvul.009G088500, Phvul.002G293700, Phvul.007G153800, Phvul.006G075700, Phvul.011G151800, Phvul.006G162000, Phvul.007G222900, Phvul.006G200600, Phvul.007G187700, Phvul.004G036900, Phvul.008G285400, Phvul.002G209400, Phvul.003G195200, Phvul.007G210800, Phvul.009G119200, Phvul.006G207100, Phvul.002G049400, Phvul.005G045900, Phvul.005G039100, Phvul.004G066200, Phvul.002G156900, Phvul.006G133800, Phv…	Phvul.001G132300, Phvul.003G107900, CUFF.5835.1, Phvul.002G220200, Phvul.007G101000, CUFF.1366.1, CUFF.698.1, Phvul.009G237600, CUFF.6877.1, Phvul.009G006400, Phvul.011G193200, Phvul.001G099400, CUFF.2821.2, Phvul.006G110900, Phvul.004G009500, Phvul.001G121400, Phvul.009G076500, Phvul.005G031500, Phvul.008G217700, Phvul.003G140500, CUFF.4478.1, Phvul.001G246300, Phvul.001G194800, CUFF.5169.2, Phv…

## Sheet: Myc-Ctrl vs. Myc-Strss
GO-ID	Term	Category	FDR	P-Value	#Test	#Ref	#notAnnotTest	#notAnnotRef	Over/Under	TestSeqs	RefSeqs
GO:0006807	nitrogen compound metabolic process	P	9.94826e-16	9.94826e-18	990	2749	5766	10741	UNDER	Phvul.006G208200, Phvul.003G208600, Phvul.002G256400, Phvul.004G122100, Phvul.005G050000, Phvul.011G011500, Phvul.002G155700, Phvul.003G195200, Phvul.007G262000, Phvul.009G178300, Phvul.006G063600, Phvul.005G045900, Phvul.011G116800, Phvul.002G232200, Phvul.009G226700, Phvul.010G070200, Phvul.008G236000, Phvul.001G016200, Phvul.005G142000, Phvul.003G012400, Phvul.002G036100, Phvul.003G232700, Phv…	Phvul.003G289600, Phvul.007G176800, Phvul.003G094500, Phvul.007G092200, Phvul.008G229700, Phvul.005G086200, CUFF.5835.1, Phvul.009G032700, Phvul.008G090300, Phvul.007G036500, Phvul.009G168500, CUFF.3776.1, Phvul.003G222900, Phvul.002G165500, Phvul.010G034
GO:0034641	cellular nitrogen compound metabolic process	P	9.94826e-16	9.94826e-18	990	2749	5766	10741	UNDER	Phvul.006G208200, Phvul.003G208600, Phvul.002G256400, Phvul.004G122100, Phvul.005G050000, Phvul.011G011500, Phvul.002G155700, Phvul.003G195200, Phvul.007G262000, Phvul.009G178300, Phvul.006G063600, Phvul.005G045900, Phvul.011G116800, Phvul.002G232200, Phvul.009G226700, Phvul.010G070200, Phvul.008G236000, Phvul.001G016200, Phvul.005G142000, Phvul.003G012400, Phvul.002G036100, Phvul.003G232700, Phv…	Phvul.003G289600, Phvul.007G176800, Phvul.003G094500, Phvul.007G092200, Phvul.008G229700, Phvul.005G086200, CUFF.5835.1, Phvul.009G032700, Phvul.008G090300, Phvul.007G036500, Phvul.009G168500, CUFF.3776.1, Phvul.003G222900, Phvul.002G165500, Phvul.010G034
GO:0043229	intracellular organelle	C	6.00057e-14	1.20011e-15	1732	4333	5024	9157	UNDER	Phvul.003G107900, Phvul.011G025900, Phvul.003G208600, Phvul.001G262800, Phvul.002G256400, Phvul.005G109400, Phvul.004G092600, Phvul.005G054600, Phvul.004G031200, Phvul.003G058400, Phvul.001G021800, Phvul.008G285400, Phvul.002G155700, Phvul.003G195200, Phvul.007G262000, Phvul.003G084700, Phvul.010G116500, Phvul.010G070200, Phvul.008G236000, Phvul.005G142000, Phvul.003G062900, Phvul.007G001400, Phv…	Phvul.011G000600, Phvul.008G229700, Phvul.005G086200, Phvul.011G071800, CUFF.1825.1, Phvul.001G258300, Phvul.009G032700, Phvul.006G052700, Phvul.003G222900, Phvul.006G013100, CUFF.238.2, Phvul.010G034100, Phvul.002G035000, Phvul.001G063200, Phvul.007G2206
GO:0043226	organelle	C	6.00057e-14	1.20011e-15	1732	4333	5024	9157	UNDER	Phvul.003G107900, Phvul.011G025900, Phvul.003G208600, Phvul.001G262800, Phvul.002G256400, Phvul.005G109400, Phvul.004G092600, Phvul.005G054600, Phvul.004G031200, Phvul.003G058400, Phvul.001G021800, Phvul.008G285400, Phvul.002G155700, Phvul.003G195200, Phvul.007G262000, Phvul.003G084700, Phvul.010G116500, Phvul.010G070200, Phvul.008G236000, Phvul.005G142000, Phvul.003G062900, Phvul.007G001400, Phv…	Phvul.011G000600, Phvul.008G229700, Phvul.005G086200, Phvul.011G071800, CUFF.1825.1, Phvul.001G258300, Phvul.009G032700, Phvul.006G052700, Phvul.003G222900, Phvul.006G013100, CUFF.238.2, Phvul.010G034100, Phvul.002G035000, Phvul.001G063200, Phvul.007G2206
GO:0044424	intracellular part	C	1.6554e-12	8.94546e-14	2143	5154	4613	8336	UNDER	Phvul.003G107900, Phvul.011G025900, Phvul.003G153800, Phvul.003G208600, Phvul.001G262800, Phvul.002G256400, Phvul.005G109400, Phvul.004G092600, Phvul.005G054600, Phvul.004G031200, Phvul.003G058400, Phvul.001G021800, Phvul.006G084300, Phvul.008G285400, Phv	Phvul.011G000600, Phvul.008G229700, Phvul.005G086200, Phvul.011G071800, CUFF.1825.1, Phvul.001G258300, Phvul.009G032700, Phvul.006G052700, Phvul.003G222900, Phvul.006G013100, CUFF.238.2, Phvul.010G034100, CUFF.5278.1, Phvul.002G035000, Phvul.001G063200, P
GO:0044271	cellular nitrogen compound biosynthetic process	P	1.6554e-12	1.40709e-13	103	499	6653	12991	UNDER	Phvul.002G300600, Phvul.002G289600, Phvul.009G036100, Phvul.006G122100, Phvul.003G285400, Phvul.002G237600, Phvul.011G109300, Phvul.007G180500, Phvul.002G256400, Phvul.009G116900, Phvul.006G120200, Phvul.002G256000, Phvul.002G011200, Phvul.009G239100, Phvul.011G011500, Phvul.011G015700, Phvul.001G201000, Phvul.009G094100, Phvul.009G042100, Phvul.011G086500, Phvul.006G063600, Phvul.007G278700, Phv…	Phvul.003G025600, CUFF.3173.1, Phvul.003G094500, Phvul.004G065100, Phvul.007G092200, Phvul.008G229700, Phvul.003G105600, Phvul.008G036900, Phvul.009G032700, CUFF.3730.1, Phvul.011G079400, Phvul.002G050400, CUFF.4662.1, Phvul.011G126600, Phvul.004G174900, Phvul.008G249300, Phvul.003G159100, Phvul.002G266200, Phvul.004G046700, Phvul.002G322100, CUFF.2867.1, Phvul.005G020700, Phvul.003G219500, CUFF.…
GO:0043603	cellular amide metabolic process	P	1.6554e-12	1.40709e-13	103	499	6653	12991	UNDER	Phvul.002G300600, Phvul.002G289600, Phvul.009G036100, Phvul.006G122100, Phvul.003G285400, Phvul.002G237600, Phvul.011G109300, Phvul.007G180500, Phvul.002G256400, Phvul.009G116900, Phvul.006G120200, Phvul.002G256000, Phvul.002G011200, Phvul.009G239100, Phvul.011G011500, Phvul.011G015700, Phvul.001G201000, Phvul.009G094100, Phvul.009G042100, Phvul.011G086500, Phvul.006G063600, Phvul.007G278700, Phv…	Phvul.003G025600, CUFF.3173.1, Phvul.003G094500, Phvul.004G065100, Phvul.007G092200, Phvul.008G229700, Phvul.003G105600, Phvul.008G036900, Phvul.009G032700, CUFF.3730.1, Phvul.011G079400, Phvul.002G050400, CUFF.4662.1, Phvul.011G126600, Phvul.004G174900, Phvul.008G249300, Phvul.003G159100, Phvul.002G266200, Phvul.004G046700, Phvul.002G322100, CUFF.2867.1, Phvul.005G020700, Phvul.003G219500, CUFF.…
GO:0044249	cellular biosynthetic process	P	1.6554e-12	1.40709e-13	103	499	6653	12991	UNDER	Phvul.002G300600, Phvul.002G289600, Phvul.009G036100, Phvul.006G122100, Phvul.003G285400, Phvul.002G237600, Phvul.011G109300, Phvul.007G180500, Phvul.002G256400, Phvul.009G116900, Phvul.006G120200, Phvul.002G256000, Phvul.002G011200, Phvul.009G239100, Phvul.011G011500, Phvul.011G015700, Phvul.001G201000, Phvul.009G094100, Phvul.009G042100, Phvul.011G086500, Phvul.006G063600, Phvul.007G278700, Phv…	Phvul.003G025600, CUFF.3173.1, Phvul.003G094500, Phvul.004G065100, Phvul.007G092200, Phvul.008G229700, Phvul.003G105600, Phvul.008G036900, Phvul.009G032700, CUFF.3730.1, Phvul.011G079400, Phvul.002G050400, CUFF.4662.1, Phvul.011G126600, Phvul.004G174900, Phvul.008G249300, Phvul.003G159100, Phvul.002G266200, Phvul.004G046700, Phvul.002G322100, CUFF.2867.1, Phvul.005G020700, Phvul.003G219500, CUFF.…
GO:1901576	organic substance biosynthetic process	P	1.6554e-12	1.40709e-13	103	499	6653	12991	UNDER	Phvul.002G300600, Phvul.002G289600, Phvul.009G036100, Phvul.006G122100, Phvul.003G285400, Phvul.002G237600, Phvul.011G109300, Phvul.007G180500, Phvul.002G256400, Phvul.009G116900, Phvul.006G120200, Phvul.002G256000, Phvul.002G011200, Phvul.009G239100, Phvul.011G011500, Phvul.011G015700, Phvul.001G201000, Phvul.009G094100, Phvul.009G042100, Phvul.011G086500, Phvul.006G063600, Phvul.007G278700, Phv…	Phvul.003G025600, CUFF.3173.1, Phvul.003G094500, Phvul.004G065100, Phvul.007G092200, Phvul.008G229700, Phvul.003G105600, Phvul.008G036900, Phvul.009G032700, CUFF.3730.1, Phvul.011G079400, Phvul.002G050400, CUFF.4662.1, Phvul.011G126600, Phvul.004G174900, Phvul.008G249300, Phvul.003G159100, Phvul.002G266200, Phvul.004G046700, Phvul.002G322100, CUFF.2867.1, Phvul.005G020700, Phvul.003G219500, CUFF.…
GO:0006518	peptide metabolic process	P	1.6554e-12	1.40709e-13	103	499	6653	12991	UNDER	Phvul.002G300600, Phvul.002G289600, Phvul.009G036100, Phvul.006G122100, Phvul.003G285400, Phvul.002G237600, Phvul.011G109300, Phvul.007G180500, Phvul.002G256400, Phvul.009G116900, Phvul.006G120200, Phvul.002G256000, Phvul.002G011200, Phvul.009G239100, Phvul.011G011500, Phvul.011G015700, Phvul.001G201000, Phvul.009G094100, Phvul.009G042100, Phvul.011G086500, Phvul.006G063600, Phvul.007G278700, Phv…	Phvul.003G025600, CUFF.3173.1, Phvul.003G094500, Phvul.004G065100, Phvul.007G092200, Phvul.008G229700, Phvul.003G105600, Phvul.008G036900, Phvul.009G032700, CUFF.3730.1, Phvul.011G079400, Phvul.002G050400, CUFF.4662.1, Phvul.011G126600, Phvul.004G174900, Phvul.008G249300, Phvul.003G159100, Phvul.002G266200, Phvul.004G046700, Phvul.002G322100, CUFF.2867.1, Phvul.005G020700, Phvul.003G219500, CUFF.…
GO:1901566	organonitrogen compound biosynthetic process	P	1.6554e-12	1.40709e-13	103	499	6653	12991	UNDER	Phvul.002G300600, Phvul.002G289600, Phvul.009G036100, Phvul.006G122100, Phvul.003G285400, Phvul.002G237600, Phvul.011G109300, Phvul.007G180500, Phvul.002G256400, Phvul.009G116900, Phvul.006G120200, Phvul.002G256000, Phvul.002G011200, Phvul.009G239100, Phvul.011G011500, Phvul.011G015700, Phvul.001G201000, Phvul.009G094100, Phvul.009G042100, Phvul.011G086500, Phvul.006G063600, Phvul.007G278700, Phv…	Phvul.003G025600, CUFF.3173.1, Phvul.003G094500, Phvul.004G065100, Phvul.007G092200, Phvul.008G229700, Phvul.003G105600, Phvul.008G036900, Phvul.009G032700, CUFF.3730.1, Phvul.011G079400, Phvul.002G050400, CUFF.4662.1, Phvul.011G126600, Phvul.004G174900, Phvul.008G249300, Phvul.003G159100, Phvul.002G266200, Phvul.004G046700, Phvul.002G322100, CUFF.2867.1, Phvul.005G020700, Phvul.003G219500, CUFF.…
GO:0043043	peptide biosynthetic process	P	1.6554e-12	1.40709e-13	103	499	6653	12991	UNDER	Phvul.002G300600, Phvul.002G289600, Phvul.009G036100, Phvul.006G122100, Phvul.003G285400, Phvul.002G237600, Phvul.011G109300, Phvul.007G180500, Phvul.002G256400, Phvul.009G116900, Phvul.006G120200, Phvul.002G256000, Phvul.002G011200, Phvul.009G239100, Phvul.011G011500, Phvul.011G015700, Phvul.001G201000, Phvul.009G094100, Phvul.009G042100, Phvul.011G086500, Phvul.006G063600, Phvul.007G278700, Phv…	Phvul.003G025600, CUFF.3173.1, Phvul.003G094500, Phvul.004G065100, Phvul.007G092200, Phvul.008G229700, Phvul.003G105600, Phvul.008G036900, Phvul.009G032700, CUFF.3730.1, Phvul.011G079400, Phvul.002G050400, CUFF.4662.1, Phvul.011G126600, Phvul.004G174900, Phvul.008G249300, Phvul.003G159100, Phvul.002G266200, Phvul.004G046700, Phvul.002G322100, CUFF.2867.1, Phvul.005G020700, Phvul.003G219500, CUFF.…
GO:0034645	cellular macromolecule biosynthetic process	P	1.6554e-12	1.40709e-13	103	499	6653	12991	UNDER	Phvul.002G300600, Phvul.002G289600, Phvul.009G036100, Phvul.006G122100, Phvul.003G285400, Phvul.002G237600, Phvul.011G109300, Phvul.007G180500, Phvul.002G256400, Phvul.009G116900, Phvul.006G120200, Phvul.002G256000, Phvul.002G011200, Phvul.009G239100, Phvul.011G011500, Phvul.011G015700, Phvul.001G201000, Phvul.009G094100, Phvul.009G042100, Phvul.011G086500, Phvul.006G063600, Phvul.007G278700, Phv…	Phvul.003G025600, CUFF.3173.1, Phvul.003G094500, Phvul.004G065100, Phvul.007G092200, Phvul.008G229700, Phvul.003G105600, Phvul.008G036900, Phvul.009G032700, CUFF.3730.1, Phvul.011G079400, Phvul.002G050400, CUFF.4662.1, Phvul.011G126600, Phvul.004G174900, Phvul.008G249300, Phvul.003G159100, Phvul.002G266200, Phvul.004G046700, Phvul.002G322100, CUFF.2867.1, Phvul.005G020700, Phvul.003G219500, CUFF.…
GO:0009059	macromolecule biosynthetic process	P	1.6554e-12	1.40709e-13	103	499	6653	12991	UNDER	Phvul.002G300600, Phvul.002G289600, Phvul.009G036100, Phvul.006G122100, Phvul.003G285400, Phvul.002G237600, Phvul.011G109300, Phvul.007G180500, Phvul.002G256400, Phvul.009G116900, Phvul.006G120200, Phvul.002G256000, Phvul.002G011200, Phvul.009G239100, Phvul.011G011500, Phvul.011G015700, Phvul.001G201000, Phvul.009G094100, Phvul.009G042100, Phvul.011G086500, Phvul.006G063600, Phvul.007G278700, Phv…	Phvul.003G025600, CUFF.3173.1, Phvul.003G094500, Phvul.004G065100, Phvul.007G092200, Phvul.008G229700, Phvul.003G105600, Phvul.008G036900, Phvul.009G032700, CUFF.3730.1, Phvul.011G079400, Phvul.002G050400, CUFF.4662.1, Phvul.011G126600, Phvul.004G174900, Phvul.008G249300, Phvul.003G159100, Phvul.002G266200, Phvul.004G046700, Phvul.002G322100, CUFF.2867.1, Phvul.005G020700, Phvul.003G219500, CUFF.…
GO:0043604	amide biosynthetic process	P	1.6554e-12	1.40709e-13	103	499	6653	12991	UNDER	Phvul.002G300600, Phvul.002G289600, Phvul.009G036100, Phvul.006G122100, Phvul.003G285400, Phvul.002G237600, Phvul.011G109300, Phvul.007G180500, Phvul.002G256400, Phvul.009G116900, Phvul.006G120200, Phvul.002G256000, Phvul.002G011200, Phvul.009G239100, Phvul.011G011500, Phvul.011G015700, Phvul.001G201000, Phvul.009G094100, Phvul.009G042100, Phvul.011G086500, Phvul.006G063600, Phvul.007G278700, Phv…	Phvul.003G025600, CUFF.3173.1, Phvul.003G094500, Phvul.004G065100, Phvul.007G092200, Phvul.008G229700, Phvul.003G105600, Phvul.008G036900, Phvul.009G032700, CUFF.3730.1, Phvul.011G079400, Phvul.002G050400, CUFF.4662.1, Phvul.011G126600, Phvul.004G174900, Phvul.008G249300, Phvul.003G159100, Phvul.002G266200, Phvul.004G046700, Phvul.002G322100, CUFF.2867.1, Phvul.005G020700, Phvul.003G219500, CUFF.…
GO:1901564	organonitrogen compound metabolic process	P	1.6554e-12	1.40709e-13	103	499	6653	12991	UNDER	Phvul.002G300600, Phvul.002G289600, Phvul.009G036100, Phvul.006G122100, Phvul.003G285400, Phvul.002G237600, Phvul.011G109300, Phvul.007G180500, Phvul.002G256400, Phvul.009G116900, Phvul.006G120200, Phvul.002G256000, Phvul.002G011200, Phvul.009G239100, Phvul.011G011500, Phvul.011G015700, Phvul.001G201000, Phvul.009G094100, Phvul.009G042100, Phvul.011G086500, Phvul.006G063600, Phvul.007G278700, Phv…	Phvul.003G025600, CUFF.3173.1, Phvul.003G094500, Phvul.004G065100, Phvul.007G092200, Phvul.008G229700, Phvul.003G105600, Phvul.008G036900, Phvul.009G032700, CUFF.3730.1, Phvul.011G079400, Phvul.002G050400, CUFF.4662.1, Phvul.011G126600, Phvul.004G174900, Phvul.008G249300, Phvul.003G159100, Phvul.002G266200, Phvul.004G046700, Phvul.002G322100, CUFF.2867.1, Phvul.005G020700, Phvul.003G219500, CUFF.…
GO:0006412	translation	P	1.6554e-12	1.40709e-13	103	499	6653	12991	UNDER	Phvul.002G300600, Phvul.002G289600, Phvul.009G036100, Phvul.006G122100, Phvul.003G285400, Phvul.002G237600, Phvul.011G109300, Phvul.007G180500, Phvul.002G256400, Phvul.009G116900, Phvul.006G120200, Phvul.002G256000, Phvul.002G011200, Phvul.009G239100, Phvul.011G011500, Phvul.011G015700, Phvul.001G201000, Phvul.009G094100, Phvul.009G042100, Phvul.011G086500, Phvul.006G063600, Phvul.007G278700, Phv…	Phvul.003G025600, CUFF.3173.1, Phvul.003G094500, Phvul.004G065100, Phvul.007G092200, Phvul.008G229700, Phvul.003G105600, Phvul.008G036900, Phvul.009G032700, CUFF.3730.1, Phvul.011G079400, Phvul.002G050400, CUFF.4662.1, Phvul.011G126600, Phvul.004G174900, Phvul.008G249300, Phvul.003G159100, Phvul.002G266200, Phvul.004G046700, Phvul.002G322100, CUFF.2867.1, Phvul.005G020700, Phvul.003G219500, CUFF.…
GO:0005622	intracellular	C	1.94683e-12	1.75215e-13	2458	5798	4298	7692	UNDER	Phvul.003G107900, Phvul.011G025900, Phvul.003G153800, Phvul.010G128500, Phvul.003G208600, Phvul.001G262800, Phvul.002G256400, Phvul.005G109400, Phvul.004G092600, Phvul.005G054600, Phvul.004G031200, Phvul.009G107100, Phvul.003G058400, Phvul.002G145900, Phv	Phvul.011G000600, Phvul.008G229700, Phvul.005G086200, Phvul.011G071800, CUFF.1825.1, Phvul.001G258300, Phvul.006G107500, Phvul.009G032700, Phvul.006G052700, Phvul.006G038400, Phvul.003G222900, Phvul.006G013100, CUFF.238.2, Phvul.010G034100, CUFF.5278.1, P
GO:0043228	non-membrane-bounded organelle	C	5.05845e-12	5.05845e-13	221	824	6535	12666	UNDER	Phvul.001G130000, Phvul.006G122100, Phvul.002G256400, Phvul.004G168100, Phvul.007G124000, Phvul.005G054600, Phvul.009G017300, Phvul.007G159100, Phvul.006G160500, Phvul.003G231500, Phvul.011G011500, Phvul.004G113500, Phvul.007G273700, Phvul.009G004100, Phvul.002G111200, Phvul.002G155700, Phvul.011G044300, Phvul.011G086500, Phvul.006G063600, Phvul.009G201300, Phvul.007G278700, Phvul.004G162100, Phv…	Phvul.003G094500, Phvul.007G092200, Phvul.008G229700, Phvul.006G132700, Phvul.006G052700, Phvul.002G050400, Phvul.005G090700, Phvul.011G206600, Phvul.011G172500, Phvul.006G143600, Phvul.011G126600, Phvul.003G159100, Phvul.002G266200, Phvul.004G046700, Phvul.007G207400, CUFF.2867.1, Phvul.003G154900, CUFF.6831.1, Phvul.001G200300, CUFF.992.2, Phvul.011G033300, CUFF.1320.1, Phvul.005G123700, Phvul.…
GO:0043232	intracellular non-membrane-bounded organelle	C	5.05845e-12	5.05845e-13	221	824	6535	12666	UNDER	Phvul.001G130000, Phvul.006G122100, Phvul.002G256400, Phvul.004G168100, Phvul.007G124000, Phvul.005G054600, Phvul.009G017300, Phvul.007G159100, Phvul.006G160500, Phvul.003G231500, Phvul.011G011500, Phvul.004G113500, Phvul.007G273700, Phvul.009G004100, Phvul.002G111200, Phvul.002G155700, Phvul.011G044300, Phvul.011G086500, Phvul.006G063600, Phvul.009G201300, Phvul.007G278700, Phvul.004G162100, Phv…	Phvul.003G094500, Phvul.007G092200, Phvul.008G229700, Phvul.006G132700, Phvul.006G052700, Phvul.002G050400, Phvul.005G090700, Phvul.011G206600, Phvul.011G172500, Phvul.006G143600, Phvul.011G126600, Phvul.003G159100, Phvul.002G266200, Phvul.004G046700, Phvul.007G207400, CUFF.2867.1, Phvul.003G154900, CUFF.6831.1, Phvul.001G200300, CUFF.992.2, Phvul.011G033300, CUFF.1320.1, Phvul.005G123700, Phvul.…
GO:0010467	gene expression	P	3.8079e-11	3.9983e-12	120	534	6636	12956	UNDER	Phvul.002G300600, Phvul.002G289600, Phvul.009G036100, Phvul.006G122100, Phvul.003G285400, Phvul.002G237600, Phvul.011G109300, Phvul.007G180500, Phvul.002G256400, Phvul.009G116900, Phvul.006G120200, Phvul.002G256000, Phvul.002G011200, Phvul.009G239100, Phvul.009G004500, Phvul.011G011500, Phvul.011G015700, Phvul.001G201000, Phvul.009G094100, Phvul.009G042100, Phvul.001G155700, Phvul.007G176000, Phv…	Phvul.003G025600, CUFF.3173.1, Phvul.003G094500, Phvul.004G065100, Phvul.007G092200, Phvul.008G229700, Phvul.003G105600, Phvul.008G036900, Phvul.009G032700, CUFF.3730.1, Phvul.011G079400, Phvul.002G050400, CUFF.4662.1, Phvul.011G126600, Phvul.004G174900, Phvul.008G249300, Phvul.003G159100, Phvul.002G266200, Phvul.004G046700, Phvul.002G322100, CUFF.2867.1, Phvul.005G020700, Phvul.003G219500, CUFF.…
GO:0071944	cell periphery	C	8.74141e-11	9.86864e-12	738	984	6018	12506	OVER	Phvul.001G098300, Phvul.001G134600, Phvul.010G073700, Phvul.011G046600, Phvul.007G128600, Phvul.006G208200, Phvul.010G128500, Phvul.008G019200, Phvul.011G151800, Phvul.010G117600, Phvul.007G222900, Phvul.006G220200, Phvul.003G279800, Phvul.003G080100, Phvul.007G268900, Phvul.008G285400, Phvul.008G029000, Phvul.002G210400, Phvul.008G287700, Phvul.001G250700, Phvul.003G023300, Phvul.009G123700, Phv…	Phvul.005G015000, Phvul.008G149700, Phvul.002G220200, Phvul.008G271000, Phvul.009G227800, CUFF.1366.1, CUFF.4116.1, CUFF.6526.1, Phvul.008G094900, Phvul.007G187700, Phvul.001G188100, CUFF.6877.1, Phvul.009G193700, Phvul.009G216900, Phvul.011G193200, Phvul.002G176400, Phvul.007G172200, Phvul.009G148900, Phvul.002G053900, Phvul.001G076500, Phvul.010G129600, Phvul.002G095300, Phvul.010G162400, Phvul…
GO:0003723	RNA binding	F	8.74141e-11	1.00526e-11	145	601	6611	12889	UNDER	Phvul.001G130000, Phvul.002G300600, Phvul.009G229700, Phvul.009G036100, Phvul.007G279800, Phvul.009G116900, Phvul.006G120200, Phvul.004G168100, Phvul.008G204800, Phvul.005G054600, Phvul.003G050400, Phvul.003G120600, Phvul.009G216500, Phvul.011G013800, Phvul.003G205600, Phvul.011G011500, Phvul.004G080900, Phvul.002G155700, Phvul.006G080900, Phvul.003G046700, Phvul.002G325900, Phvul.011G086500, Phv…	Phvul.005G086200, Phvul.008G036900, Phvul.010G130700, CUFF.6153.1, Phvul.011G079400, Phvul.002G050400, Phvul.009G134600, Phvul.004G077200, Phvul.006G143600, CUFF.4467.1, Phvul.008G249300, Phvul.003G159100, Phvul.004G046700, Phvul.001G191400, Phvul.002G302500, CUFF.3282.2, Phvul.009G142000, Phvul.003G049700, Phvul.007G207400, Phvul.011G181200, Phvul.001G032800, CUFF.532.2, Phvul.010G127300, Phvul.…
GO:0032991	macromolecular complex	C	7.92036e-09	1.06925e-09	133	545	6623	12945	UNDER	Phvul.001G130000, Phvul.002G300600, Phvul.002G289600, Phvul.006G122100, Phvul.003G285400, Phvul.011G109300, Phvul.002G256400, Phvul.006G120200, Phvul.004G168100, Phvul.002G203700, Phvul.008G204800, Phvul.005G054600, Phvul.001G058800, Phvul.002G256000, Phvul.002G011200, Phvul.003G205600, Phvul.011G011500, Phvul.001G201000, Phvul.009G094100, Phvul.004G080900, Phvul.009G042100, Phvul.002G155700, Phv…	Phvul.001G079900, Phvul.003G094500, Phvul.004G065100, Phvul.007G092200, Phvul.008G229700, Phvul.008G036900, Phvul.010G130700, Phvul.011G079400, Phvul.002G050400, CUFF.4662.1, Phvul.011G206600, Phvul.009G134600, Phvul.006G143600, Phvul.006G145900, Phvul.011G126600, Phvul.003G159100, Phvul.003G262000, Phvul.002G266200, Phvul.004G046700, Phvul.007G207400, CUFF.2867.1, Phvul.005G020700, Phvul.003G154…
GO:0030529	intracellular ribonucleoprotein complex	C	7.92036e-09	1.06925e-09	133	545	6623	12945	UNDER	Phvul.001G130000, Phvul.002G300600, Phvul.002G289600, Phvul.006G122100, Phvul.003G285400, Phvul.011G109300, Phvul.002G256400, Phvul.006G120200, Phvul.004G168100, Phvul.002G203700, Phvul.008G204800, Phvul.005G054600, Phvul.001G058800, Phvul.002G256000, Phvul.002G011200, Phvul.003G205600, Phvul.011G011500, Phvul.001G201000, Phvul.009G094100, Phvul.004G080900, Phvul.009G042100, Phvul.002G155700, Phv…	Phvul.001G079900, Phvul.003G094500, Phvul.004G065100, Phvul.007G092200, Phvul.008G229700, Phvul.008G036900, Phvul.010G130700, Phvul.011G079400, Phvul.002G050400, CUFF.4662.1, Phvul.011G206600, Phvul.009G134600, Phvul.006G143600, Phvul.006G145900, Phvul.011G126600, Phvul.003G159100, Phvul.003G262000, Phvul.002G266200, Phvul.004G046700, Phvul.007G207400, CUFF.2867.1, Phvul.005G020700, Phvul.003G154…
GO:0005840	ribosome	C	7.92036e-09	1.06925e-09	133	545	6623	12945	UNDER	Phvul.001G130000, Phvul.002G300600, Phvul.002G289600, Phvul.006G122100, Phvul.003G285400, Phvul.011G109300, Phvul.002G256400, Phvul.006G120200, Phvul.004G168100, Phvul.002G203700, Phvul.008G204800, Phvul.005G054600, Phvul.001G058800, Phvul.002G256000, Phvul.002G011200, Phvul.003G205600, Phvul.011G011500, Phvul.001G201000, Phvul.009G094100, Phvul.004G080900, Phvul.009G042100, Phvul.002G155700, Phv…	Phvul.001G079900, Phvul.003G094500, Phvul.004G065100, Phvul.007G092200, Phvul.008G229700, Phvul.008G036900, Phvul.010G130700, Phvul.011G079400, Phvul.002G050400, CUFF.4662.1, Phvul.011G206600, Phvul.009G134600, Phvul.006G143600, Phvul.006G145900, Phvul.011G126600, Phvul.003G159100, Phvul.003G262000, Phvul.002G266200, Phvul.004G046700, Phvul.007G207400, CUFF.2867.1, Phvul.005G020700, Phvul.003G154…
GO:1990904	ribonucleoprotein complex	C	7.92036e-09	1.06925e-09	133	545	6623	12945	UNDER	Phvul.001G130000, Phvul.002G300600, Phvul.002G289600, Phvul.006G122100, Phvul.003G285400, Phvul.011G109300, Phvul.002G256400, Phvul.006G120200, Phvul.004G168100, Phvul.002G203700, Phvul.008G204800, Phvul.005G054600, Phvul.001G058800, Phvul.002G256000, Phvul.002G011200, Phvul.003G205600, Phvul.011G011500, Phvul.001G201000, Phvul.009G094100, Phvul.004G080900, Phvul.009G042100, Phvul.002G155700, Phv…	Phvul.001G079900, Phvul.003G094500, Phvul.004G065100, Phvul.007G092200, Phvul.008G229700, Phvul.008G036900, Phvul.010G130700, Phvul.011G079400, Phvul.002G050400, CUFF.4662.1, Phvul.011G206600, Phvul.009G134600, Phvul.006G143600, Phvul.006G145900, Phvul.011G126600, Phvul.003G159100, Phvul.003G262000, Phvul.002G266200, Phvul.004G046700, Phvul.007G207400, CUFF.2867.1, Phvul.005G020700, Phvul.003G154…
GO:0005198	structural molecule activity	F	1.86871e-08	2.61619e-09	98	440	6658	13050	UNDER	Phvul.006G069700, Phvul.002G300600, Phvul.002G289600, Phvul.006G122100, Phvul.003G285400, Phvul.011G109300, Phvul.002G256400, Phvul.006G120200, Phvul.002G256000, Phvul.009G017300, Phvul.002G011200, Phvul.003G231500, Phvul.001G201000, Phvul.009G094100, Phvul.009G042100, Phvul.008G021000, Phvul.011G086500, Phvul.006G063600, Phvul.007G070800, Phvul.007G278700, Phvul.010G164300, Phvul.005G167800, Phv…	Phvul.001G079900, Phvul.003G094500, Phvul.004G065100, Phvul.007G092200, Phvul.008G229700, Phvul.008G036900, Phvul.011G079400, Phvul.002G050400, CUFF.4662.1, Phvul.011G206600, Phvul.009G134600, Phvul.007G141700, Phvul.006G145900, Phvul.011G126600, Phvul.003G159100, Phvul.002G266200, Phvul.004G046700, CUFF.2867.1, Phvul.005G020700, CUFF.1332.1, CUFF.992.2, Phvul.003G276400, CUFF.1320.1, Phvul.005G1…
GO:0044444	cytoplasmic part	C	6.53718e-08	9.47892e-09	1142	2897	5614	10593	UNDER	Phvul.011G216400, Phvul.011G025900, Phvul.002G256400, Phvul.008G055300, Phvul.005G109400, Phvul.004G168100, Phvul.004G092600, Phvul.005G054600, Phvul.004G031200, Phvul.003G058400, Phvul.008G218800, Phvul.001G021800, Phvul.009G183900, Phvul.011G011500, Phvul.008G285400, Phvul.008G029000, Phvul.002G155700, Phvul.007G262000, Phvul.006G063600, Phvul.010G074800, Phvul.010G116500, Phvul.005G074200, Phv…	Phvul.002G071100, Phvul.003G289600, Phvul.003G264300, Phvul.011G000600, Phvul.003G094500, Phvul.007G092200, Phvul.008G229700, Phvul.011G071800, Phvul.001G199000, CUFF.1825.1, Phvul.001G258300, Phvul.009G032700, CUFF.4116.1, Phvul.001G142100, Phvul.006G013
GO:0044428	nuclear part	C	7.60706e-08	1.21713e-08	69	347	6687	13143	UNDER	Phvul.009G229700, Phvul.007G193100, Phvul.009G036100, Phvul.009G013500, Phvul.001G190900, Phvul.006G208000, Phvul.001G262800, Phvul.008G019000, Phvul.007G164500, Phvul.004G166200, Phvul.009G183300, Phvul.001G207700, Phvul.009G004500, Phvul.007G273700, Phvul.008G209100, Phvul.002G155700, Phvul.011G044300, Phvul.007G040000, Phvul.001G242300, Phvul.007G255400, Phvul.006G175800, Phvul.004G001700, Phv…	CUFF.3196.1, Phvul.003G214600, CUFF.3922.1, Phvul.002G237200, CUFF.5063.1, Phvul.010G130700, Phvul.009G015000, Phvul.001G256000, Phvul.001G054600, Phvul.002G226300, Phvul.003G145500, Phvul.006G136500, Phvul.009G080900, Phvul.011G172500, Phvul.001G260500, Phvul.011G159400, Phvul.005G048600, Phvul.009G191400, Phvul.007G268100, Phvul.007G172200, CUFF.3957.1, Phvul.008G169200, Phvul.001G110400, Phvul…
GO:0044446	intracellular organelle part	C	7.60706e-08	1.21713e-08	69	347	6687	13143	UNDER	Phvul.009G229700, Phvul.007G193100, Phvul.009G036100, Phvul.009G013500, Phvul.001G190900, Phvul.006G208000, Phvul.001G262800, Phvul.008G019000, Phvul.007G164500, Phvul.004G166200, Phvul.009G183300, Phvul.001G207700, Phvul.009G004500, Phvul.007G273700, Phvul.008G209100, Phvul.002G155700, Phvul.011G044300, Phvul.007G040000, Phvul.001G242300, Phvul.007G255400, Phvul.006G175800, Phvul.004G001700, Phv…	CUFF.3196.1, Phvul.003G214600, CUFF.3922.1, Phvul.002G237200, CUFF.5063.1, Phvul.010G130700, Phvul.009G015000, Phvul.001G256000, Phvul.001G054600, Phvul.002G226300, Phvul.003G145500, Phvul.006G136500, Phvul.009G080900, Phvul.011G172500, Phvul.001G260500, Phvul.011G159400, Phvul.005G048600, Phvul.009G191400, Phvul.007G268100, Phvul.007G172200, CUFF.3957.1, Phvul.008G169200, Phvul.001G110400, Phvul…
GO:0044422	organelle part	C	7.60706e-08	1.21713e-08	69	347	6687	13143	UNDER	Phvul.009G229700, Phvul.007G193100, Phvul.009G036100, Phvul.009G013500, Phvul.001G190900, Phvul.006G208000, Phvul.001G262800, Phvul.008G019000, Phvul.007G164500, Phvul.004G166200, Phvul.009G183300, Phvul.001G207700, Phvul.009G004500, Phvul.007G273700, Phvul.008G209100, Phvul.002G155700, Phvul.011G044300, Phvul.007G040000, Phvul.001G242300, Phvul.007G255400, Phvul.006G175800, Phvul.004G001700, Phv…	CUFF.3196.1, Phvul.003G214600, CUFF.3922.1, Phvul.002G237200, CUFF.5063.1, Phvul.010G130700, Phvul.009G015000, Phvul.001G256000, Phvul.001G054600, Phvul.002G226300, Phvul.003G145500, Phvul.006G136500, Phvul.009G080900, Phvul.011G172500, Phvul.001G260500, Phvul.011G159400, Phvul.005G048600, Phvul.009G191400, Phvul.007G268100, Phvul.007G172200, CUFF.3957.1, Phvul.008G169200, Phvul.001G110400, Phvul…
GO:0043231	intracellular membrane-bounded organelle	C	1.38384e-07	2.35252e-08	1595	3862	5161	9628	UNDER	Phvul.003G107900, Phvul.011G025900, Phvul.003G208600, Phvul.001G262800, Phvul.002G256400, Phvul.005G109400, Phvul.004G092600, Phvul.005G054600, Phvul.004G031200, Phvul.003G058400, Phvul.001G021800, Phvul.008G285400, Phvul.002G155700, Phvul.003G195200, Phvul.007G262000, Phvul.003G084700, Phvul.010G116500, Phvul.010G070200, Phvul.008G236000, Phvul.005G142000, Phvul.003G062900, Phvul.007G001400, Phv…	Phvul.011G000600, Phvul.005G086200, Phvul.011G071800, CUFF.1825.1, Phvul.001G258300, Phvul.009G032700, Phvul.003G222900, Phvul.006G013100, CUFF.238.2, Phvul.010G034100, Phvul.002G035000, Phvul.001G063200, Phvul.007G220600, Phvul.008G079500, Phvul.003G2545
GO:0043227	membrane-bounded organelle	C	1.38384e-07	2.35252e-08	1595	3862	5161	9628	UNDER	Phvul.003G107900, Phvul.011G025900, Phvul.003G208600, Phvul.001G262800, Phvul.002G256400, Phvul.005G109400, Phvul.004G092600, Phvul.005G054600, Phvul.004G031200, Phvul.003G058400, Phvul.001G021800, Phvul.008G285400, Phvul.002G155700, Phvul.003G195200, Phvul.007G262000, Phvul.003G084700, Phvul.010G116500, Phvul.010G070200, Phvul.008G236000, Phvul.005G142000, Phvul.003G062900, Phvul.007G001400, Phv…	Phvul.011G000600, Phvul.005G086200, Phvul.011G071800, CUFF.1825.1, Phvul.001G258300, Phvul.009G032700, Phvul.003G222900, Phvul.006G013100, CUFF.238.2, Phvul.010G034100, Phvul.002G035000, Phvul.001G063200, Phvul.007G220600, Phvul.008G079500, Phvul.003G2545
GO:0046483	heterocycle metabolic process	P	8.23873e-07	1.56536e-07	910	2358	5846	11132	UNDER	Phvul.006G208200, Phvul.003G208600, Phvul.004G122100, Phvul.005G050000, Phvul.011G011500, Phvul.002G155700, Phvul.003G195200, Phvul.007G262000, Phvul.009G178300, Phvul.005G045900, Phvul.011G116800, Phvul.002G232200, Phvul.009G226700, Phvul.010G070200, Phvul.008G236000, Phvul.001G016200, Phvul.005G142000, Phvul.003G012400, Phvul.002G036100, Phvul.003G232700, Phvul.002G003400, Phvul.009G190200, Phv…	Phvul.003G289600, Phvul.007G176800, Phvul.003G094500, Phvul.005G086200, CUFF.5835.1, Phvul.009G032700, Phvul.008G090300, Phvul.007G036500, Phvul.009G168500, CUFF.3776.1, Phvul.003G222900, Phvul.002G165500, Phvul.010G034100, Phvul.006G143600, Phvul.009G006
GO:1901360	organic cyclic compound metabolic process	P	8.23873e-07	1.56536e-07	910	2358	5846	11132	UNDER	Phvul.006G208200, Phvul.003G208600, Phvul.004G122100, Phvul.005G050000, Phvul.011G011500, Phvul.002G155700, Phvul.003G195200, Phvul.007G262000, Phvul.009G178300, Phvul.005G045900, Phvul.011G116800, Phvul.002G232200, Phvul.009G226700, Phvul.010G070200, Phvul.008G236000, Phvul.001G016200, Phvul.005G142000, Phvul.003G012400, Phvul.002G036100, Phvul.003G232700, Phvul.002G003400, Phvul.009G190200, Phv…	Phvul.003G289600, Phvul.007G176800, Phvul.003G094500, Phvul.005G086200, CUFF.5835.1, Phvul.009G032700, Phvul.008G090300, Phvul.007G036500, Phvul.009G168500, CUFF.3776.1, Phvul.003G222900, Phvul.002G165500, Phvul.010G034100, Phvul.006G143600, Phvul.009G006
GO:0006139	nucleobase-containing compound metabolic process	P	8.23873e-07	1.56536e-07	910	2358	5846	11132	UNDER	Phvul.006G208200, Phvul.003G208600, Phvul.004G122100, Phvul.005G050000, Phvul.011G011500, Phvul.002G155700, Phvul.003G195200, Phvul.007G262000, Phvul.009G178300, Phvul.005G045900, Phvul.011G116800, Phvul.002G232200, Phvul.009G226700, Phvul.010G070200, Phvul.008G236000, Phvul.001G016200, Phvul.005G142000, Phvul.003G012400, Phvul.002G036100, Phvul.003G232700, Phvul.002G003400, Phvul.009G190200, Phv…	Phvul.003G289600, Phvul.007G176800, Phvul.003G094500, Phvul.005G086200, CUFF.5835.1, Phvul.009G032700, Phvul.008G090300, Phvul.007G036500, Phvul.009G168500, CUFF.3776.1, Phvul.003G222900, Phvul.002G165500, Phvul.010G034100, Phvul.006G143600, Phvul.009G006
GO:0006725	cellular aromatic compound metabolic process	P	8.23873e-07	1.56536e-07	910	2358	5846	11132	UNDER	Phvul.006G208200, Phvul.003G208600, Phvul.004G122100, Phvul.005G050000, Phvul.011G011500, Phvul.002G155700, Phvul.003G195200, Phvul.007G262000, Phvul.009G178300, Phvul.005G045900, Phvul.011G116800, Phvul.002G232200, Phvul.009G226700, Phvul.010G070200, Phvul.008G236000, Phvul.001G016200, Phvul.005G142000, Phvul.003G012400, Phvul.002G036100, Phvul.003G232700, Phvul.002G003400, Phvul.009G190200, Phv…	Phvul.003G289600, Phvul.007G176800, Phvul.003G094500, Phvul.005G086200, CUFF.5835.1, Phvul.009G032700, Phvul.008G090300, Phvul.007G036500, Phvul.009G168500, CUFF.3776.1, Phvul.003G222900, Phvul.002G165500, Phvul.010G034100, Phvul.006G143600, Phvul.009G006
GO:0003676	nucleic acid binding	F	1.33177e-06	2.59696e-08	853	2226	5903	11264	UNDER	Phvul.003G208600, Phvul.004G122100, Phvul.004G168100, Phvul.003G073800, Phvul.010G094400, Phvul.005G054600, Phvul.011G011500, Phvul.002G155700, Phvul.003G195200, Phvul.007G262000, Phvul.009G178300, Phvul.007G211900, Phvul.011G116800, Phvul.002G232200, Phvul.010G070200, Phvul.008G236000, Phvul.001G016200, Phvul.005G142000, Phvul.009G167400, Phvul.003G012400, Phvul.001G062100, Phvul.001G187000, Phv…	Phvul.007G176800, Phvul.005G086200, CUFF.5835.1, CUFF.2275.1, Phvul.008G090300, Phvul.003G222900, Phvul.002G165500, Phvul.010G034100, Phvul.004G011600, Phvul.003G254500, Phvul.006G143600, CUFF.4467.1, Phvul.008G249300, Phvul.003G159100, Phvul.010G080000,
GO:0016020	membrane	C	1.38495e-07	2.7699e-07	2709	4699	4047	8791	OVER	Phvul.004G021400, Phvul.008G174900, Phvul.010G073700, Phvul.006G208200, Phvul.003G153800, Phvul.007G105600, Phvul.010G128500, Phvul.003G188900, Phvul.002G256400, Phvul.011G077100, Phvul.005G109400, Phvul.001G031600, Phvul.007G147000, Phvul.004G092600, Phv	Phvul.005G015000, Phvul.011G000600, Phvul.008G229700, Phvul.004G151900, Phvul.008G275600, CUFF.1366.1, Phvul.003G038800, CUFF.5278.1, Phvul.007G220600, Phvul.007G245900, Phvul.005G008700, Phvul.008G079500, CUFF.6877.1, Phvul.003G228200, Phvul.009G119100,
GO:0006259	DNA metabolic process	P	2.53349e-06	5.32033e-07	119	473	6637	13017	UNDER	Phvul.002G113900, Phvul.009G084300, Phvul.010G157900, Phvul.003G254100, Phvul.010G161200, Phvul.007G143600, Phvul.004G122100, Phvul.006G013500, Phvul.002G209800, Phvul.002G082400, Phvul.003G195200, Phvul.010G008200, Phvul.003G119200, Phvul.009G040200, Phvul.006G064300, Phvul.005G045900, Phvul.002G001900, Phvul.003G292600, Phvul.008G196000, Phvul.003G064000, Phvul.009G100200, Phvul.007G181700, Phv…	Phvul.001G096000, Phvul.007G176800, CUFF.5835.1, Phvul.007G101000, Phvul.011G019100, Phvul.010G034100, Phvul.001G178300, Phvul.010G080000, Phvul.001G099400, CUFF.5388.1, CUFF.6745.1, Phvul.005G148900, Phvul.008G242800, Phvul.009G052300, Phvul.004G070700, Phvul.001G121400, Phvul.009G076500, Phvul.008G238300, CUFF.4478.1, Phvul.009G118000, CUFF.292.1, CUFF.2833.1, Phvul.003G000400, CUFF.5561.1, Phv…
GO:0090304	nucleic acid metabolic process	P	2.53349e-06	5.32033e-07	119	473	6637	13017	UNDER	Phvul.002G113900, Phvul.009G084300, Phvul.010G157900, Phvul.003G254100, Phvul.010G161200, Phvul.007G143600, Phvul.004G122100, Phvul.006G013500, Phvul.002G209800, Phvul.002G082400, Phvul.003G195200, Phvul.010G008200, Phvul.003G119200, Phvul.009G040200, Phvul.006G064300, Phvul.005G045900, Phvul.002G001900, Phvul.003G292600, Phvul.008G196000, Phvul.003G064000, Phvul.009G100200, Phvul.007G181700, Phv…	Phvul.001G096000, Phvul.007G176800, CUFF.5835.1, Phvul.007G101000, Phvul.011G019100, Phvul.010G034100, Phvul.001G178300, Phvul.010G080000, Phvul.001G099400, CUFF.5388.1, CUFF.6745.1, Phvul.005G148900, Phvul.008G242800, Phvul.009G052300, Phvul.004G070700, Phvul.001G121400, Phvul.009G076500, Phvul.008G238300, CUFF.4478.1, Phvul.009G118000, CUFF.292.1, CUFF.2833.1, Phvul.003G000400, CUFF.5561.1, Phv…
GO:0031974	membrane-enclosed lumen	C	2.77964e-06	6.39318e-07	61	305	6695	13185	UNDER	Phvul.009G229700, Phvul.007G193100, Phvul.009G036100, Phvul.009G013500, Phvul.001G190900, Phvul.008G019000, Phvul.007G164500, Phvul.004G166200, Phvul.009G183300, Phvul.001G207700, Phvul.009G004500, Phvul.007G273700, Phvul.008G209100, Phvul.002G155700, Phvul.011G044300, Phvul.007G040000, Phvul.007G255400, Phvul.006G175800, Phvul.004G001700, Phvul.006G104500, Phvul.006G185800, Phvul.009G077300, Phv…	CUFF.3196.1, Phvul.003G214600, CUFF.3922.1, CUFF.5063.1, Phvul.010G130700, Phvul.009G015000, Phvul.001G054600, Phvul.002G226300, Phvul.003G145500, Phvul.006G136500, Phvul.009G080900, Phvul.011G172500, Phvul.011G159400, Phvul.005G048600, Phvul.009G191400, Phvul.007G268100, CUFF.3957.1, Phvul.008G169200, Phvul.001G110400, Phvul.010G131000, Phvul.011G076800, Phvul.005G020700, CUFF.807.2, Phvul.010G0…
GO:0043233	organelle lumen	C	2.77964e-06	6.39318e-07	61	305	6695	13185	UNDER	Phvul.009G229700, Phvul.007G193100, Phvul.009G036100, Phvul.009G013500, Phvul.001G190900, Phvul.008G019000, Phvul.007G164500, Phvul.004G166200, Phvul.009G183300, Phvul.001G207700, Phvul.009G004500, Phvul.007G273700, Phvul.008G209100, Phvul.002G155700, Phvul.011G044300, Phvul.007G040000, Phvul.007G255400, Phvul.006G175800, Phvul.004G001700, Phvul.006G104500, Phvul.006G185800, Phvul.009G077300, Phv…	CUFF.3196.1, Phvul.003G214600, CUFF.3922.1, CUFF.5063.1, Phvul.010G130700, Phvul.009G015000, Phvul.001G054600, Phvul.002G226300, Phvul.003G145500, Phvul.006G136500, Phvul.009G080900, Phvul.011G172500, Phvul.011G159400, Phvul.005G048600, Phvul.009G191400, Phvul.007G268100, CUFF.3957.1, Phvul.008G169200, Phvul.001G110400, Phvul.010G131000, Phvul.011G076800, Phvul.005G020700, CUFF.807.2, Phvul.010G0…
GO:0070013	intracellular organelle lumen	C	2.77964e-06	6.39318e-07	61	305	6695	13185	UNDER	Phvul.009G229700, Phvul.007G193100, Phvul.009G036100, Phvul.009G013500, Phvul.001G190900, Phvul.008G019000, Phvul.007G164500, Phvul.004G166200, Phvul.009G183300, Phvul.001G207700, Phvul.009G004500, Phvul.007G273700, Phvul.008G209100, Phvul.002G155700, Phvul.011G044300, Phvul.007G040000, Phvul.007G255400, Phvul.006G175800, Phvul.004G001700, Phvul.006G104500, Phvul.006G185800, Phvul.009G077300, Phv…	CUFF.3196.1, Phvul.003G214600, CUFF.3922.1, CUFF.5063.1, Phvul.010G130700, Phvul.009G015000, Phvul.001G054600, Phvul.002G226300, Phvul.003G145500, Phvul.006G136500, Phvul.009G080900, Phvul.011G172500, Phvul.011G159400, Phvul.005G048600, Phvul.009G191400, Phvul.007G268100, CUFF.3957.1, Phvul.008G169200, Phvul.001G110400, Phvul.010G131000, Phvul.011G076800, Phvul.005G020700, CUFF.807.2, Phvul.010G0…
GO:0031981	nuclear lumen	C	2.77964e-06	6.39318e-07	61	305	6695	13185	UNDER	Phvul.009G229700, Phvul.007G193100, Phvul.009G036100, Phvul.009G013500, Phvul.001G190900, Phvul.008G019000, Phvul.007G164500, Phvul.004G166200, Phvul.009G183300, Phvul.001G207700, Phvul.009G004500, Phvul.007G273700, Phvul.008G209100, Phvul.002G155700, Phvul.011G044300, Phvul.007G040000, Phvul.007G255400, Phvul.006G175800, Phvul.004G001700, Phvul.006G104500, Phvul.006G185800, Phvul.009G077300, Phv…	CUFF.3196.1, Phvul.003G214600, CUFF.3922.1, CUFF.5063.1, Phvul.010G130700, Phvul.009G015000, Phvul.001G054600, Phvul.002G226300, Phvul.003G145500, Phvul.006G136500, Phvul.009G080900, Phvul.011G172500, Phvul.011G159400, Phvul.005G048600, Phvul.009G191400, Phvul.007G268100, CUFF.3957.1, Phvul.008G169200, Phvul.001G110400, Phvul.010G131000, Phvul.011G076800, Phvul.005G020700, CUFF.807.2, Phvul.010G0…
GO:0005737	cytoplasm	C	5.74146e-05	1.34924e-05	1560	3709	5196	9781	UNDER	Phvul.011G025900, Phvul.003G153800, Phvul.001G262800, Phvul.002G256400, Phvul.005G109400, Phvul.004G092600, Phvul.005G054600, Phvul.004G031200, Phvul.003G058400, Phvul.001G021800, Phvul.008G285400, Phvul.009G247400, Phvul.002G155700, Phvul.007G262000, Phvul.006G153400, Phvul.003G084700, Phvul.010G116500, Phvul.005G074200, Phvul.003G274100, Phvul.003G062900, Phvul.007G001400, Phvul.003G232700, Phv…	Phvul.011G000600, Phvul.008G229700, Phvul.011G071800, CUFF.1825.1, Phvul.001G258300, Phvul.009G032700, Phvul.006G013100, CUFF.238.2, Phvul.010G034100, CUFF.5278.1, Phvul.002G035000, Phvul.001G063200, Phvul.007G220600, Phvul.008G079500, Phvul.011G126600, P
GO:0005886	plasma membrane	C	0.000111841	2.68419e-05	581	815	6175	12675	OVER	Phvul.001G134600, Phvul.010G073700, Phvul.011G046600, Phvul.007G128600, Phvul.010G128500, Phvul.008G019200, Phvul.011G151800, Phvul.010G117600, Phvul.007G222900, Phvul.006G220200, Phvul.003G279800, Phvul.007G268900, Phvul.008G029000, Phvul.002G210400, Phvul.008G287700, Phvul.001G250700, Phvul.003G023300, Phvul.009G123700, Phvul.002G049400, Phvul.002G005700, Phvul.007G253300, Phvul.004G144000, Phv…	Phvul.008G149700, Phvul.002G220200, Phvul.008G271000, CUFF.1366.1, CUFF.4116.1, CUFF.6526.1, Phvul.008G094900, Phvul.001G188100, CUFF.6877.1, Phvul.009G193700, Phvul.009G216900, Phvul.011G193200, Phvul.002G176400, Phvul.007G172200, Phvul.002G053900, Phvul.001G076500, Phvul.002G095300, Phvul.010G162400, Phvul.005G078800, CUFF.6187.1, Phvul.004G012700, Phvul.003G140500, CUFF.5221.1, Phvul.007G04740…
GO:0003824	catalytic activity	F	0.000763806	0.000187132	3446	6240	3310	7250	OVER	Phvul.008G174900, Phvul.011G025900, Phvul.006G208200, Phvul.007G050800, Phvul.002G224800, Phvul.005G109400, Phvul.001G031600, Phvul.005G054600, Phvul.003G033100, Phvul.003G058400, Phvul.005G130000, Phvul.001G112700, Phvul.011G020200, Phvul.005G129000, Phv	Phvul.007G151500, Phvul.005G015000, Phvul.006G107500, Phvul.009G032700, CUFF.1366.1, CUFF.3523.1, Phvul.007G036500, Phvul.010G034100, Phvul.004G011600, Phvul.009G006400, Phvul.009G121400, Phvul.006G018800, Phvul.009G222100, Phvul.010G148100, Phvul.011G152
GO:0030312	external encapsulating structure	C	0.00168521	0.000429728	178	184	6578	13306	OVER	Phvul.001G098300, Phvul.004G096800, Phvul.007G088500, Phvul.008G147800, Phvul.011G107000, Phvul.006G208200, Phvul.011G004400, Phvul.003G247800, Phvul.009G053000, Phvul.003G258300, Phvul.009G019200, Phvul.006G077200, Phvul.003G080100, Phvul.005G122900, Phvul.011G117600, Phvul.001G209400, Phvul.008G285400, Phvul.008G151100, Phvul.008G082400, Phvul.009G197100, Phvul.005G174500, Phvul.008G021000, Phv…	Phvul.006G088100, Phvul.008G229300, Phvul.005G015000, Phvul.007G210400, Phvul.002G237200, Phvul.010G163900, Phvul.001G140600, Phvul.003G126700, Phvul.002G182000, Phvul.009G227800, Phvul.005G059500, Phvul.007G189600, CUFF.6115.1, Phvul.003G147400, Phvul.002G201800, Phvul.002G013500, Phvul.007G187700, Phvul.003G231900, Phvul.002G101800, Phvul.009G191400, Phvul.009G151100, Phvul.002G170300, Phvul.00…
GO:0005618	cell wall	C	0.00168521	0.000429728	178	184	6578	13306	OVER	Phvul.001G098300, Phvul.004G096800, Phvul.007G088500, Phvul.008G147800, Phvul.011G107000, Phvul.006G208200, Phvul.011G004400, Phvul.003G247800, Phvul.009G053000, Phvul.003G258300, Phvul.009G019200, Phvul.006G077200, Phvul.003G080100, Phvul.005G122900, Phvul.011G117600, Phvul.001G209400, Phvul.008G285400, Phvul.008G151100, Phvul.008G082400, Phvul.009G197100, Phvul.005G174500, Phvul.008G021000, Phv…	Phvul.006G088100, Phvul.008G229300, Phvul.005G015000, Phvul.007G210400, Phvul.002G237200, Phvul.010G163900, Phvul.001G140600, Phvul.003G126700, Phvul.002G182000, Phvul.009G227800, Phvul.005G059500, Phvul.007G189600, CUFF.6115.1, Phvul.003G147400, Phvul.002G201800, Phvul.002G013500, Phvul.007G187700, Phvul.003G231900, Phvul.002G101800, Phvul.009G191400, Phvul.009G151100, Phvul.002G170300, Phvul.00…
GO:0016772	transferase activity, transferring phosphorus-containing groups	F	0.00181948	4.82163e-05	695	1033	6061	12457	OVER	Phvul.008G174900, Phvul.011G216400, Phvul.001G134600, Phvul.011G186900, Phvul.007G050800, Phvul.009G260500, Phvul.008G019200, Phvul.011G151800, Phvul.010G117600, Phvul.001G165100, Phvul.002G017700, Phvul.011G180000, Phvul.005G166200, Phvul.008G159500, Phvul.007G241300, Phvul.011G042000, Phvul.005G178300, Phvul.002G002200, Phvul.006G174100, Phvul.011G069600, Phvul.002G049400, Phvul.007G253300, Phv…	Phvul.003G289600, Phvul.011G182300, Phvul.002G220200, Phvul.008G030000, Phvul.009G038000, Phvul.003G038800, CUFF.5726.1, Phvul.001G188100, CUFF.193.2, CUFF.6877.1, Phvul.004G111200, Phvul.004G136500, Phvul.011G193200, Phvul.004G068500, Phvul.011G070700, Phvul.007G051900, Phvul.006G106400, CUFF.5036.1, Phvul.001G204900, Phvul.005G078800, CUFF.6187.1, Phvul.002G278200, Phvul.003G059500, Phvul.009G2…
GO:0016301	kinase activity	F	0.00181948	4.82163e-05	695	1033	6061	12457	OVER	Phvul.008G174900, Phvul.011G216400, Phvul.001G134600, Phvul.011G186900, Phvul.007G050800, Phvul.009G260500, Phvul.008G019200, Phvul.011G151800, Phvul.010G117600, Phvul.001G165100, Phvul.002G017700, Phvul.011G180000, Phvul.005G166200, Phvul.008G159500, Phvul.007G241300, Phvul.011G042000, Phvul.005G178300, Phvul.002G002200, Phvul.006G174100, Phvul.011G069600, Phvul.002G049400, Phvul.007G253300, Phv…	Phvul.003G289600, Phvul.011G182300, Phvul.002G220200, Phvul.008G030000, Phvul.009G038000, Phvul.003G038800, CUFF.5726.1, Phvul.001G188100, CUFF.193.2, CUFF.6877.1, Phvul.004G111200, Phvul.004G136500, Phvul.011G193200, Phvul.004G068500, Phvul.011G070700, Phvul.007G051900, Phvul.006G106400, CUFF.5036.1, Phvul.001G204900, Phvul.005G078800, CUFF.6187.1, Phvul.002G278200, Phvul.003G059500, Phvul.009G2…
GO:0005730	nucleolus	C	0.00510565	0.00137853	31	178	6725	13312	UNDER	Phvul.003G096500, Phvul.003G235600, Phvul.003G201700, Phvul.004G166200, Phvul.002G279500, Phvul.011G206900, Phvul.001G207700, Phvul.009G159600, Phvul.003G080200, Phvul.007G178000, Phvul.007G273700, Phvul.008G209100, Phvul.004G138700, Phvul.011G044300, Phvul.007G040000, Phvul.002G193600, Phvul.007G255400, Phvul.008G232300, Phvul.008G102300, Phvul.006G104500, Phvul.003G123400, Phvul.006G203800, Phv…	Phvul.007G126700, Phvul.003G214600, CUFF.3922.1, CUFF.5063.1, Phvul.008G101000, Phvul.007G264700, Phvul.009G015000, Phvul.011G201300, Phvul.003G145500, Phvul.006G136500, Phvul.009G080900, Phvul.011G172500, CUFF.1675.1, CUFF.4448.1, Phvul.011G164600, Phvul.011G159400, Phvul.005G048600, Phvul.009G191400, Phvul.009G247000, Phvul.002G172200, Phvul.007G080500, Phvul.007G268100, Phvul.008G169200, Phvul…
GO:0005576	extracellular region	C	0.000821683	0.00225963	219	251	6537	13239	OVER	Phvul.001G098300, Phvul.009G252200, Phvul.006G208200, Phvul.001G218400, Phvul.006G075700, Phvul.006G077200, Phvul.006G011600, Phvul.002G058000, Phvul.008G199400, Phvul.009G210800, Phvul.008G150800, Phvul.006G207100, Phvul.003G213400, Phvul.011G024800, Phvul.005G154900, Phvul.003G236500, Phvul.008G232200, Phvul.005G076500, Phvul.001G143300, Phvul.004G051600, Phvul.002G311100, Phvul.011G041600, Phv…	Phvul.006G197100, Phvul.005G015000, CUFF.5100.1, Phvul.007G235300, Phvul.009G227800, Phvul.005G059500, Phvul.002G201800, Phvul.007G187700, Phvul.010G115300, Phvul.003G273700, Phvul.011G134100, Phvul.002G170300, Phvul.001G003700, Phvul.001G217200, Phvul.011G127000, Phvul.004G087000, CUFF.532.2, Phvul.009G222100, Phvul.009G127500, Phvul.003G055700, CUFF.3535.1, Phvul.005G072700, Phvul.007G076500, P…
GO:0009536	plastid	C	0.0202812	0.00567872	334	948	6422	12542	UNDER	Phvul.002G180100, Phvul.008G231100, Phvul.003G235300, Phvul.010G165800, Phvul.002G256400, Phvul.005G109400, Phvul.007G227800, Phvul.004G092600, Phvul.007G279000, Phvul.004G128200, Phvul.005G054600, Phvul.009G025600, Phvul.007G075300, Phvul.003G201400, Phvul.002G275600, Phvul.008G285400, Phvul.010G008600, Phvul.009G197500, Phvul.009G082400, Phvul.006G170300, Phvul.011G086500, Phvul.007G278700, Phv…	Phvul.010G048500, Phvul.011G000600, Phvul.007G092200, Phvul.011G071800, CUFF.1825.1, Phvul.001G258300, CUFF.87.2, Phvul.009G032700, CUFF.3730.1, CUFF.2068.1, Phvul.007G096800, Phvul.002G050400, CUFF.238.2, Phvul.010G034100, Phvul.009G157600, Phvul.007G000300, Phvul.008G249300, CUFF.3414.1, Phvul.003G113100, Phvul.002G266200, Phvul.005G065500, Phvul.007G172200, Phvul.009G062100, Phvul.004G068500, …
GO:0004518	nuclease activity	F	0.251753	0.0730084	36	177	6720	13313	UNDER	Phvul.009G036100, Phvul.007G231200, Phvul.011G109000, Phvul.004G122100, Phvul.008G182500, Phvul.002G279500, Phvul.004G019700, Phvul.008G183100, Phvul.009G159600, Phvul.001G012000, Phvul.002G084500, Phvul.002G170800, Phvul.001G138100, Phvul.011G103500, Phvul.002G084600, Phvul.005G170100, Phvul.002G308800, Phvul.011G097400, Phvul.007G261800, Phvul.002G001900, Phvul.008G232300, Phvul.008G152600, Phv…	Phvul.007G092600, Phvul.009G231500, CUFF.5063.1, Phvul.007G088100, Phvul.010G004400, Phvul.007G105200, CUFF.4432.1, Phvul.001G128600, CUFF.6153.1, Phvul.001G147400, Phvul.010G034100, Phvul.008G111600, Phvul.004G117300, Phvul.002G228200, Phvul.004G077200, Phvul.007G243600, Phvul.008G111200, Phvul.008G245500, Phvul.007G249300, Phvul.002G191800, CUFF.4968.1, Phvul.002G178700, Phvul.008G234500, Phvul…
GO:0016788	hydrolase activity, acting on ester bonds	F	0.251753	0.0730084	36	177	6720	13313	UNDER	Phvul.009G036100, Phvul.007G231200, Phvul.011G109000, Phvul.004G122100, Phvul.008G182500, Phvul.002G279500, Phvul.004G019700, Phvul.008G183100, Phvul.009G159600, Phvul.001G012000, Phvul.002G084500, Phvul.002G170800, Phvul.001G138100, Phvul.011G103500, Phvul.002G084600, Phvul.005G170100, Phvul.002G308800, Phvul.011G097400, Phvul.007G261800, Phvul.002G001900, Phvul.008G232300, Phvul.008G152600, Phv…	Phvul.007G092600, Phvul.009G231500, CUFF.5063.1, Phvul.007G088100, Phvul.010G004400, Phvul.007G105200, CUFF.4432.1, Phvul.001G128600, CUFF.6153.1, Phvul.001G147400, Phvul.010G034100, Phvul.008G111600, Phvul.004G117300, Phvul.002G228200, Phvul.004G077200, Phvul.007G243600, Phvul.008G111200, Phvul.008G245500, Phvul.007G249300, Phvul.002G191800, CUFF.4968.1, Phvul.002G178700, Phvul.008G234500, Phvul…
GO:0005739	mitochondrion	C	0.75667	0.223218	176	540	6580	12950	UNDER	Phvul.007G174500, Phvul.009G013500, Phvul.010G153300, Phvul.011G109300, Phvul.002G256400, Phvul.009G116900, Phvul.011G015300, Phvul.004G168100, Phvul.003G279400, Phvul.008G202900, Phvul.007G222900, Phvul.004G128200, Phvul.003G168500, Phvul.008G218800, Phvul.003G205600, Phvul.002G275600, Phvul.008G271400, Phvul.011G011500, Phvul.011G015700, Phvul.001G201000, Phvul.008G285400, Phvul.001G174100, Phv…	Phvul.002G071100, Phvul.001G079900, Phvul.010G048500, Phvul.001G033900, Phvul.003G069300, Phvul.001G199000, Phvul.003G105600, Phvul.009G032700, CUFF.4662.1, Phvul.011G206600, CUFF.2539.1, CUFF.1900.2, Phvul.006G145900, Phvul.002G199400, Phvul.008G249300, Phvul.003G159100, Phvul.009G191400, Phvul.002G029800, Phvul.L001300, Phvul.009G142000, Phvul.002G322100, Phvul.003G024500, CUFF.2407.1, Phvul.00…
GO:0044237	cellular metabolic process	P	0.788956	0.236687	1831	4128	4925	9362	UNDER	Phvul.008G174900, Phvul.006G208200, Phvul.003G153800, Phvul.003G208600, Phvul.002G256400, Phvul.004G122100, Phvul.005G109400, Phvul.004G092600, Phvul.006G084300, Phvul.002G155700, Phvul.003G195200, Phvul.007G262000, Phvul.011G042000, Phvul.009G178300, Phv	Phvul.007G176800, Phvul.008G229700, Phvul.005G086200, Phvul.009G032700, Phvul.009G038000, CUFF.1366.1, Phvul.007G036500, CUFF.3776.1, Phvul.003G222900, Phvul.010G034100, Phvul.003G038800, Phvul.001G063200, Phvul.011G126600, CUFF.6877.1, Phvul.009G006400,
GO:0016740	transferase activity	F	5.40451	1.64838	1508	2620	5248	10870	OVER	Phvul.001G098300, Phvul.008G174900, Phvul.011G216400, Phvul.011G025900, Phvul.011G186900, Phvul.007G050800, Phvul.011G122000, Phvul.008G019200, Phvul.003G188900, Phvul.011G151800, Phvul.010G117600, Phvul.001G182800, Phvul.005G166200, Phvul.003G275200, Phvul.008G159500, Phvul.003G058400, Phvul.002G145900, Phvul.001G021800, Phvul.009G183900, Phvul.007G241300, Phvul.010G143900, Phvul.006G117300, Phv…	Phvul.003G289600, Phvul.006G212700, Phvul.011G182300, CUFF.4828.1, CUFF.1825.1, Phvul.011G136400, CUFF.6779.1, Phvul.009G038000, CUFF.1366.1, Phvul.003G163600, CUFF.3523.1, Phvul.010G034100, Phvul.003G038800, CUFF.193.2, Phvul.005G119200, CUFF.6877.1, Phv
GO:0005654	nucleoplasm	C	0.882908	2.73701	34	155	6722	13335	UNDER	Phvul.009G229700, Phvul.007G193100, Phvul.009G036100, Phvul.009G013500, Phvul.001G190900, Phvul.001G224500, Phvul.008G130700, Phvul.008G019000, Phvul.007G164500, Phvul.004G166200, Phvul.004G145400, Phvul.009G183300, Phvul.011G206900, Phvul.009G004500, Phvul.001G224300, Phvul.002G155700, Phvul.002G191500, Phvul.002G193600, Phvul.007G043700, Phvul.006G175800, Phvul.009G228100, Phvul.004G001700, Phv…	CUFF.3196.1, CUFF.3922.1, CUFF.2851.1, Phvul.008G101000, Phvul.010G130700, Phvul.001G056500, Phvul.009G168900, CUFF.3192.1, Phvul.001G054600, Phvul.002G226300, CUFF.4448.1, Phvul.002G304400, Phvul.010G044300, Phvul.005G040600, CUFF.3957.1, Phvul.003G104000, Phvul.001G156000, Phvul.002G104500, Phvul.010G099000, CUFF.3995.1, Phvul.002G227900, Phvul.004G074500, Phvul.011G114900, CUFF.2221.1, Phvul.0…
GO:0044464	cell part	C	1.15353	3.63362	2995	6445	3761	7045	UNDER	Phvul.001G098300, Phvul.010G073700, Phvul.003G107900, Phvul.011G025900, Phvul.006G208200, Phvul.003G153800, Phvul.010G128500, Phvul.003G208600, Phvul.001G262800, Phvul.002G256400, Phvul.005G109400, Phvul.004G092600, Phvul.005G054600, Phvul.004G031200, Phv	Phvul.005G015000, Phvul.011G000600, Phvul.008G229700, Phvul.006G107500, Phvul.009G032700, CUFF.1366.1, Phvul.003G222900, Phvul.010G034100, CUFF.5278.1, Phvul.001G063200, Phvul.008G079500, Phvul.011G126600, Phvul.009G006400, Phvul.003G159100, CUFF.6032.1,
GO:0005634	nucleus	C	2.23058	7.13786	763	1823	5993	11667	UNDER	Phvul.003G107900, Phvul.005G136900, Phvul.010G000200, Phvul.011G186900, Phvul.003G208600, Phvul.001G262800, Phvul.010G117600, Phvul.010G092100, Phvul.006G105200, Phvul.005G050000, Phvul.006G162000, Phvul.010G056000, Phvul.005G166200, Phvul.003G073800, Phvul.010G094400, Phvul.006G186200, Phvul.009G181600, Phvul.003G252200, Phvul.008G283100, Phvul.003G176800, Phvul.002G155700, Phvul.003G195200, Phv…	Phvul.002G071100, Phvul.003G264300, Phvul.005G086200, CUFF.5835.1, Phvul.003G222900, Phvul.002G165500, Phvul.001G063200, Phvul.003G254500, Phvul.011G172500, Phvul.006G143600, Phvul.009G006400, Phvul.007G082400, Phvul.006G048200, Phvul.001G157600, CUFF.3282.2, Phvul.011G047700, Phvul.003G068200, Phvul.009G020700, Phvul.010G125000, Phvul.009G052300, Phvul.001G053400, Phvul.005G018500, Phvul.002G278…
GO:0044699	single-organism process	P	3.50066	11.3772	1081	1845	5675	11645	OVER	Phvul.004G021400, Phvul.011G186900, Phvul.008G019200, Phvul.003G188900, Phvul.011G151800, Phvul.010G117600, Phvul.001G201400, Phvul.010G094400, Phvul.010G058300, Phvul.010G063900, Phvul.008G029000, Phvul.001G247400, Phvul.006G153400, Phvul.002G025200, Phvul.007G210800, Phvul.007G253300, Phvul.011G020200, Phvul.010G116500, Phvul.005G074200, Phvul.007G102100, Phvul.009G226700, Phvul.007G010100, Phv…	Phvul.008G191000, CUFF.5835.1, CUFF.1825.1, Phvul.006G107500, Phvul.009G032700, CUFF.4116.1, Phvul.006G038400, Phvul.001G142100, Phvul.001G063200, Phvul.009G237600, CUFF.6877.1, CUFF.4214.1, CUFF.1584.1, Phvul.006G018800, Phvul.007G257900, Phvul.003G068200, Phvul.009G020700, Phvul.011G148400, Phvul.010G125000, Phvul.002G278200, Phvul.005G031500, Phvul.003G140500, Phvul.001G171900, Phvul.007G24020…
GO:0005623	cell	C	56.1901	18.5427	3087	6594	3669	6896	UNDER	Phvul.010G073700, Phvul.003G107900, Phvul.011G025900, Phvul.006G208200, Phvul.003G153800, Phvul.010G128500, Phvul.003G208600, Phvul.002G256400, Phvul.005G109400, Phvul.005G054600, Phvul.004G031200, Phvul.009G107100, Phvul.003G279800, Phvul.003G058400, Phv	Phvul.005G015000, Phvul.011G000600, Phvul.008G229700, Phvul.006G107500, Phvul.009G032700, CUFF.1366.1, Phvul.003G222900, Phvul.010G034100, CUFF.5278.1, Phvul.001G063200, Phvul.008G079500, Phvul.011G126600, Phvul.009G006400, Phvul.003G159100, CUFF.6032.1,
GO:0006464	cellular protein modification process	P	96.3825	33.252	819	1374	5937	12116	OVER	Phvul.008G174900, Phvul.011G216400, Phvul.003G153800, Phvul.011G186900, Phvul.008G019200, Phvul.011G151800, Phvul.010G117600, Phvul.004G092600, Phvul.008G159500, Phvul.009G183900, Phvul.007G241300, Phvul.003G233800, Phvul.011G042000, Phvul.002G049400, Phvul.007G253300, Phvul.005G074200, Phvul.004G169200, Phvul.006G185000, Phvul.007G267700, Phvul.007G001400, Phvul.005G110400, Phvul.002G229000, Phv…	CUFF.5583.2, Phvul.011G182300, Phvul.003G103300, Phvul.009G248500, Phvul.002G220200, Phvul.008G030000, Phvul.009G038000, CUFF.1366.1, Phvul.003G163600, CUFF.4892.1, CUFF.6526.1, Phvul.003G038800, Phvul.001G063200, Phvul.001G188100, CUFF.698.1, Phvul.005G119200, CUFF.6877.1, Phvul.009G006400, Phvul.006G088900, Phvul.002G235700, Phvul.007G082400, Phvul.004G136500, Phvul.005G029400, Phvul.011G193200…
GO:0036211	protein modification process	P	96.3825	33.252	819	1374	5937	12116	OVER	Phvul.008G174900, Phvul.011G216400, Phvul.003G153800, Phvul.011G186900, Phvul.008G019200, Phvul.011G151800, Phvul.010G117600, Phvul.004G092600, Phvul.008G159500, Phvul.009G183900, Phvul.007G241300, Phvul.003G233800, Phvul.011G042000, Phvul.002G049400, Phvul.007G253300, Phvul.005G074200, Phvul.004G169200, Phvul.006G185000, Phvul.007G267700, Phvul.007G001400, Phvul.005G110400, Phvul.002G229000, Phv…	CUFF.5583.2, Phvul.011G182300, Phvul.003G103300, Phvul.009G248500, Phvul.002G220200, Phvul.008G030000, Phvul.009G038000, CUFF.1366.1, Phvul.003G163600, CUFF.4892.1, CUFF.6526.1, Phvul.003G038800, Phvul.001G063200, Phvul.001G188100, CUFF.698.1, Phvul.005G119200, CUFF.6877.1, Phvul.009G006400, Phvul.006G088900, Phvul.002G235700, Phvul.007G082400, Phvul.004G136500, Phvul.005G029400, Phvul.011G193200…
GO:0043412	macromolecule modification	P	96.3825	33.252	819	1374	5937	12116	OVER	Phvul.008G174900, Phvul.011G216400, Phvul.003G153800, Phvul.011G186900, Phvul.008G019200, Phvul.011G151800, Phvul.010G117600, Phvul.004G092600, Phvul.008G159500, Phvul.009G183900, Phvul.007G241300, Phvul.003G233800, Phvul.011G042000, Phvul.002G049400, Phvul.007G253300, Phvul.005G074200, Phvul.004G169200, Phvul.006G185000, Phvul.007G267700, Phvul.007G001400, Phvul.005G110400, Phvul.002G229000, Phv…	CUFF.5583.2, Phvul.011G182300, Phvul.003G103300, Phvul.009G248500, Phvul.002G220200, Phvul.008G030000, Phvul.009G038000, CUFF.1366.1, Phvul.003G163600, CUFF.4892.1, CUFF.6526.1, Phvul.003G038800, Phvul.001G063200, Phvul.001G188100, CUFF.698.1, Phvul.005G119200, CUFF.6877.1, Phvul.009G006400, Phvul.006G088900, Phvul.002G235700, Phvul.007G082400, Phvul.004G136500, Phvul.005G029400, Phvul.011G193200…
GO:0004872	receptor activity	F	156.743	55.6439	48	40	6708	13450	OVER	Phvul.009G252300, Phvul.008G036200, Phvul.011G216400, Phvul.003G285500, Phvul.008G285800, Phvul.003G270900, Phvul.011G153600, Phvul.003G109700, Phvul.007G153800, Phvul.001G165500, Phvul.007G168600, Phvul.007G273300, Phvul.010G165200, Phvul.008G292200, Phvul.007G206800, Phvul.007G271700, Phvul.008G220600, Phvul.002G063900, Phvul.002G117500, Phvul.002G224200, Phvul.004G086300, Phvul.008G000600, Phv…	Phvul.002G046300, Phvul.008G206700, Phvul.008G122200, Phvul.006G208100, Phvul.009G153900, Phvul.009G252400, Phvul.003G270600, CUFF.5438.1, CUFF.4891.1, CUFF.4892.1, Phvul.003G015500, Phvul.002G052600, Phvul.007G166200, Phvul.002G063700, Phvul.009G239400, CUFF.1903.1, Phvul.001G063200, Phvul.011G119200, CUFF.1906.1, Phvul.005G138900, Phvul.007G086800, CUFF.4214.1, Phvul.001G210200, Phvul.008G17370…
GO:0060089	molecular transducer activity	F	156.743	55.6439	48	40	6708	13450	OVER	Phvul.009G252300, Phvul.008G036200, Phvul.011G216400, Phvul.003G285500, Phvul.008G285800, Phvul.003G270900, Phvul.011G153600, Phvul.003G109700, Phvul.007G153800, Phvul.001G165500, Phvul.007G168600, Phvul.007G273300, Phvul.010G165200, Phvul.008G292200, Phvul.007G206800, Phvul.007G271700, Phvul.008G220600, Phvul.002G063900, Phvul.002G117500, Phvul.002G224200, Phvul.004G086300, Phvul.008G000600, Phv…	Phvul.002G046300, Phvul.008G206700, Phvul.008G122200, Phvul.006G208100, Phvul.009G153900, Phvul.009G252400, Phvul.003G270600, CUFF.5438.1, CUFF.4891.1, CUFF.4892.1, Phvul.003G015500, Phvul.002G052600, Phvul.007G166200, Phvul.002G063700, Phvul.009G239400, CUFF.1903.1, Phvul.001G063200, Phvul.011G119200, CUFF.1906.1, Phvul.005G138900, Phvul.007G086800, CUFF.4214.1, Phvul.001G210200, Phvul.008G17370…
GO:0019748	secondary metabolic process	P	184.527	66.4299	139	176	6617	13314	OVER	Phvul.004G021400, Phvul.008G277500, Phvul.010G013000, Phvul.001G145500, Phvul.006G054200, Phvul.001G124400, Phvul.005G054200, Phvul.010G063500, Phvul.008G032700, Phvul.001G120600, Phvul.010G063900, Phvul.008G247400, Phvul.009G029000, Phvul.002G025200, Phvul.004G159500, Phvul.007G257500, Phvul.003G213400, Phvul.010G022400, Phvul.005G039100, Phvul.002G294800, Phvul.011G020200, Phvul.005G183600, Phv…	CUFF.359.1, Phvul.003G153000, Phvul.002G025600, Phvul.001G216100, Phvul.004G159900, Phvul.004G021800, Phvul.007G086200, Phvul.010G077100, Phvul.011G092500, CUFF.1343.1, Phvul.003G147000, Phvul.002G094500, Phvul.001G122100, Phvul.006G054600, Phvul.001G145100, Phvul.008G107100, Phvul.006G079100, Phvul.002G080100, Phvul.001G145900, Phvul.010G115300, Phvul.002G268500, Phvul.004G119200, Phvul.010G0767…
GO:0006950	response to stress	P	401.751	147.377	483	778	6273	12712	OVER	Phvul.009G088500, Phvul.003G107900, Phvul.002G293700, Phvul.007G153800, Phvul.006G075700, Phvul.010G161200, Phvul.011G151800, Phvul.006G162000, Phvul.007G222900, Phvul.006G200600, Phvul.004G036900, Phvul.007G268900, Phvul.008G285400, Phvul.002G209400, Phvul.003G195200, Phvul.007G210800, Phvul.006G207100, Phvul.002G049400, Phvul.005G045900, Phvul.005G039100, Phvul.004G066200, Phvul.001G143300, Phv…	Phvul.001G132300, CUFF.5835.1, Phvul.002G220200, Phvul.007G101000, CUFF.1366.1, Phvul.007G187700, CUFF.698.1, Phvul.009G237600, CUFF.6877.1, Phvul.009G006400, Phvul.011G193200, Phvul.001G099400, Phvul.006G133800, CUFF.2821.2, Phvul.006G110900, Phvul.004G009500, Phvul.001G121400, Phvul.009G076500, Phvul.005G031500, Phvul.003G140500, CUFF.4478.1, CUFF.5169.2, Phvul.008G194500, Phvul.003G000400, Phv…
GO:0005829	cytosol	C	401.751	14.8648	272	705	6484	12785	UNDER	Phvul.007G281200, Phvul.001G266600, Phvul.009G200200, Phvul.003G126300, Phvul.007G222900, Phvul.002G109000, Phvul.006G094900, Phvul.006G220200, Phvul.004G143600, Phvul.002G249300, Phvul.001G252200, Phvul.008G243200, Phvul.002G304000, Phvul.011G011500, Phvul.006G151100, Phvul.011G210300, Phvul.002G213100, Phvul.003G213400, Phvul.002G288800, Phvul.007G091000, Phvul.008G259900, Phvul.009G140500, Phv…	Phvul.003G025600, Phvul.002G107500, Phvul.003G289600, Phvul.003G264300, Phvul.003G094500, Phvul.009G086200, Phvul.003G105600, CUFF.1825.1, Phvul.008G036900, CUFF.3730.1, Phvul.011G079400, Phvul.002G050400, Phvul.001G054600, Phvul.008G046700, Phvul.004G111200, CUFF.6624.1, Phvul.008G249300, Phvul.003G159100, Phvul.005G065500, Phvul.007G084700, Phvul.008G193300, Phvul.004G046700, CUFF.4565.2, Phvul…
GO:0005975	carbohydrate metabolic process	P	470.811	17.6554	396	624	6360	12866	OVER	Phvul.001G098300, Phvul.003G241300, Phvul.006G208200, Phvul.006G109800, Phvul.003G188900, Phvul.007G222900, Phvul.006G050400, Phvul.010G058300, Phvul.003G035400, Phvul.001G021800, Phvul.007G218400, Phvul.001G112700, Phvul.008G171400, Phvul.005G039100, Phvul.003G207400, Phvul.005G076500, Phvul.009G226700, Phvul.003G127500, Phvul.007G010100, Phvul.002G311100, Phvul.007G001400, Phvul.005G131200, Phv…	Phvul.001G109400, CUFF.2580.1, Phvul.003G289600, Phvul.005G015000, CUFF.5353.1, Phvul.008G271000, Phvul.003G184300, CUFF.2045.1, Phvul.009G168500, Phvul.004G079500, Phvul.008G023700, Phvul.001G239900, Phvul.004G111200, Phvul.001G209000, Phvul.006G122900, CUFF.2177.1, Phvul.010G082300, CUFF.1004.1, Phvul.003G290700, Phvul.009G148900, Phvul.004G022500, Phvul.004G018000, CUFF.4565.2, Phvul.001G21110…
GO:0044710	single-organism metabolic process	P	515.012	195.704	416	660	6340	12830	OVER	Phvul.004G021400, Phvul.009G200200, Phvul.003G188900, Phvul.006G050400, Phvul.001G145500, Phvul.009G113900, Phvul.010G063900, Phvul.002G153400, Phvul.002G025200, Phvul.004G159500, Phvul.005G039100, Phvul.002G294800, Phvul.011G020200, Phvul.004G089300, Phvul.005G135800, Phvul.011G022500, Phvul.007G102100, Phvul.009G226700, Phvul.007G010100, Phvul.003G114200, Phvul.006G144800, Phvul.003G206400, Phv…	CUFF.359.1, Phvul.008G191000, Phvul.003G243600, Phvul.006G130400, Phvul.011G161600, CUFF.1825.1, Phvul.011G092500, Phvul.003G184300, CUFF.1343.1, Phvul.003G147000, CUFF.6756.1, Phvul.003G239100, Phvul.001G142100, Phvul.009G199000, Phvul.010G115300, Phvul.007G117700, Phvul.001G222100, Phvul.005G101800, Phvul.006G122900, Phvul.002G268500, Phvul.007G205100, Phvul.006G018800, Phvul.004G018000, Phvul.…
GO:0050896	response to stimulus	P	55.9085	215.248	818	1399	5938	12091	OVER	Phvul.009G088500, Phvul.011G216400, Phvul.003G107900, Phvul.011G186900, Phvul.011G151800, Phvul.010G117600, Phvul.001G201400, Phvul.004G092600, Phvul.005G166200, Phvul.003G279800, Phvul.004G036900, Phvul.008G285400, Phvul.002G209400, Phvul.003G195200, Phvul.007G210800, Phvul.006G207100, Phvul.002G049400, Phvul.005G045900, Phvul.007G253300, Phvul.010G116500, Phvul.005G074200, Phvul.008G217700, Phv…	Phvul.001G132300, CUFF.5835.1, Phvul.002G220200, Phvul.006G107500, Phvul.007G101000, CUFF.1366.1, CUFF.4116.1, CUFF.4892.1, Phvul.006G038400, Phvul.003G222900, Phvul.002G165500, Phvul.007G187700, Phvul.008G160500, Phvul.001G063200, Phvul.001G188100, CUFF.698.1, Phvul.009G237600, Phvul.011G036800, CUFF.6877.1, CUFF.4214.1, Phvul.009G006400, CUFF.1584.1, Phvul.011G193200, Phvul.001G099400, Phvul.00…
GO:0044260	cellular macromolecule metabolic process	P	1531.62	597.332	1030	2312	5726	11178	UNDER	Phvul.008G174900, Phvul.011G216400, Phvul.003G153800, Phvul.011G186900, Phvul.008G019200, Phvul.002G256400, Phvul.011G151800, Phvul.010G117600, Phvul.004G122100, Phvul.004G092600, Phvul.008G159500, Phvul.009G183900, Phvul.011G011500, Phvul.007G241300, Phvul.003G195200, Phvul.003G233800, Phvul.011G042000, Phvul.006G063600, Phvul.002G049400, Phvul.005G045900, Phvul.007G253300, Phvul.005G074200, Phv…	Phvul.007G176800, Phvul.011G182300, Phvul.003G094500, Phvul.007G092200, Phvul.008G229700, CUFF.5835.1, Phvul.009G032700, Phvul.009G038000, CUFF.1366.1, Phvul.003G163600, CUFF.6526.1, Phvul.010G034100, Phvul.003G038800, Phvul.001G063200, Phvul.011G126600,
GO:0016043	cellular component organization	P	307.704	1230.82	476	1126	6280	12364	UNDER	Phvul.001G098300, Phvul.001G159900, Phvul.003G153800, Phvul.004G168100, Phvul.008G218800, Phvul.008G029000, Phvul.009G247400, Phvul.002G300200, Phvul.004G170300, Phvul.009G040200, Phvul.008G171400, Phvul.006G207100, Phvul.002G324400, Phvul.011G020200, Phvul.008G236000, Phvul.003G274100, Phvul.005G016200, Phvul.005G142000, Phvul.002G060100, Phvul.002G311100, Phvul.006G144800, Phvul.002G213900, Phv…	Phvul.005G015000, Phvul.003G264300, Phvul.006G042900, CUFF.5835.1, Phvul.006G132700, CUFF.6526.1, Phvul.002G050400, Phvul.007G082400, CUFF.3414.1, Phvul.009G148900, Phvul.007G207400, CUFF.6141.1, Phvul.009G062100, Phvul.001G026000, Phvul.009G020700, Phvul.009G222100, Phvul.010G125000, Phvul.009G052300, Phvul.007G037600, Phvul.004G012700, Phvul.003G059500, CUFF.3064.1, CUFF.4478.1, CUFF.1320.1, Ph…
GO:0071840	cellular component organization or biogenesis	P	307.704	1230.82	476	1126	6280	12364	UNDER	Phvul.001G098300, Phvul.001G159900, Phvul.003G153800, Phvul.004G168100, Phvul.008G218800, Phvul.008G029000, Phvul.009G247400, Phvul.002G300200, Phvul.004G170300, Phvul.009G040200, Phvul.008G171400, Phvul.006G207100, Phvul.002G324400, Phvul.011G020200, Phvul.008G236000, Phvul.003G274100, Phvul.005G016200, Phvul.005G142000, Phvul.002G060100, Phvul.002G311100, Phvul.006G144800, Phvul.002G213900, Phv…	Phvul.005G015000, Phvul.003G264300, Phvul.006G042900, CUFF.5835.1, Phvul.006G132700, CUFF.6526.1, Phvul.002G050400, Phvul.007G082400, CUFF.3414.1, Phvul.009G148900, Phvul.007G207400, CUFF.6141.1, Phvul.009G062100, Phvul.001G026000, Phvul.009G020700, Phvul.009G222100, Phvul.010G125000, Phvul.009G052300, Phvul.007G037600, Phvul.004G012700, Phvul.003G059500, CUFF.3064.1, CUFF.4478.1, CUFF.1320.1, Ph…
GO:0043170	macromolecule metabolic process	P	3846.98	1558.03	1250	2749	5506	10741	UNDER	Phvul.008G174900, Phvul.009G088500, Phvul.011G216400, Phvul.003G153800, Phvul.010G163500, Phvul.011G186900, Phvul.008G019200, Phvul.002G256400, Phvul.011G151800, Phvul.010G117600, Phvul.004G122100, Phvul.002G224800, Phvul.004G092600, Phvul.008G159500, Phvul.009G183900, Phvul.011G011500, Phvul.007G241300, Phvul.003G195200, Phvul.003G233800, Phvul.011G042000, Phvul.006G063600, Phvul.002G049400, Phv…	Phvul.002G071100, Phvul.003G264300, Phvul.007G176800, Phvul.011G182300, Phvul.003G094500, Phvul.007G092200, Phvul.008G229700, CUFF.5835.1, Phvul.001G258300, Phvul.009G032700, Phvul.009G038000, CUFF.1366.1, Phvul.003G163600, CUFF.6526.1, Phvul.010G034100,
GO:0065007	biological regulation	P	4194.37	171.969	396	649	6360	12841	OVER	Phvul.007G153800, Phvul.005G136900, Phvul.011G186900, Phvul.010G117600, Phvul.001G201400, Phvul.006G220200, Phvul.005G027100, Phvul.001G247400, Phvul.006G153400, Phvul.005G178300, Phvul.010G022000, Phvul.007G253300, Phvul.010G116500, Phvul.005G074200, Phvul.005G076500, Phvul.002G314600, Phvul.005G142000, Phvul.002G142500, Phvul.003G139600, Phvul.003G196300, Phvul.001G246300, Phvul.007G137300, Phv…	CUFF.2580.1, Phvul.011G048900, Phvul.008G088100, Phvul.010G130700, Phvul.001G235300, Phvul.006G107500, CUFF.4116.1, CUFF.4892.1, Phvul.002G038400, Phvul.006G038400, Phvul.008G160500, Phvul.001G063200, Phvul.001G188100, Phvul.007G079100, Phvul.009G237600, Phvul.011G036800, CUFF.1584.1, Phvul.007G107900, Phvul.005G101800, Phvul.010G086900, Phvul.003G068200, Phvul.011G070700, CUFF.2821.2, Phvul.008G…
GO:0001071	nucleic acid binding transcription factor activity	F	7132.91	3010.56	245	384	6511	13106	OVER	Phvul.010G000200, Phvul.003G208600, Phvul.006G186200, Phvul.003G252200, Phvul.008G283100, Phvul.008G117300, Phvul.009G065500, Phvul.007G067800, Phvul.004G027500, Phvul.011G116800, Phvul.001G160100, Phvul.002G196800, Phvul.010G146600, Phvul.008G131500, Phvul.011G142300, Phvul.003G232700, Phvul.007G131200, Phvul.001G156400, Phvul.009G190200, Phvul.007G176900, Phvul.005G124100, Phvul.002G019100, Phv…	CUFF.1053.1, CUFF.2602.1, Phvul.003G182800, CUFF.626.1, Phvul.002G094100, Phvul.009G254500, Phvul.001G101000, Phvul.008G090300, Phvul.010G052200, Phvul.001G073800, Phvul.002G165500, Phvul.003G017300, Phvul.007G090700, CUFF.4165.2, Phvul.009G130000, Phvul.011G119500, Phvul.001G231500, Phvul.010G124700, Phvul.009G075300, Phvul.008G247800, Phvul.009G069300, CUFF.4949.1, Phvul.002G029000, Phvul.007G1…
GO:0003700	transcription factor activity, sequence-specific DNA binding	F	7132.91	3010.56	245	384	6511	13106	OVER	Phvul.010G000200, Phvul.003G208600, Phvul.006G186200, Phvul.003G252200, Phvul.008G283100, Phvul.008G117300, Phvul.009G065500, Phvul.007G067800, Phvul.004G027500, Phvul.011G116800, Phvul.001G160100, Phvul.002G196800, Phvul.010G146600, Phvul.008G131500, Phvul.011G142300, Phvul.003G232700, Phvul.007G131200, Phvul.001G156400, Phvul.009G190200, Phvul.007G176900, Phvul.005G124100, Phvul.002G019100, Phv…	CUFF.1053.1, CUFF.2602.1, Phvul.003G182800, CUFF.626.1, Phvul.002G094100, Phvul.009G254500, Phvul.001G101000, Phvul.008G090300, Phvul.010G052200, Phvul.001G073800, Phvul.002G165500, Phvul.003G017300, Phvul.007G090700, CUFF.4165.2, Phvul.009G130000, Phvul.011G119500, Phvul.001G231500, Phvul.010G124700, Phvul.009G075300, Phvul.008G247800, Phvul.009G069300, CUFF.4949.1, Phvul.002G029000, Phvul.007G1…
GO:0065008	regulation of biological quality	P	7132.91	3102.82	116	161	6640	13329	OVER	Phvul.007G088500, Phvul.010G159400, Phvul.007G153800, Phvul.005G182400, Phvul.001G165500, Phvul.009G030000, Phvul.001G169300, Phvul.002G205200, Phvul.001G247400, Phvul.005G170300, Phvul.008G044000, Phvul.006G153400, Phvul.001G179100, Phvul.003G219900, Phvul.L008200, Phvul.002G068100, Phvul.001G091000, Phvul.001G143700, Phvul.003G034700, Phvul.002G314600, Phvul.008G221800, Phvul.008G219600, Phvul.…	CUFF.2580.1, Phvul.007G038000, Phvul.002G113500, Phvul.007G227400, Phvul.005G067000, Phvul.004G161300, Phvul.004G052700, Phvul.001G203300, Phvul.003G273300, Phvul.008G080900, Phvul.001G250300, CUFF.3033.1, Phvul.001G090300, Phvul.007G079100, Phvul.001G197100, Phvul.003G201000, CUFF.6289.1, Phvul.005G025600, Phvul.010G086900, Phvul.011G061200, Phvul.007G155300, Phvul.006G171000, CUFF.4021.1, CUFF.…
GO:0042592	homeostatic process	P	7132.91	3102.82	116	161	6640	13329	OVER	Phvul.007G088500, Phvul.010G159400, Phvul.007G153800, Phvul.005G182400, Phvul.001G165500, Phvul.009G030000, Phvul.001G169300, Phvul.002G205200, Phvul.001G247400, Phvul.005G170300, Phvul.008G044000, Phvul.006G153400, Phvul.001G179100, Phvul.003G219900, Phvul.L008200, Phvul.002G068100, Phvul.001G091000, Phvul.001G143700, Phvul.003G034700, Phvul.002G314600, Phvul.008G221800, Phvul.008G219600, Phvul.…	CUFF.2580.1, Phvul.007G038000, Phvul.002G113500, Phvul.007G227400, Phvul.005G067000, Phvul.004G161300, Phvul.004G052700, Phvul.001G203300, Phvul.003G273300, Phvul.008G080900, Phvul.001G250300, CUFF.3033.1, Phvul.001G090300, Phvul.007G079100, Phvul.001G197100, Phvul.003G201000, CUFF.6289.1, Phvul.005G025600, Phvul.010G086900, Phvul.011G061200, Phvul.007G155300, Phvul.006G171000, CUFF.4021.1, CUFF.…
GO:0019725	cellular homeostasis	P	7132.91	3102.82	116	161	6640	13329	OVER	Phvul.007G088500, Phvul.010G159400, Phvul.007G153800, Phvul.005G182400, Phvul.001G165500, Phvul.009G030000, Phvul.001G169300, Phvul.002G205200, Phvul.001G247400, Phvul.005G170300, Phvul.008G044000, Phvul.006G153400, Phvul.001G179100, Phvul.003G219900, Phvul.L008200, Phvul.002G068100, Phvul.001G091000, Phvul.001G143700, Phvul.003G034700, Phvul.002G314600, Phvul.008G221800, Phvul.008G219600, Phvul.…	CUFF.2580.1, Phvul.007G038000, Phvul.002G113500, Phvul.007G227400, Phvul.005G067000, Phvul.004G161300, Phvul.004G052700, Phvul.001G203300, Phvul.003G273300, Phvul.008G080900, Phvul.001G250300, CUFF.3033.1, Phvul.001G090300, Phvul.007G079100, Phvul.001G197100, Phvul.003G201000, CUFF.6289.1, Phvul.005G025600, Phvul.010G086900, Phvul.011G061200, Phvul.007G155300, Phvul.006G171000, CUFF.4021.1, CUFF.…

## Sheet: Myc-Ctrl vs. Myc+Ctrl
GO-ID	Term	Category	FDR	P-Value	#Test	#Ref	#notAnnotTest	#notAnnotRef	Over/Under	TestSeqs	RefSeqs
GO:0005615	extracellular space	C	0.0603034	0.000544681	14	32	726	19474	OVER	Phvul.003G155400, Phvul.011G131400, Phvul.011G127000, Phvul.011G132100, Phvul.011G133200, Phvul.011G132000, Phvul.011G131200, Phvul.011G133300, Phvul.011G132800, Phvul.011G130800, Phvul.011G130900, Phvul.011G134000, Phvul.011G134100, Phvul.011G126700	Phvul.009G013600, Phvul.009G227100, Phvul.002G239300, Phvul.003G130600, Phvul.009G013000, Phvul.008G273000, Phvul.011G132900, CUFF.580.1, Phvul.011G008700, Phvul.009G067300, Phvul.009G008200, Phvul.009G008100, Phvul.006G176500, Phvul.006G048700, Phvul.005G080600, Phvul.011G133600, Phvul.009G062300, Phvul.003G240800, Phvul.011G127100, Phvul.011G127300, Phvul.011G127400, Phvul.011G131700, Phvul.005…
GO:0005764	lysosome	C	0.0603034	0.000904552	13	27	727	19479	OVER	Phvul.011G131400, Phvul.011G127000, Phvul.011G132100, Phvul.011G133200, Phvul.011G132000, Phvul.011G131200, Phvul.011G133300, Phvul.011G132800, Phvul.011G130800, Phvul.011G130900, Phvul.011G134000, Phvul.011G134100, Phvul.011G126700	Phvul.009G013600, Phvul.009G227100, Phvul.002G239300, Phvul.003G130600, Phvul.009G013000, Phvul.007G071800, Phvul.011G132900, CUFF.580.1, Phvul.002G056200, Phvul.009G067300, Phvul.009G008200, Phvul.009G008100, Phvul.011G133600, Phvul.010G099500, Phvul.003G240800, Phvul.011G127100, Phvul.011G127300, Phvul.011G127400, Phvul.011G131700, Phvul.007G099600, Phvul.008G001700, Phvul.011G041600, Phvul.002…
GO:0000323	lytic vacuole	C	0.0603034	0.000904552	13	27	727	19479	OVER	Phvul.011G131400, Phvul.011G127000, Phvul.011G132100, Phvul.011G133200, Phvul.011G132000, Phvul.011G131200, Phvul.011G133300, Phvul.011G132800, Phvul.011G130800, Phvul.011G130900, Phvul.011G134000, Phvul.011G134100, Phvul.011G126700	Phvul.009G013600, Phvul.009G227100, Phvul.002G239300, Phvul.003G130600, Phvul.009G013000, Phvul.007G071800, Phvul.011G132900, CUFF.580.1, Phvul.002G056200, Phvul.009G067300, Phvul.009G008200, Phvul.009G008100, Phvul.011G133600, Phvul.010G099500, Phvul.003G240800, Phvul.011G127100, Phvul.011G127300, Phvul.011G127400, Phvul.011G131700, Phvul.007G099600, Phvul.008G001700, Phvul.011G041600, Phvul.002…
GO:0044421	extracellular region part	C	0.0692438	0.00138488	14	35	726	19471	OVER	Phvul.003G155400, Phvul.011G131400, Phvul.011G127000, Phvul.011G132100, Phvul.011G133200, Phvul.011G132000, Phvul.011G131200, Phvul.011G133300, Phvul.011G132800, Phvul.011G130800, Phvul.011G130900, Phvul.011G134000, Phvul.011G134100, Phvul.011G126700	Phvul.009G013600, Phvul.009G227100, Phvul.002G239300, Phvul.006G208200, Phvul.003G130600, Phvul.009G013000, Phvul.008G273000, Phvul.011G132900, CUFF.580.1, Phvul.011G008700, Phvul.009G067300, Phvul.009G008200, Phvul.009G008100, Phvul.006G176500, Phvul.006G048700, Phvul.005G080600, Phvul.011G133600, Phvul.009G062300, Phvul.003G240800, Phvul.011G127100, Phvul.011G127300, Phvul.011G127400, Phvul.003…
GO:0006807	nitrogen compound metabolic process	P	0.474237	0.00142271	81	3658	659	15848	UNDER	Phvul.009G229700, Phvul.001G111800, Phvul.006G122100, Phvul.003G111800, Phvul.002G264300, Phvul.010G159400, Phvul.005G101400, Phvul.010G092300, Phvul.003G208600, Phvul.009G078300, Phvul.005G111800, Phvul.007G222900, Phvul.002G275000, Phvul.005G080300, Phvul.003G143800, Phvul.005G032900, Phvul.011G176900, Phvul.011G101500, Phvul.007G176000, Phvul.007G193300, Phvul.009G065500, Phvul.002G155300, Phv…	Phvul.007G176800, Phvul.008G229700, Phvul.006G208200, Phvul.005G086200, Phvul.002G256400, Phvul.009G032700, Phvul.007G036500, CUFF.3776.1, Phvul.003G222900, Phvul.010G034100, Phvul.011G126600, Phvul.009G006400, Phvul.008G249300, Phvul.003G159100, Phvul.00
GO:0034641	cellular nitrogen compound metabolic process	P	0.474237	0.00142271	81	3658	659	15848	UNDER	Phvul.009G229700, Phvul.001G111800, Phvul.006G122100, Phvul.003G111800, Phvul.002G264300, Phvul.010G159400, Phvul.005G101400, Phvul.010G092300, Phvul.003G208600, Phvul.009G078300, Phvul.005G111800, Phvul.007G222900, Phvul.002G275000, Phvul.005G080300, Phvul.003G143800, Phvul.005G032900, Phvul.011G176900, Phvul.011G101500, Phvul.007G176000, Phvul.007G193300, Phvul.009G065500, Phvul.002G155300, Phv…	Phvul.007G176800, Phvul.008G229700, Phvul.006G208200, Phvul.005G086200, Phvul.002G256400, Phvul.009G032700, Phvul.007G036500, CUFF.3776.1, Phvul.003G222900, Phvul.010G034100, Phvul.011G126600, Phvul.009G006400, Phvul.008G249300, Phvul.003G159100, Phvul.00
GO:0005576	extracellular region	C	1.58804	0.0555812	43	427	697	19079	OVER	Phvul.001G098300, Phvul.003G155400, Phvul.003G264400, Phvul.011G132100, Phvul.002G069300, Phvul.011G132000, Phvul.009G233200, Phvul.006G075600, Phvul.006G126200, Phvul.011G132800, Phvul.005G071400, Phvul.011G130800, Phvul.011G130900, Phvul.001G092900, Phvul.007G187700, Phvul.005G122900, Phvul.006G011600, Phvul.008G249900, Phvul.011G134000, Phvul.011G069900, Phvul.003G228000, Phvul.008G249500, Phv…	Phvul.006G197100, Phvul.005G015000, CUFF.5100.1, Phvul.006G208200, Phvul.006G075700, Phvul.009G227800, Phvul.002G201800, Phvul.010G115300, Phvul.002G058000, Phvul.008G150800, Phvul.006G207100, Phvul.004G087000, Phvul.011G024800, CUFF.532.2, Phvul.009G222100, Phvul.005G076500, Phvul.001G143300, CUFF.3535.1, Phvul.002G311100, Phvul.001G215700, Phvul.001G098200, Phvul.009G225400, Phvul.010G073800, P…
GO:0044237	cellular metabolic process	P	29.3475	0.011739	160	5799	580	13707	UNDER	Phvul.006G151500, Phvul.009G229700, Phvul.006G122100, Phvul.002G264300, Phvul.007G017700, Phvul.010G159400, Phvul.005G101400, Phvul.003G208600, Phvul.009G078300, Phvul.007G222900, Phvul.010G092500, Phvul.008G002200, Phvul.004G147800, Phvul.009G239500, Phvul.008G222100, Phvul.001G029000, Phvul.009G239900, Phvul.007G176000, Phvul.007G193300, Phvul.009G065500, Phvul.010G065400, Phvul.004G136100, Phv…	Phvul.008G174900, Phvul.007G176800, Phvul.008G229700, Phvul.006G208200, Phvul.005G086200, Phvul.003G153800, Phvul.002G256400, Phvul.009G032700, Phvul.009G038000, Phvul.005G109400, CUFF.1366.1, Phvul.007G036500, CUFF.3776.1, Phvul.003G222900, Phvul.010G034
GO:0043228	non-membrane-bounded organelle	C	34.1805	1.74306	13	1032	727	18474	UNDER	Phvul.003G234100, Phvul.006G122100, Phvul.006G043900, Phvul.009G188500, Phvul.002G148300, Phvul.002G120200, Phvul.002G151700, Phvul.001G210500, Phvul.002G329800, Phvul.005G139100, Phvul.004G028400, Phvul.004G138300, Phvul.006G080600	Phvul.003G094500, Phvul.007G092200, Phvul.008G229700, Phvul.006G132700, Phvul.002G256400, Phvul.006G052700, Phvul.004G168100, Phvul.002G050400, Phvul.005G090700, Phvul.005G054600, Phvul.011G206600, Phvul.009G017300, Phvul.011G172500, Phvul.006G143600, Phvul.011G011500, Phvul.011G126600, Phvul.003G159100, Phvul.002G155700, Phvul.002G266200, Phvul.004G046700, Phvul.006G063600, Phvul.007G207400, CUF…
GO:0043232	intracellular non-membrane-bounded organelle	C	34.1805	1.74306	13	1032	727	18474	UNDER	Phvul.003G234100, Phvul.006G122100, Phvul.006G043900, Phvul.009G188500, Phvul.002G148300, Phvul.002G120200, Phvul.002G151700, Phvul.001G210500, Phvul.002G329800, Phvul.005G139100, Phvul.004G028400, Phvul.004G138300, Phvul.006G080600	Phvul.003G094500, Phvul.007G092200, Phvul.008G229700, Phvul.006G132700, Phvul.002G256400, Phvul.006G052700, Phvul.004G168100, Phvul.002G050400, Phvul.005G090700, Phvul.005G054600, Phvul.011G206600, Phvul.009G017300, Phvul.011G172500, Phvul.006G143600, Phvul.011G011500, Phvul.011G126600, Phvul.003G159100, Phvul.002G155700, Phvul.002G266200, Phvul.004G046700, Phvul.006G063600, Phvul.007G207400, CUF…
GO:0010467	gene expression	P	34.1805	3.69214	5	649	735	18857	UNDER	Phvul.006G122100, Phvul.007G176000, Phvul.002G148300, Phvul.004G028400, Phvul.006G080600	Phvul.003G025600, CUFF.3173.1, Phvul.003G094500, Phvul.004G065100, Phvul.007G092200, Phvul.008G229700, Phvul.003G105600, Phvul.008G036900, Phvul.002G256400, Phvul.009G032700, CUFF.3730.1, Phvul.011G079400, Phvul.002G050400, CUFF.4662.1, Phvul.011G011500, Phvul.011G126600, Phvul.004G174900, Phvul.008G249300, Phvul.003G159100, Phvul.002G266200, Phvul.004G046700, Phvul.006G063600, Phvul.002G322100, …
GO:0044271	cellular nitrogen compound biosynthetic process	P	34.1805	4.09437	4	598	736	18908	UNDER	Phvul.006G122100, Phvul.002G148300, Phvul.004G028400, Phvul.006G080600	Phvul.003G025600, CUFF.3173.1, Phvul.003G094500, Phvul.004G065100, Phvul.007G092200, Phvul.008G229700, Phvul.003G105600, Phvul.008G036900, Phvul.002G256400, Phvul.009G032700, CUFF.3730.1, Phvul.011G079400, Phvul.002G050400, CUFF.4662.1, Phvul.011G011500, Phvul.011G126600, Phvul.004G174900, Phvul.008G249300, Phvul.003G159100, Phvul.002G266200, Phvul.004G046700, Phvul.006G063600, Phvul.002G322100, …
GO:0043603	cellular amide metabolic process	P	34.1805	4.09437	4	598	736	18908	UNDER	Phvul.006G122100, Phvul.002G148300, Phvul.004G028400, Phvul.006G080600	Phvul.003G025600, CUFF.3173.1, Phvul.003G094500, Phvul.004G065100, Phvul.007G092200, Phvul.008G229700, Phvul.003G105600, Phvul.008G036900, Phvul.002G256400, Phvul.009G032700, CUFF.3730.1, Phvul.011G079400, Phvul.002G050400, CUFF.4662.1, Phvul.011G011500, Phvul.011G126600, Phvul.004G174900, Phvul.008G249300, Phvul.003G159100, Phvul.002G266200, Phvul.004G046700, Phvul.006G063600, Phvul.002G322100, …
GO:0044249	cellular biosynthetic process	P	34.1805	4.09437	4	598	736	18908	UNDER	Phvul.006G122100, Phvul.002G148300, Phvul.004G028400, Phvul.006G080600	Phvul.003G025600, CUFF.3173.1, Phvul.003G094500, Phvul.004G065100, Phvul.007G092200, Phvul.008G229700, Phvul.003G105600, Phvul.008G036900, Phvul.002G256400, Phvul.009G032700, CUFF.3730.1, Phvul.011G079400, Phvul.002G050400, CUFF.4662.1, Phvul.011G011500, Phvul.011G126600, Phvul.004G174900, Phvul.008G249300, Phvul.003G159100, Phvul.002G266200, Phvul.004G046700, Phvul.006G063600, Phvul.002G322100, …
GO:1901576	organic substance biosynthetic process	P	34.1805	4.09437	4	598	736	18908	UNDER	Phvul.006G122100, Phvul.002G148300, Phvul.004G028400, Phvul.006G080600	Phvul.003G025600, CUFF.3173.1, Phvul.003G094500, Phvul.004G065100, Phvul.007G092200, Phvul.008G229700, Phvul.003G105600, Phvul.008G036900, Phvul.002G256400, Phvul.009G032700, CUFF.3730.1, Phvul.011G079400, Phvul.002G050400, CUFF.4662.1, Phvul.011G011500, Phvul.011G126600, Phvul.004G174900, Phvul.008G249300, Phvul.003G159100, Phvul.002G266200, Phvul.004G046700, Phvul.006G063600, Phvul.002G322100, …
GO:0006518	peptide metabolic process	P	34.1805	4.09437	4	598	736	18908	UNDER	Phvul.006G122100, Phvul.002G148300, Phvul.004G028400, Phvul.006G080600	Phvul.003G025600, CUFF.3173.1, Phvul.003G094500, Phvul.004G065100, Phvul.007G092200, Phvul.008G229700, Phvul.003G105600, Phvul.008G036900, Phvul.002G256400, Phvul.009G032700, CUFF.3730.1, Phvul.011G079400, Phvul.002G050400, CUFF.4662.1, Phvul.011G011500, Phvul.011G126600, Phvul.004G174900, Phvul.008G249300, Phvul.003G159100, Phvul.002G266200, Phvul.004G046700, Phvul.006G063600, Phvul.002G322100, …
GO:1901566	organonitrogen compound biosynthetic process	P	34.1805	4.09437	4	598	736	18908	UNDER	Phvul.006G122100, Phvul.002G148300, Phvul.004G028400, Phvul.006G080600	Phvul.003G025600, CUFF.3173.1, Phvul.003G094500, Phvul.004G065100, Phvul.007G092200, Phvul.008G229700, Phvul.003G105600, Phvul.008G036900, Phvul.002G256400, Phvul.009G032700, CUFF.3730.1, Phvul.011G079400, Phvul.002G050400, CUFF.4662.1, Phvul.011G011500, Phvul.011G126600, Phvul.004G174900, Phvul.008G249300, Phvul.003G159100, Phvul.002G266200, Phvul.004G046700, Phvul.006G063600, Phvul.002G322100, …
GO:0043043	peptide biosynthetic process	P	34.1805	4.09437	4	598	736	18908	UNDER	Phvul.006G122100, Phvul.002G148300, Phvul.004G028400, Phvul.006G080600	Phvul.003G025600, CUFF.3173.1, Phvul.003G094500, Phvul.004G065100, Phvul.007G092200, Phvul.008G229700, Phvul.003G105600, Phvul.008G036900, Phvul.002G256400, Phvul.009G032700, CUFF.3730.1, Phvul.011G079400, Phvul.002G050400, CUFF.4662.1, Phvul.011G011500, Phvul.011G126600, Phvul.004G174900, Phvul.008G249300, Phvul.003G159100, Phvul.002G266200, Phvul.004G046700, Phvul.006G063600, Phvul.002G322100, …
GO:0034645	cellular macromolecule biosynthetic process	P	34.1805	4.09437	4	598	736	18908	UNDER	Phvul.006G122100, Phvul.002G148300, Phvul.004G028400, Phvul.006G080600	Phvul.003G025600, CUFF.3173.1, Phvul.003G094500, Phvul.004G065100, Phvul.007G092200, Phvul.008G229700, Phvul.003G105600, Phvul.008G036900, Phvul.002G256400, Phvul.009G032700, CUFF.3730.1, Phvul.011G079400, Phvul.002G050400, CUFF.4662.1, Phvul.011G011500, Phvul.011G126600, Phvul.004G174900, Phvul.008G249300, Phvul.003G159100, Phvul.002G266200, Phvul.004G046700, Phvul.006G063600, Phvul.002G322100, …
GO:0009059	macromolecule biosynthetic process	P	34.1805	4.09437	4	598	736	18908	UNDER	Phvul.006G122100, Phvul.002G148300, Phvul.004G028400, Phvul.006G080600	Phvul.003G025600, CUFF.3173.1, Phvul.003G094500, Phvul.004G065100, Phvul.007G092200, Phvul.008G229700, Phvul.003G105600, Phvul.008G036900, Phvul.002G256400, Phvul.009G032700, CUFF.3730.1, Phvul.011G079400, Phvul.002G050400, CUFF.4662.1, Phvul.011G011500, Phvul.011G126600, Phvul.004G174900, Phvul.008G249300, Phvul.003G159100, Phvul.002G266200, Phvul.004G046700, Phvul.006G063600, Phvul.002G322100, …
GO:0043604	amide biosynthetic process	P	34.1805	4.09437	4	598	736	18908	UNDER	Phvul.006G122100, Phvul.002G148300, Phvul.004G028400, Phvul.006G080600	Phvul.003G025600, CUFF.3173.1, Phvul.003G094500, Phvul.004G065100, Phvul.007G092200, Phvul.008G229700, Phvul.003G105600, Phvul.008G036900, Phvul.002G256400, Phvul.009G032700, CUFF.3730.1, Phvul.011G079400, Phvul.002G050400, CUFF.4662.1, Phvul.011G011500, Phvul.011G126600, Phvul.004G174900, Phvul.008G249300, Phvul.003G159100, Phvul.002G266200, Phvul.004G046700, Phvul.006G063600, Phvul.002G322100, …
GO:1901564	organonitrogen compound metabolic process	P	34.1805	4.09437	4	598	736	18908	UNDER	Phvul.006G122100, Phvul.002G148300, Phvul.004G028400, Phvul.006G080600	Phvul.003G025600, CUFF.3173.1, Phvul.003G094500, Phvul.004G065100, Phvul.007G092200, Phvul.008G229700, Phvul.003G105600, Phvul.008G036900, Phvul.002G256400, Phvul.009G032700, CUFF.3730.1, Phvul.011G079400, Phvul.002G050400, CUFF.4662.1, Phvul.011G011500, Phvul.011G126600, Phvul.004G174900, Phvul.008G249300, Phvul.003G159100, Phvul.002G266200, Phvul.004G046700, Phvul.006G063600, Phvul.002G322100, …
GO:0006412	translation	P	34.1805	4.09437	4	598	736	18908	UNDER	Phvul.006G122100, Phvul.002G148300, Phvul.004G028400, Phvul.006G080600	Phvul.003G025600, CUFF.3173.1, Phvul.003G094500, Phvul.004G065100, Phvul.007G092200, Phvul.008G229700, Phvul.003G105600, Phvul.008G036900, Phvul.002G256400, Phvul.009G032700, CUFF.3730.1, Phvul.011G079400, Phvul.002G050400, CUFF.4662.1, Phvul.011G011500, Phvul.011G126600, Phvul.004G174900, Phvul.008G249300, Phvul.003G159100, Phvul.002G266200, Phvul.004G046700, Phvul.006G063600, Phvul.002G322100, …
GO:0044428	nuclear part	C	34.1805	4.44347	1	415	739	19091	UNDER	Phvul.009G229700	CUFF.3196.1, Phvul.010G130700, Phvul.001G262800, Phvul.009G015000, Phvul.001G256000, Phvul.001G054600, Phvul.009G080900, Phvul.011G172500, Phvul.001G260500, Phvul.002G155700, Phvul.011G159400, Phvul.009G191400, Phvul.011G044300, Phvul.007G172200, Phvul.008G169200, Phvul.001G110400, Phvul.009G100600, Phvul.005G020700, CUFF.807.2, CUFF.6831.1, CUFF.3995.1, Phvul.009G261600, Phvul.001G200300, Phvul.…
GO:0044446	intracellular organelle part	C	34.1805	4.44347	1	415	739	19091	UNDER	Phvul.009G229700	CUFF.3196.1, Phvul.010G130700, Phvul.001G262800, Phvul.009G015000, Phvul.001G256000, Phvul.001G054600, Phvul.009G080900, Phvul.011G172500, Phvul.001G260500, Phvul.002G155700, Phvul.011G159400, Phvul.009G191400, Phvul.011G044300, Phvul.007G172200, Phvul.008G169200, Phvul.001G110400, Phvul.009G100600, Phvul.005G020700, CUFF.807.2, CUFF.6831.1, CUFF.3995.1, Phvul.009G261600, Phvul.001G200300, Phvul.…
GO:0044422	organelle part	C	34.1805	4.44347	1	415	739	19091	UNDER	Phvul.009G229700	CUFF.3196.1, Phvul.010G130700, Phvul.001G262800, Phvul.009G015000, Phvul.001G256000, Phvul.001G054600, Phvul.009G080900, Phvul.011G172500, Phvul.001G260500, Phvul.002G155700, Phvul.011G159400, Phvul.009G191400, Phvul.011G044300, Phvul.007G172200, Phvul.008G169200, Phvul.001G110400, Phvul.009G100600, Phvul.005G020700, CUFF.807.2, CUFF.6831.1, CUFF.3995.1, Phvul.009G261600, Phvul.001G200300, Phvul.…
GO:0003723	RNA binding	F	4.09619	5.52986	7	739	733	18767	UNDER	Phvul.011G013700, Phvul.009G229700, Phvul.010G110200, Phvul.006G043900, Phvul.002G084600, Phvul.004G028400, Phvul.009G167400	Phvul.001G130000, Phvul.007G279800, Phvul.005G086200, Phvul.008G036900, Phvul.010G130700, Phvul.004G168100, CUFF.6153.1, Phvul.011G079400, Phvul.002G050400, Phvul.005G054600, Phvul.009G134600, Phvul.011G013800, Phvul.004G077200, Phvul.006G143600, CUFF.4467.1, Phvul.011G011500, Phvul.008G249300, Phvul.003G159100, Phvul.002G155700, Phvul.004G046700, Phvul.001G191400, Phvul.002G302500, CUFF.3282.2, …
GO:0046483	heterocycle metabolic process	P	44.9503	6.9673	77	3191	663	16315	UNDER	Phvul.009G229700, Phvul.001G111800, Phvul.003G111800, Phvul.002G264300, Phvul.010G159400, Phvul.005G101400, Phvul.010G092300, Phvul.003G208600, Phvul.009G078300, Phvul.005G111800, Phvul.007G222900, Phvul.002G275000, Phvul.005G080300, Phvul.003G143800, Phvul.005G032900, Phvul.011G176900, Phvul.011G101500, Phvul.007G176000, Phvul.007G193300, Phvul.009G065500, Phvul.002G155300, Phvul.001G135600, Phv…	Phvul.007G176800, Phvul.006G208200, Phvul.005G086200, Phvul.009G032700, Phvul.007G036500, CUFF.3776.1, Phvul.003G222900, Phvul.010G034100, Phvul.009G006400, Phvul.008G249300, Phvul.002G155700, Phvul.009G178300, Phvul.010G080000, Phvul.001G157600, CUFF.603
GO:1901360	organic cyclic compound metabolic process	P	44.9503	6.9673	77	3191	663	16315	UNDER	Phvul.009G229700, Phvul.001G111800, Phvul.003G111800, Phvul.002G264300, Phvul.010G159400, Phvul.005G101400, Phvul.010G092300, Phvul.003G208600, Phvul.009G078300, Phvul.005G111800, Phvul.007G222900, Phvul.002G275000, Phvul.005G080300, Phvul.003G143800, Phvul.005G032900, Phvul.011G176900, Phvul.011G101500, Phvul.007G176000, Phvul.007G193300, Phvul.009G065500, Phvul.002G155300, Phvul.001G135600, Phv…	Phvul.007G176800, Phvul.006G208200, Phvul.005G086200, Phvul.009G032700, Phvul.007G036500, CUFF.3776.1, Phvul.003G222900, Phvul.010G034100, Phvul.009G006400, Phvul.008G249300, Phvul.002G155700, Phvul.009G178300, Phvul.010G080000, Phvul.001G157600, CUFF.603
GO:0006139	nucleobase-containing compound metabolic process	P	44.9503	6.9673	77	3191	663	16315	UNDER	Phvul.009G229700, Phvul.001G111800, Phvul.003G111800, Phvul.002G264300, Phvul.010G159400, Phvul.005G101400, Phvul.010G092300, Phvul.003G208600, Phvul.009G078300, Phvul.005G111800, Phvul.007G222900, Phvul.002G275000, Phvul.005G080300, Phvul.003G143800, Phvul.005G032900, Phvul.011G176900, Phvul.011G101500, Phvul.007G176000, Phvul.007G193300, Phvul.009G065500, Phvul.002G155300, Phvul.001G135600, Phv…	Phvul.007G176800, Phvul.006G208200, Phvul.005G086200, Phvul.009G032700, Phvul.007G036500, CUFF.3776.1, Phvul.003G222900, Phvul.010G034100, Phvul.009G006400, Phvul.008G249300, Phvul.002G155700, Phvul.009G178300, Phvul.010G080000, Phvul.001G157600, CUFF.603
GO:0006725	cellular aromatic compound metabolic process	P	44.9503	6.9673	77	3191	663	16315	UNDER	Phvul.009G229700, Phvul.001G111800, Phvul.003G111800, Phvul.002G264300, Phvul.010G159400, Phvul.005G101400, Phvul.010G092300, Phvul.003G208600, Phvul.009G078300, Phvul.005G111800, Phvul.007G222900, Phvul.002G275000, Phvul.005G080300, Phvul.003G143800, Phvul.005G032900, Phvul.011G176900, Phvul.011G101500, Phvul.007G176000, Phvul.007G193300, Phvul.009G065500, Phvul.002G155300, Phvul.001G135600, Phv…	Phvul.007G176800, Phvul.006G208200, Phvul.005G086200, Phvul.009G032700, Phvul.007G036500, CUFF.3776.1, Phvul.003G222900, Phvul.010G034100, Phvul.009G006400, Phvul.008G249300, Phvul.002G155700, Phvul.009G178300, Phvul.010G080000, Phvul.001G157600, CUFF.603
GO:0032991	macromolecular complex	C	51.3002	8.97752	6	672	734	18834	UNDER	Phvul.006G122100, Phvul.006G043900, Phvul.002G148300, Phvul.004G028400, Phvul.004G138300, Phvul.006G080600	Phvul.001G130000, Phvul.001G079900, Phvul.003G094500, Phvul.004G065100, Phvul.007G092200, Phvul.008G229700, Phvul.008G036900, Phvul.010G130700, Phvul.002G256400, Phvul.004G168100, Phvul.011G079400, Phvul.002G050400, CUFF.4662.1, Phvul.005G054600, Phvul.011G206600, Phvul.009G134600, Phvul.006G143600, Phvul.011G011500, Phvul.006G145900, Phvul.011G126600, Phvul.003G159100, Phvul.002G155700, Phvul.00…
GO:0030529	intracellular ribonucleoprotein complex	C	51.3002	8.97752	6	672	734	18834	UNDER	Phvul.006G122100, Phvul.006G043900, Phvul.002G148300, Phvul.004G028400, Phvul.004G138300, Phvul.006G080600	Phvul.001G130000, Phvul.001G079900, Phvul.003G094500, Phvul.004G065100, Phvul.007G092200, Phvul.008G229700, Phvul.008G036900, Phvul.010G130700, Phvul.002G256400, Phvul.004G168100, Phvul.011G079400, Phvul.002G050400, CUFF.4662.1, Phvul.005G054600, Phvul.011G206600, Phvul.009G134600, Phvul.006G143600, Phvul.011G011500, Phvul.006G145900, Phvul.011G126600, Phvul.003G159100, Phvul.002G155700, Phvul.00…
GO:0005840	ribosome	C	51.3002	8.97752	6	672	734	18834	UNDER	Phvul.006G122100, Phvul.006G043900, Phvul.002G148300, Phvul.004G028400, Phvul.004G138300, Phvul.006G080600	Phvul.001G130000, Phvul.001G079900, Phvul.003G094500, Phvul.004G065100, Phvul.007G092200, Phvul.008G229700, Phvul.008G036900, Phvul.010G130700, Phvul.002G256400, Phvul.004G168100, Phvul.011G079400, Phvul.002G050400, CUFF.4662.1, Phvul.005G054600, Phvul.011G206600, Phvul.009G134600, Phvul.006G143600, Phvul.011G011500, Phvul.006G145900, Phvul.011G126600, Phvul.003G159100, Phvul.002G155700, Phvul.00…
GO:1990904	ribonucleoprotein complex	C	51.3002	8.97752	6	672	734	18834	UNDER	Phvul.006G122100, Phvul.006G043900, Phvul.002G148300, Phvul.004G028400, Phvul.004G138300, Phvul.006G080600	Phvul.001G130000, Phvul.001G079900, Phvul.003G094500, Phvul.004G065100, Phvul.007G092200, Phvul.008G229700, Phvul.008G036900, Phvul.010G130700, Phvul.002G256400, Phvul.004G168100, Phvul.011G079400, Phvul.002G050400, CUFF.4662.1, Phvul.005G054600, Phvul.011G206600, Phvul.009G134600, Phvul.006G143600, Phvul.011G011500, Phvul.006G145900, Phvul.011G126600, Phvul.003G159100, Phvul.002G155700, Phvul.00…
GO:0031974	membrane-enclosed lumen	C	152.813	2.97985	1	365	739	19141	UNDER	Phvul.009G229700	CUFF.3196.1, Phvul.003G214600, Phvul.009G013500, CUFF.3922.1, CUFF.5063.1, Phvul.010G130700, Phvul.009G015000, Phvul.001G054600, Phvul.002G226300, Phvul.003G145500, Phvul.006G136500, Phvul.009G080900, Phvul.011G172500, Phvul.007G273700, Phvul.002G155700, Phvul.011G159400, Phvul.005G048600, Phvul.009G191400, Phvul.011G044300, Phvul.007G268100, CUFF.3957.1, Phvul.008G169200, Phvul.001G110400, Phvul…
GO:0043233	organelle lumen	C	152.813	2.97985	1	365	739	19141	UNDER	Phvul.009G229700	CUFF.3196.1, Phvul.003G214600, Phvul.009G013500, CUFF.3922.1, CUFF.5063.1, Phvul.010G130700, Phvul.009G015000, Phvul.001G054600, Phvul.002G226300, Phvul.003G145500, Phvul.006G136500, Phvul.009G080900, Phvul.011G172500, Phvul.007G273700, Phvul.002G155700, Phvul.011G159400, Phvul.005G048600, Phvul.009G191400, Phvul.011G044300, Phvul.007G268100, CUFF.3957.1, Phvul.008G169200, Phvul.001G110400, Phvul…
GO:0070013	intracellular organelle lumen	C	152.813	2.97985	1	365	739	19141	UNDER	Phvul.009G229700	CUFF.3196.1, Phvul.003G214600, Phvul.009G013500, CUFF.3922.1, CUFF.5063.1, Phvul.010G130700, Phvul.009G015000, Phvul.001G054600, Phvul.002G226300, Phvul.003G145500, Phvul.006G136500, Phvul.009G080900, Phvul.011G172500, Phvul.007G273700, Phvul.002G155700, Phvul.011G159400, Phvul.005G048600, Phvul.009G191400, Phvul.011G044300, Phvul.007G268100, CUFF.3957.1, Phvul.008G169200, Phvul.001G110400, Phvul…
GO:0031981	nuclear lumen	C	152.813	2.97985	1	365	739	19141	UNDER	Phvul.009G229700	CUFF.3196.1, Phvul.003G214600, Phvul.009G013500, CUFF.3922.1, CUFF.5063.1, Phvul.010G130700, Phvul.009G015000, Phvul.001G054600, Phvul.002G226300, Phvul.003G145500, Phvul.006G136500, Phvul.009G080900, Phvul.011G172500, Phvul.007G273700, Phvul.002G155700, Phvul.011G159400, Phvul.005G048600, Phvul.009G191400, Phvul.011G044300, Phvul.007G268100, CUFF.3957.1, Phvul.008G169200, Phvul.001G110400, Phvul…
GO:0009607	response to biotic stimulus	P	241.842	48.3684	22	211	718	19295	OVER	Phvul.006G151500, Phvul.006G102200, Phvul.003G109600, Phvul.011G182900, Phvul.008G225300, Phvul.003G109800, Phvul.003G109200, Phvul.011G183100, Phvul.003G109300, Phvul.002G187800, Phvul.009G253000, Phvul.005G071400, Phvul.003G109000, Phvul.002G187700, Phvul.007G187700, Phvul.003G254900, Phvul.009G006800, Phvul.002G209500, Phvul.008G222100, Phvul.009G158000, Phvul.009G252800, Phvul.009G244000	Phvul.003G056900, Phvul.003G109400, Phvul.006G162000, CUFF.3968.1, Phvul.011G122800, Phvul.002G209400, CUFF.5195.2, Phvul.010G086900, CUFF.844.1, Phvul.002G289200, Phvul.011G183500, Phvul.006G133800, Phvul.010G009800, Phvul.006G110900, CUFF.3726.1, Phvul.005G072700, Phvul.002G010400, Phvul.004G010400, CUFF.5643.1, Phvul.001G043600, Phvul.010G066500, CUFF.5169.2, Phvul.007G049700, Phvul.008G194500…
GO:0016043	cellular component organization	P	247.691	52.0152	31	1571	709	17935	UNDER	Phvul.001G098300, Phvul.009G013400, Phvul.007G147400, Phvul.008G040800, Phvul.009G233200, Phvul.007G168600, Phvul.008G273200, Phvul.007G162100, Phvul.006G164800, Phvul.001G021900, Phvul.009G000800, Phvul.008G249900, Phvul.008G008400, Phvul.001G210300, Phvul.007G176000, Phvul.006G080600, Phvul.007G082700, Phvul.002G324400, Phvul.001G106500, Phvul.001G076000, Phvul.008G095600, Phvul.003G187300, Phv…	Phvul.005G015000, Phvul.003G264300, Phvul.006G042900, Phvul.003G153800, CUFF.5835.1, CUFF.6526.1, Phvul.009G247400, Phvul.007G082400, Phvul.002G300200, Phvul.009G148900, Phvul.008G171400, Phvul.009G062100, Phvul.011G020200, Phvul.009G020700, Phvul.009G222100, Phvul.010G125000, Phvul.008G236000, Phvul.009G052300, Phvul.003G274100, Phvul.005G142000, CUFF.3064.1, Phvul.003G173400, Phvul.002G305900, …
GO:0071840	cellular component organization or biogenesis	P	247.691	52.0152	31	1571	709	17935	UNDER	Phvul.001G098300, Phvul.009G013400, Phvul.007G147400, Phvul.008G040800, Phvul.009G233200, Phvul.007G168600, Phvul.008G273200, Phvul.007G162100, Phvul.006G164800, Phvul.001G021900, Phvul.009G000800, Phvul.008G249900, Phvul.008G008400, Phvul.001G210300, Phvul.007G176000, Phvul.006G080600, Phvul.007G082700, Phvul.002G324400, Phvul.001G106500, Phvul.001G076000, Phvul.008G095600, Phvul.003G187300, Phv…	Phvul.005G015000, Phvul.003G264300, Phvul.006G042900, Phvul.003G153800, CUFF.5835.1, CUFF.6526.1, Phvul.009G247400, Phvul.007G082400, Phvul.002G300200, Phvul.009G148900, Phvul.008G171400, Phvul.009G062100, Phvul.011G020200, Phvul.009G020700, Phvul.009G222100, Phvul.010G125000, Phvul.008G236000, Phvul.009G052300, Phvul.003G274100, Phvul.005G142000, CUFF.3064.1, Phvul.003G173400, Phvul.002G305900, …
GO:0005829	cytosol	C	357.88	76.9441	15	962	725	18544	UNDER	Phvul.009G203300, Phvul.007G011400, Phvul.003G149200, Phvul.007G222900, Phvul.006G186600, Phvul.003G254900, Phvul.004G143600, Phvul.011G139100, Phvul.009G052800, Phvul.001G021900, Phvul.008G008400, Phvul.003G232700, Phvul.008G008100, Phvul.004G028400, Phvul.006G080600	Phvul.003G289600, Phvul.003G264300, Phvul.003G094500, CUFF.1825.1, CUFF.3730.1, Phvul.002G050400, Phvul.011G011500, Phvul.004G111200, CUFF.6624.1, Phvul.008G249300, Phvul.003G159100, Phvul.005G065500, Phvul.004G046700, CUFF.4565.2, Phvul.011G047700, Phvul.005G074200, Phvul.001G200300, Phvul.007G148100, Phvul.003G274100, CUFF.992.2, Phvul.008G181200, CUFF.5450.2, Phvul.005G031500, Phvul.001G223200…
GO:0044260	cellular macromolecule metabolic process	P	361.412	79.5106	84	3258	656	16248	UNDER	Phvul.006G122100, Phvul.007G017700, Phvul.003G199200, Phvul.005G094300, Phvul.005G101400, Phvul.010G092500, Phvul.008G275000, Phvul.008G002200, Phvul.001G040800, Phvul.004G147800, Phvul.009G103100, Phvul.009G239700, Phvul.009G239500, Phvul.008G222100, Phvul.001G029000, Phvul.009G239900, Phvul.001G040000, Phvul.008G046900, Phvul.010G065400, Phvul.004G136100, Phvul.002G215400, Phvul.005G181900, Phv…	Phvul.008G174900, Phvul.007G176800, Phvul.008G229700, Phvul.003G153800, Phvul.002G256400, Phvul.009G032700, Phvul.009G038000, CUFF.1366.1, Phvul.010G034100, Phvul.003G038800, Phvul.001G063200, Phvul.011G126600, CUFF.6877.1, Phvul.009G006400, Phvul.007G082
GO:0001071	nucleic acid binding transcription factor activity	F	365.97	84.1731	43	586	697	18920	OVER	Phvul.003G153100, Phvul.003G069000, Phvul.001G111800, Phvul.007G174800, Phvul.003G111800, Phvul.006G101700, Phvul.007G241800, Phvul.010G092300, Phvul.004G031900, Phvul.008G094400, Phvul.003G208600, Phvul.009G078300, Phvul.005G111800, Phvul.007G273000, Phvul.005G080300, Phvul.001G088200, Phvul.005G032900, Phvul.001G037000, Phvul.011G176900, Phvul.006G117200, Phvul.002G008600, Phvul.005G046200, Phv…	CUFF.2602.1, Phvul.002G094100, Phvul.010G000200, Phvul.008G090300, Phvul.002G165500, Phvul.009G130000, Phvul.006G186200, Phvul.009G075300, Phvul.003G252200, CUFF.4949.1, Phvul.008G283100, Phvul.002G243200, Phvul.001G157600, CUFF.6032.1, Phvul.002G027500, CUFF.2636.1, Phvul.003G288500, CUFF.3206.1, Phvul.011G116800, Phvul.010G154900, CUFF.181.1, Phvul.009G110400, Phvul.007G240200, CUFF.3960.1, Phv…
GO:0003700	transcription factor activity, sequence-specific DNA binding	F	365.97	84.1731	43	586	697	18920	OVER	Phvul.003G153100, Phvul.003G069000, Phvul.001G111800, Phvul.007G174800, Phvul.003G111800, Phvul.006G101700, Phvul.007G241800, Phvul.010G092300, Phvul.004G031900, Phvul.008G094400, Phvul.003G208600, Phvul.009G078300, Phvul.005G111800, Phvul.007G273000, Phvul.005G080300, Phvul.001G088200, Phvul.005G032900, Phvul.001G037000, Phvul.011G176900, Phvul.006G117200, Phvul.002G008600, Phvul.005G046200, Phv…	CUFF.2602.1, Phvul.002G094100, Phvul.010G000200, Phvul.008G090300, Phvul.002G165500, Phvul.009G130000, Phvul.006G186200, Phvul.009G075300, Phvul.003G252200, CUFF.4949.1, Phvul.008G283100, Phvul.002G243200, Phvul.001G157600, CUFF.6032.1, Phvul.002G027500, CUFF.2636.1, Phvul.003G288500, CUFF.3206.1, Phvul.011G116800, Phvul.010G154900, CUFF.181.1, Phvul.009G110400, Phvul.007G240200, CUFF.3960.1, Phv…
GO:0006950	response to stress	P	411.34	96.6649	73	1188	667	18318	OVER	Phvul.001G241300, Phvul.009G088500, Phvul.003G109600, Phvul.009G256400, Phvul.011G182900, Phvul.009G116500, Phvul.003G109800, Phvul.004G107700, Phvul.010G025700, Phvul.009G116700, Phvul.003G109200, Phvul.009G078300, Phvul.009G132900, Phvul.007G222900, Phvul.003G109000, Phvul.007G187700, Phvul.009G006800, Phvul.001G195000, Phvul.008G249900, Phvul.008G285400, Phvul.008G249500, Phvul.009G252800, Phv…	Phvul.001G132300, Phvul.003G107900, CUFF.5835.1, Phvul.002G220200, Phvul.011G151800, Phvul.007G101000, CUFF.1366.1, Phvul.004G036900, CUFF.698.1, Phvul.009G237600, CUFF.6877.1, Phvul.009G006400, Phvul.002G209400, Phvul.003G195200, Phvul.011G193200, Phvul.007G210800, Phvul.001G099400, Phvul.006G207100, Phvul.002G049400, Phvul.005G045900, Phvul.006G133800, CUFF.2821.2, Phvul.006G110900, Phvul.004G0…
GO:0005622	intracellular	C	416.003	99.8407	251	8005	489	11501	UNDER	Phvul.009G088500, Phvul.006G122100, Phvul.009G116500, Phvul.003G208600, Phvul.007G222900, Phvul.004G143600, Phvul.008G285400, Phvul.011G134100, Phvul.007G176000, Phvul.009G065500, Phvul.010G065400, Phvul.005G093300, Phvul.002G324400, Phvul.008G104900, Phvul.011G127000, Phvul.007G020700, Phvul.008G163100, Phvul.006G205600, Phvul.009G167400, Phvul.001G160100, Phvul.001G251000, Phvul.003G062900, Phv…	Phvul.011G000600, Phvul.003G107900, Phvul.011G025900, Phvul.008G229700, Phvul.006G107500, Phvul.002G256400, Phvul.009G032700, Phvul.003G222900, Phvul.005G054600, Phvul.010G034100, Phvul.009G107100, CUFF.5278.1, Phvul.001G063200, Phvul.003G058400, Phvul.00
GO:0009056	catabolic process	P	104.065	254.959	77	1307	663	18199	OVER	Phvul.002G069300, Phvul.008G040800, Phvul.011G132000, Phvul.009G116500, Phvul.003G262600, Phvul.009G116700, Phvul.001G163200, Phvul.009G132900, Phvul.007G011400, Phvul.011G132800, Phvul.007G222900, Phvul.010G092500, Phvul.011G130900, Phvul.008G053400, Phvul.004G143600, Phvul.002G193300, Phvul.008G241100, Phvul.006G048000, Phvul.008G249900, Phvul.006G004900, Phvul.008G249500, Phvul.011G134100, Phv…	Phvul.002G071100, Phvul.003G289600, CUFF.3173.1, Phvul.005G015000, Phvul.003G264300, Phvul.003G103300, Phvul.007G015800, Phvul.011G161600, Phvul.006G208200, Phvul.001G199000, Phvul.003G184300, Phvul.002G224800, CUFF.3523.1, Phvul.009G168500, Phvul.010G058300, Phvul.004G077200, Phvul.001G222100, Phvul.004G111200, Phvul.007G082400, Phvul.006G122900, Phvul.002G191800, Phvul.005G029400, CUFF.1004.1, …
GO:0044424	intracellular part	C	1269.86	328.558	221	7076	519	12430	UNDER	Phvul.009G088500, Phvul.006G122100, Phvul.009G116500, Phvul.003G208600, Phvul.007G222900, Phvul.004G143600, Phvul.008G285400, Phvul.011G134100, Phvul.007G176000, Phvul.010G065400, Phvul.002G324400, Phvul.008G104900, Phvul.011G127000, Phvul.008G163100, Phvul.009G167400, Phvul.001G160100, Phvul.001G251000, Phvul.003G062900, Phvul.011G139100, Phvul.003G223200, Phvul.007G192500, Phvul.003G232700, Phv…	Phvul.011G000600, Phvul.003G107900, Phvul.011G025900, Phvul.008G229700, Phvul.002G256400, Phvul.009G032700, Phvul.003G222900, Phvul.005G054600, Phvul.010G034100, CUFF.5278.1, Phvul.001G063200, Phvul.003G058400, Phvul.008G079500, Phvul.011G126600, Phvul.00
GO:0006259	DNA metabolic process	P	1269.86	330.163	7	585	733	18921	UNDER	Phvul.007G028400, Phvul.007G228100, Phvul.005G101400, Phvul.007G168600, Phvul.007G186100, Phvul.007G232800, Phvul.009G118000	Phvul.001G096000, Phvul.007G176800, CUFF.5835.1, Phvul.010G161200, Phvul.004G122100, Phvul.007G101000, Phvul.011G019100, Phvul.010G034100, Phvul.003G195200, Phvul.001G178300, Phvul.010G080000, Phvul.009G040200, Phvul.001G099400, CUFF.5388.1, Phvul.005G045900, CUFF.6745.1, Phvul.005G148900, Phvul.008G242800, Phvul.009G052300, Phvul.004G070700, Phvul.005G016200, Phvul.001G121400, Phvul.009G076500, …
GO:0090304	nucleic acid metabolic process	P	1269.86	330.163	7	585	733	18921	UNDER	Phvul.007G028400, Phvul.007G228100, Phvul.005G101400, Phvul.007G168600, Phvul.007G186100, Phvul.007G232800, Phvul.009G118000	Phvul.001G096000, Phvul.007G176800, CUFF.5835.1, Phvul.010G161200, Phvul.004G122100, Phvul.007G101000, Phvul.011G019100, Phvul.010G034100, Phvul.003G195200, Phvul.001G178300, Phvul.010G080000, Phvul.009G040200, Phvul.001G099400, CUFF.5388.1, Phvul.005G045900, CUFF.6745.1, Phvul.005G148900, Phvul.008G242800, Phvul.009G052300, Phvul.004G070700, Phvul.005G016200, Phvul.001G121400, Phvul.009G076500, …
GO:0005215	transporter activity	F	1497.43	396.82	72	1222	668	18284	OVER	Phvul.006G151500, Phvul.006G101400, Phvul.007G147400, Phvul.010G159400, Phvul.007G120200, Phvul.004G111600, Phvul.008G225300, Phvul.010G126200, Phvul.001G010100, Phvul.001G163400, Phvul.002G331700, Phvul.009G243600, Phvul.003G141300, Phvul.003G124800, Phvul.003G143800, Phvul.005G145900, Phvul.002G210400, Phvul.003G151700, Phvul.002G243000, Phvul.006G065900, Phvul.003G023300, Phvul.006G170100, Phv…	Phvul.008G149700, Phvul.010G073700, Phvul.011G046600, Phvul.003G069300, Phvul.001G237600, Phvul.001G073000, Phvul.002G277100, Phvul.006G164300, Phvul.008G094900, Phvul.003G279800, Phvul.007G220600, Phvul.008G079500, Phvul.003G228200, Phvul.005G155300, Phvul.002G176400, Phvul.001G108200, Phvul.001G131200, Phvul.001G076500, CUFF.6372.1, Phvul.002G095300, Phvul.003G183200, Phvul.001G030500, Phvul.00…
GO:0005198	structural molecule activity	F	15.655	422.685	6	532	734	18974	UNDER	Phvul.006G122100, Phvul.002G229200, Phvul.002G329800, Phvul.002G148300, Phvul.004G028400, Phvul.006G080600	Phvul.001G079900, Phvul.003G094500, Phvul.004G065100, Phvul.007G092200, Phvul.008G229700, Phvul.008G036900, Phvul.002G256400, Phvul.011G079400, Phvul.002G050400, CUFF.4662.1, Phvul.011G206600, Phvul.009G017300, Phvul.009G134600, Phvul.003G231500, Phvul.007G141700, Phvul.006G145900, Phvul.011G126600, Phvul.003G159100, Phvul.002G266200, Phvul.004G046700, Phvul.006G063600, CUFF.2867.1, Phvul.007G278…
GO:0043229	intracellular organelle	C	2094.09	586.347	180	5885	560	13621	UNDER	Phvul.006G151500, Phvul.009G229700, Phvul.006G122100, Phvul.007G090300, Phvul.002G264300, Phvul.010G159400, Phvul.009G256400, Phvul.002G092200, Phvul.009G116500, Phvul.003G208600, Phvul.009G078300, Phvul.009G090300, Phvul.011G054500, Phvul.007G222900, Phvul.003G254900, Phvul.004G143600, Phvul.002G120200, Phvul.005G186200, Phvul.008G271400, Phvul.008G285400, Phvul.008G222100, Phvul.011G134100, Phv…	Phvul.011G000600, Phvul.003G107900, Phvul.011G025900, Phvul.008G229700, Phvul.005G086200, Phvul.011G071800, CUFF.1825.1, Phvul.001G258300, Phvul.002G256400, Phvul.009G032700, Phvul.006G052700, Phvul.005G109400, Phvul.003G222900, Phvul.005G054600, Phvul.00
GO:0043226	organelle	C	2094.09	586.347	180	5885	560	13621	UNDER	Phvul.006G151500, Phvul.009G229700, Phvul.006G122100, Phvul.007G090300, Phvul.002G264300, Phvul.010G159400, Phvul.009G256400, Phvul.002G092200, Phvul.009G116500, Phvul.003G208600, Phvul.009G078300, Phvul.009G090300, Phvul.011G054500, Phvul.007G222900, Phvul.003G254900, Phvul.004G143600, Phvul.002G120200, Phvul.005G186200, Phvul.008G271400, Phvul.008G285400, Phvul.008G222100, Phvul.011G134100, Phv…	Phvul.011G000600, Phvul.003G107900, Phvul.011G025900, Phvul.008G229700, Phvul.005G086200, Phvul.011G071800, CUFF.1825.1, Phvul.001G258300, Phvul.002G256400, Phvul.009G032700, Phvul.006G052700, Phvul.005G109400, Phvul.003G222900, Phvul.005G054600, Phvul.00
GO:0005730	nucleolus	C	2292.97	653.496	0	209	740	19297	UNDER		Phvul.003G214600, CUFF.3922.1, CUFF.5063.1, Phvul.009G015000, Phvul.003G145500, Phvul.006G136500, Phvul.009G080900, Phvul.011G172500, Phvul.007G273700, Phvul.011G159400, Phvul.005G048600, Phvul.009G191400, Phvul.011G044300, Phvul.007G268100, Phvul.008G169200, Phvul.001G110400, Phvul.010G131000, Phvul.011G076800, Phvul.005G020700, CUFF.807.2, Phvul.010G009800, CUFF.6831.1, Phvul.001G125200, Phvul.…
GO:0003676	nucleic acid binding	F	2836.86	822.691	81	2998	659	16508	UNDER	Phvul.009G229700, Phvul.001G111800, Phvul.003G111800, Phvul.002G264300, Phvul.005G101400, Phvul.010G092300, Phvul.003G208600, Phvul.009G078300, Phvul.008G103100, Phvul.005G111800, Phvul.002G275000, Phvul.005G080300, Phvul.005G032900, Phvul.011G176900, Phvul.L007800, Phvul.001G214600, Phvul.007G176000, Phvul.007G193300, Phvul.009G065500, Phvul.002G155300, Phvul.007G211900, Phvul.001G160500, Phvul.…	Phvul.007G176800, Phvul.005G086200, CUFF.5835.1, Phvul.004G122100, CUFF.2275.1, Phvul.008G090300, Phvul.003G222900, Phvul.002G165500, Phvul.005G054600, Phvul.010G034100, Phvul.004G011600, Phvul.003G254500, Phvul.006G143600, CUFF.4467.1, Phvul.008G249300,
GO:0050896	response to stimulus	P	31.801	938.129	110	2107	630	17399	OVER	Phvul.001G241300, Phvul.006G151500, Phvul.007G147400, Phvul.009G088500, Phvul.007G017700, Phvul.009G256400, Phvul.009G116500, Phvul.003G109800, Phvul.009G078300, Phvul.011G054500, Phvul.007G222900, Phvul.003G109000, Phvul.007G187700, Phvul.003G254900, Phvul.002G193300, Phvul.009G006800, Phvul.008G285400, Phvul.008G222100, Phvul.010G065400, Phvul.002G288400, Phvul.006G102200, Phvul.001G215300, Phv…	Phvul.001G132300, Phvul.003G107900, CUFF.5835.1, Phvul.006G107500, Phvul.001G201400, CUFF.1366.1, CUFF.4116.1, Phvul.004G092600, Phvul.006G038400, Phvul.003G222900, Phvul.002G165500, Phvul.003G279800, Phvul.001G063200, Phvul.004G036900, Phvul.009G237600,
GO:0030312	external encapsulating structure	C	3307.3	1008.73	26	336	714	19170	OVER	Phvul.001G098300, Phvul.011G075900, Phvul.003G264400, Phvul.003G214100, Phvul.009G233200, Phvul.001G128500, Phvul.006G126200, Phvul.007G187700, Phvul.005G122900, Phvul.008G285400, Phvul.007G119500, Phvul.007G082700, Phvul.011G074900, Phvul.003G154800, Phvul.001G106500, Phvul.001G076000, Phvul.008G010600, Phvul.007G140000, Phvul.003G003200, Phvul.004G150600, Phvul.002G152400, Phvul.010G139300, Phv…	Phvul.006G088100, Phvul.005G015000, Phvul.007G088500, Phvul.002G237200, Phvul.006G208200, Phvul.001G140600, Phvul.011G004400, Phvul.009G227800, Phvul.005G059500, Phvul.003G258300, CUFF.6115.1, Phvul.002G201800, Phvul.006G077200, Phvul.003G080100, Phvul.008G151100, Phvul.009G191400, Phvul.005G174500, Phvul.006G170300, Phvul.002G170300, Phvul.009G021000, Phvul.009G148900, Phvul.008G150800, Phvul.00…
GO:0005618	cell wall	C	3307.3	1008.73	26	336	714	19170	OVER	Phvul.001G098300, Phvul.011G075900, Phvul.003G264400, Phvul.003G214100, Phvul.009G233200, Phvul.001G128500, Phvul.006G126200, Phvul.007G187700, Phvul.005G122900, Phvul.008G285400, Phvul.007G119500, Phvul.007G082700, Phvul.011G074900, Phvul.003G154800, Phvul.001G106500, Phvul.001G076000, Phvul.008G010600, Phvul.007G140000, Phvul.003G003200, Phvul.004G150600, Phvul.002G152400, Phvul.010G139300, Phv…	Phvul.006G088100, Phvul.005G015000, Phvul.007G088500, Phvul.002G237200, Phvul.006G208200, Phvul.001G140600, Phvul.011G004400, Phvul.009G227800, Phvul.005G059500, Phvul.003G258300, CUFF.6115.1, Phvul.002G201800, Phvul.006G077200, Phvul.003G080100, Phvul.008G151100, Phvul.009G191400, Phvul.005G174500, Phvul.006G170300, Phvul.002G170300, Phvul.009G021000, Phvul.009G148900, Phvul.008G150800, Phvul.00…
GO:0003824	catalytic activity	F	3536.38	1096.28	398	9288	342	10218	OVER	Phvul.001G098300, Phvul.009G124800, Phvul.010G126200, Phvul.007G222900, Phvul.007G071500, Phvul.002G210400, Phvul.011G134100, Phvul.009G239900, Phvul.009G067800, Phvul.007G194000, Phvul.007G198600, Phvul.002G324400, Phvul.008G226200, Phvul.007G255600, Phvul.001G259400, Phvul.003G062900, Phvul.011G035600, Phvul.003G232700, Phvul.009G244000, Phvul.007G114200, Phvul.006G155800, Phvul.005G111700, Phv…	Phvul.007G151500, Phvul.005G015000, Phvul.011G025900, Phvul.006G208200, Phvul.007G050800, Phvul.006G107500, Phvul.009G032700, CUFF.1366.1, CUFF.3523.1, Phvul.007G036500, Phvul.005G054600, Phvul.003G033100, Phvul.010G034100, Phvul.004G011600, Phvul.003G058
GO:0071944	cell periphery	C	3933.6	1239.08	88	1634	652	17872	OVER	Phvul.001G098300, Phvul.006G101400, Phvul.007G147400, Phvul.009G145300, Phvul.010G159400, Phvul.007G120200, Phvul.008G225300, Phvul.009G233200, Phvul.007G222900, Phvul.001G010100, Phvul.007G187700, Phvul.003G254900, Phvul.009G243600, Phvul.009G006800, Phvul.005G122900, Phvul.001G195000, Phvul.002G210400, Phvul.008G285400, Phvul.008G222100, Phvul.003G151700, Phvul.008G046900, Phvul.003G023300, Phv…	Phvul.005G015000, Phvul.010G073700, Phvul.006G208200, Phvul.010G128500, Phvul.009G227800, CUFF.1366.1, CUFF.4116.1, CUFF.6526.1, Phvul.003G279800, CUFF.6877.1, Phvul.009G148900, Phvul.001G076500, Phvul.010G162400, Phvul.009G222100, CUFF.6187.1, Phvul.003G140500, CUFF.5221.1, Phvul.005G110400, Phvul.011G089100, Phvul.011G083800, Phvul.008G047900, Phvul.001G043600, Phvul.011G194300, Phvul.008G19450…
GO:0019748	secondary metabolic process	P	622.939	1993.4	23	292	717	19214	OVER	Phvul.001G138900, Phvul.008G018700, Phvul.003G074000, Phvul.002G241400, Phvul.002G263700, Phvul.005G053900, Phvul.002G187800, Phvul.003G051600, Phvul.007G013200, Phvul.002G187700, Phvul.010G117100, Phvul.008G241100, Phvul.005G053200, Phvul.006G054100, Phvul.008G032800, Phvul.008G248600, Phvul.001G139500, Phvul.009G244000, Phvul.006G138100, Phvul.002G025100, Phvul.002G047500, Phvul.007G003100, Phv…	CUFF.359.1, Phvul.004G021400, Phvul.003G153000, Phvul.001G216100, Phvul.007G086200, Phvul.011G092500, CUFF.1343.1, Phvul.003G147000, Phvul.006G054200, Phvul.001G145500, Phvul.010G115300, Phvul.010G063900, Phvul.002G268500, Phvul.002G025200, Phvul.004G159500, Phvul.003G213400, Phvul.006G018800, Phvul.004G087000, Phvul.002G294800, Phvul.011G020200, Phvul.005G039100, Phvul.007G102100, Phvul.001G1855…
GO:0044444	cytoplasmic part	C	824.925	2681.01	116	3923	624	15583	UNDER	Phvul.006G151500, Phvul.006G122100, Phvul.007G090300, Phvul.010G159400, Phvul.009G256400, Phvul.002G092200, Phvul.009G116500, Phvul.009G090300, Phvul.011G054500, Phvul.007G222900, Phvul.006G186600, Phvul.003G254900, Phvul.004G143600, Phvul.008G271400, Phvul.008G285400, Phvul.011G134100, Phvul.001G029000, Phvul.011G127000, Phvul.011G074900, Phvul.008G163100, Phvul.004G014600, Phvul.009G167400, Phv…	Phvul.011G000600, Phvul.011G025900, Phvul.008G229700, Phvul.011G071800, CUFF.1825.1, Phvul.001G258300, Phvul.002G256400, Phvul.009G032700, Phvul.005G109400, Phvul.005G054600, Phvul.004G031200, Phvul.006G013100, CUFF.238.2, Phvul.010G034100, Phvul.002G0350
